# Supplementary material
Source: PubMed Central journal article supplement (PMC3547249)
Supplement: mmc1.pdf [file mmc1.pdf]

# THE LANCET

## **Supplementary appendix**

This appendix formed part of the original submission and has been peer reviewed. We post it as supplied by the authors.

Supplement to: Piel FB, Patil AP, Howes RE, et al. Global epidemiology of sickle haemoglobin in neonates: a contemporary geostatistical model-based map and population estimates. *Lancet* 2012; published online Oct 25. [http://dx.doi.org/10.1016/S0140-6736\(12\)61229-X](http://dx.doi.org/10.1016/S0140-6736(12)61229-X).

## **Web Appendix outline**

### **Web Appendix 1.** HbS database and allele frequency map

1. Database of HbS allele frequency survey data
  - Data sources
  - Inclusion criteria
  - Georeferencing
2. Creating a map of HbS allele frequency
  - Model
  - Prior for  $S$
  - Likelihood
  - Flexible link function and empirical Bayesian analysis
  - Empirical Bayesian approach to fitting the polynomial coefficients
  - Prior predictive constraint
  - Fitting the model
  - Mapping procedure
  - Validation and model performance metrics
3. Historical vs. contemporary maps

### **Web Appendix 2.** Newborn estimates

1. Demographic data
2. Areal predictions
3. Model validation and performance metrics
4. The use of modified WHO regions
5. Comparison of national estimates with Modell and Darlison's (M&D)
6. National newborn screening programme data

## **Web Tables**

**Web Table 1.** National demographic indicators and estimates of HbS allele frequency and neonates affected

**Web Table 2.** National areal prediction summaries and Monte Carlo standard errors (SE) for AS and SS newborn estimates

**Web Table 3.** Sub-national areal prediction summaries and Monte Carlo standard errors (SE) for AS and SS newborn estimates

**Web Table 4. Global, regional and national rates of neonates affected (HbAS and HbSS)** based on median estimates presented in this report (termed MAP) and on data calculated by Modell and Darlison (termed M&D). Births for 2003 and 2010 are shown in thousands and are based on the 2003 UN Demographic Yearbook and the 2010 UN World Population Prospects, respectively.

**Web Table 5.** MCMC output parameter values

**Web Table 6.** Summary of data selection and modelling assumptions

## **Web Figures**

**Web Figure 1.** Temporal distribution of the surveys included in the model

**Web Figure 2.** Sample size of the HbS surveys

**Web Figure 3.** Temporal distribution and sample size of the HbS surveys per country within each WHO region. A. AFRO region, B. AMRO region, C. EMRO region, D. EURO region, E. SEARO region and F. WPRO region.

**Web Figure 4.** Distribution of the validation subsets

**Web Figure 5.** Validation plots

**Web Figure 6.** Global human population in 2010

**Web Figure 7.** Crude birth rate per country

**Web Figure 8.** WHO and HbS regions

## **Web Dataset**

**Web Dataset.** List of published and unpublished data sources

## Web Appendix 1. HbS database and allele frequency map.

### 1. Database of HbS allele frequency survey data

#### Data sources

Systematic searches of the literature published since 1950 were undertaken following procedures developed by the Malaria Atlas Project (MAP, <http://www.map.ox.ac.uk>)<sup>1-3</sup> to create a contemporary database of available sickle haemoglobin (HbS) allele frequency surveys. Preliminary searches were conducted on 12 December 2007, using the following online bibliographic archives: PubMed (<http://www.pubmed.gov>), ISI Web of Knowledge (<http://isiwebofknowledge.com>) and Scopus (<http://www.scopus.com>). The keyword string used was: “sickle cell” or “haemoglobin S” or “hemoglobin S” or “Hb S”. Searches were last run on 20 October 2009. A total of 18,336 (in *Text terms*), 28,908 (in *Title/Keywords/Abstract*) and 22,732 (in *Article Title/Abstract/Keywords*) references were found in the three respective databases and exported using bibliographic management software (Endnote X4, Thomson-Reuters, Carlsbad, CA, USA). The 2,220 references from Livingstone's extensive, but out of date, database on frequencies of haemoglobin variants<sup>4</sup> were then merged. Manual duplicate removal and abstract reviews of the amalgamated search results identified 3,531 references likely to contain data allowing calculation of HbS allele frequency. Despite using a conservative approach, the vast majority (91.5%) of the 41,445 unique references identified were irrelevant as they consisted of animal studies, case reports, technical descriptions of new protocols and methods, or reviews and general articles not including any primary data. Full text searches were conducted for each of the relevant references identified. When possible, authors were contacted for additional information concerning their studies in order to obtain missing information necessary to assess the quality of their results. In addition, direct contact with researchers working in Cambodia, Indonesia, Mali, Sri Lanka and Venezuela allowed inclusion of various sets of unpublished data. Finally, data collected by the Malaria Genomic Epidemiology Network Consortium (MalariaGEN, <http://www.malariagen.net>), representing a valuable source of standardised data from several malaria endemic countries,<sup>5</sup> were also incorporated in the database.

Contributors are acknowledged on the MAP website (<http://www.map.ox.ac.uk/inherited-blood-disorders/acknowledgements/>). All sources from which data met the criteria for inclusion are listed in Web Dataset. Data are available on the MAP website (<http://www.map.ox.ac.uk>).

#### Inclusion criteria

Only population samples representative of the local communities were included. Studies where the sampling method was not explicitly stated to have been random or universal screening could be considered representative so long as other information in the article did not indicate that the sample was biased. Detailed data given for all ethnic groups found in an area (based on the information provided in the original source) were recorded as separate entries but spatial duplicates. Surveys targeting only specific ethnic groups (e.g. African Americans in North America) were excluded as in most cases the proportion of that particular ethnic group in the general population was unknown, as well as the allele frequency in the other ethnic groups present at the sampling site. Surveys focusing on hospital patients (e.g. minor ailments, fever or malaria) were also excluded, as they may represent biased estimates of the frequency in the general population. When several surveys were conducted in the same area, we kept only the most informative one (using a combination of year of survey, sample size and sampling and diagnostic methods criteria). The temporal distribution of surveys (not taken into account in our model due to the limited amount of data available) included in the model is shown in Web Figure 1.

**Web Figure 1** Temporal distribution of the surveys included in the model (n=1,211). Vertical grey bars indicate the number of data sources for each year, shown on the left-hand axis. The red dashed line corresponds to a cumulative proportion of the total number of data sources, quantified on the right-hand y-axis of the plot.

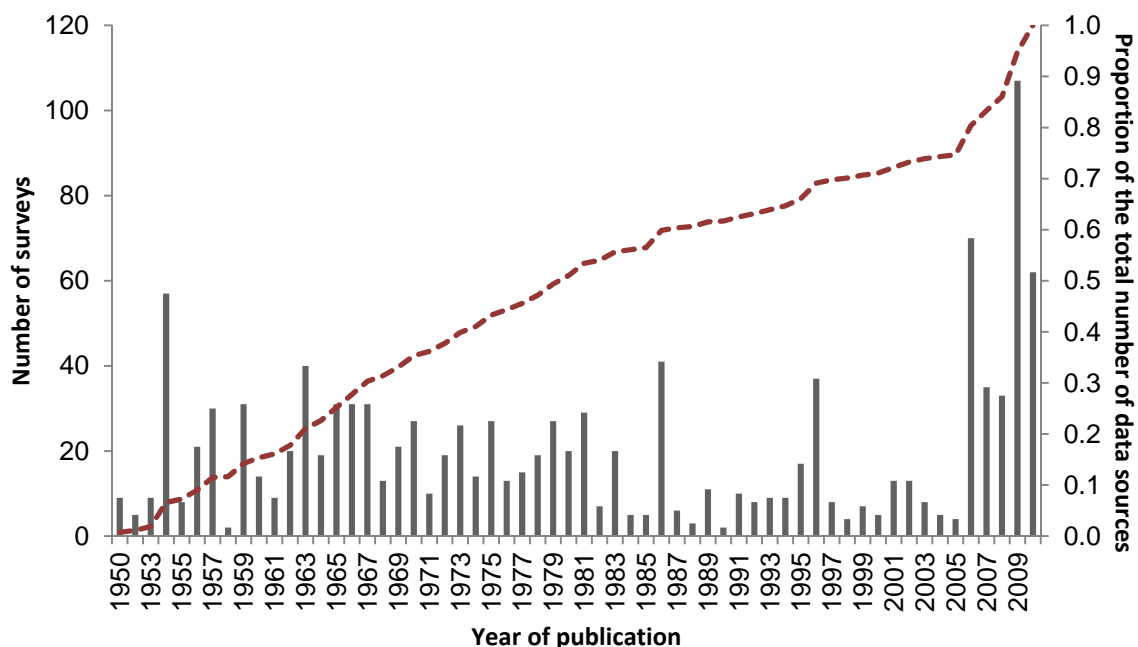

No constraints were placed on sample size (Web Figure 2), as there is no rationale for excluding small sample sizes in a model-based geostatistical (MBG) framework (see below). This is because, on one hand the model weighs the information content of each survey in accordance with a binomial sampling model, therefore

down-weighting the information from very small samples, and on the other hand the uncertainty in relation to the sample size is explicitly modelled by this technique.<sup>6</sup> Nevertheless, case reports were excluded from this study as they did not match our criterion for representativeness of the local communities. Web Figure 3 shows both the temporal distribution of surveys and their sample size for each country within each WHO region (see Web Figure 8).

The number of normal (HbA or *neg*) and abnormal (HbS or *pos*) alleles observed was used as input for the model. For example, in a sample of  $N$  individuals tested in which  $n_{AA}$ ,  $n_{AS}$ ,  $n_{SS}$  were found to be AA, AS and SS individuals respectively, HbA allele frequency is  $p = \frac{(2*n_{AA})+n_{AS}}{2N}$  and HbS allele frequency is  $q = \frac{(2*n_{SS})+n_{AS}}{2N}$ . Individuals identified as sicklers in earlier studies were all considered as carriers. We assumed all populations were at Hardy-Weinberg equilibrium (HWE).<sup>7,8</sup>

**Web Figure 2.** Sample size of the HbS surveys. The size of the circles is proportional to the number of individuals tested.

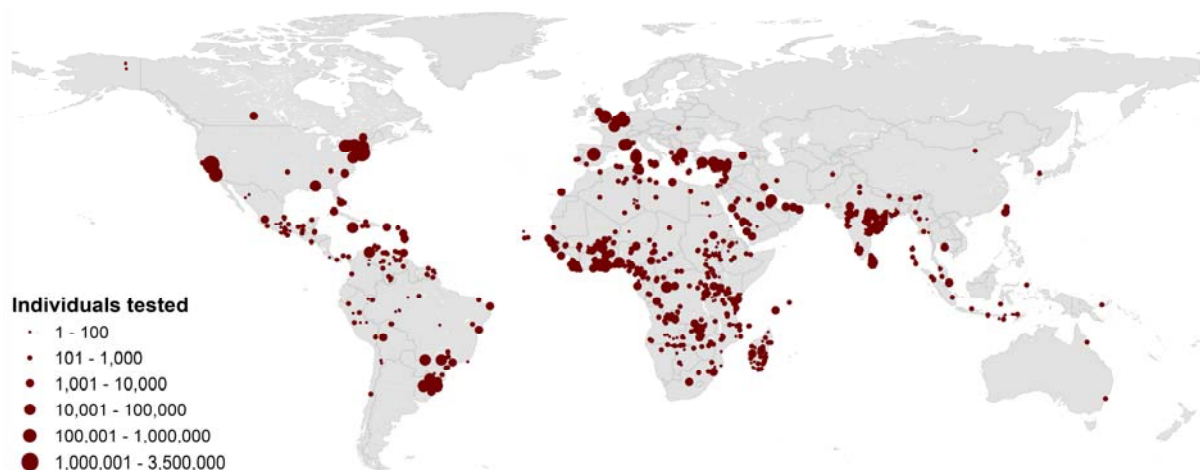

Although compound individuals for haemoglobin C (HbC) and  $\beta$ -thalassaemia<sup>9, 10</sup> are also of clinical and public health significance, we deliberately did not include these data in the present study. Limited data currently available on HbC<sup>11</sup>, the complexity of the multiple variants for  $\beta$ -thalassaemias and the small number of individuals affected relative to HbAS, make the inclusion of these conditions difficult in the present modelling framework.

### Georeferencing

The geographic location of each survey was determined as precisely as possible using a georeferencing protocol adapted from Guerra et al.<sup>3</sup> Authors' descriptions of survey sites were used to locate the sampling

sites. Geographic coordinates (in decimal degrees) were identified in various global gazetteers including the Encarta Reference Library 2007 (Microsoft Corporation, Redmond, WA, USA), Geonames (National Geospatial-Intelligence Agency. <http://geonames.nga.mil/ggmagaz/>) and Global Gazetteer Version 2.2 (Falling Rain Genomics Inc. <http://www.fallingrain.com/world/index.html>). Surveys were categorised according to the extent of the area that they represented: points ( $\leq 10\text{km}^2$ ), wide areas ( $>10$  and  $\leq 25\text{km}^2$ ), and small ( $>25$  and  $\leq 100\text{km}^2$ ) or large polygons ( $>100\text{km}^2$ ). Polygons were digitised and centroids calculated in Geographic Information Systems (GIS) software (ArcView 3.2 and ArcMap 10.0, ESRI Inc., Redlands, CA, USA). A similar method was applied to surveys which could only be georeferenced to the district (admin2 unit) level. Surveys reported only to province (admin1 unit) or country (admin0 unit) level were considered to lack sufficient geographical specificity and were thus excluded. The geographic coordinates (latitude and longitude) were used as input in the model.

**Web Figure 3.** Temporal distribution and sample size of the HbS surveys per country within each WHO region. A. AFRO region, B. AMRO region, C. EMRO region, D. EURO region, E. SEARO region and F. WPRO region.

**A. Temporal distribution and size of surveys per country (AFRO region)**

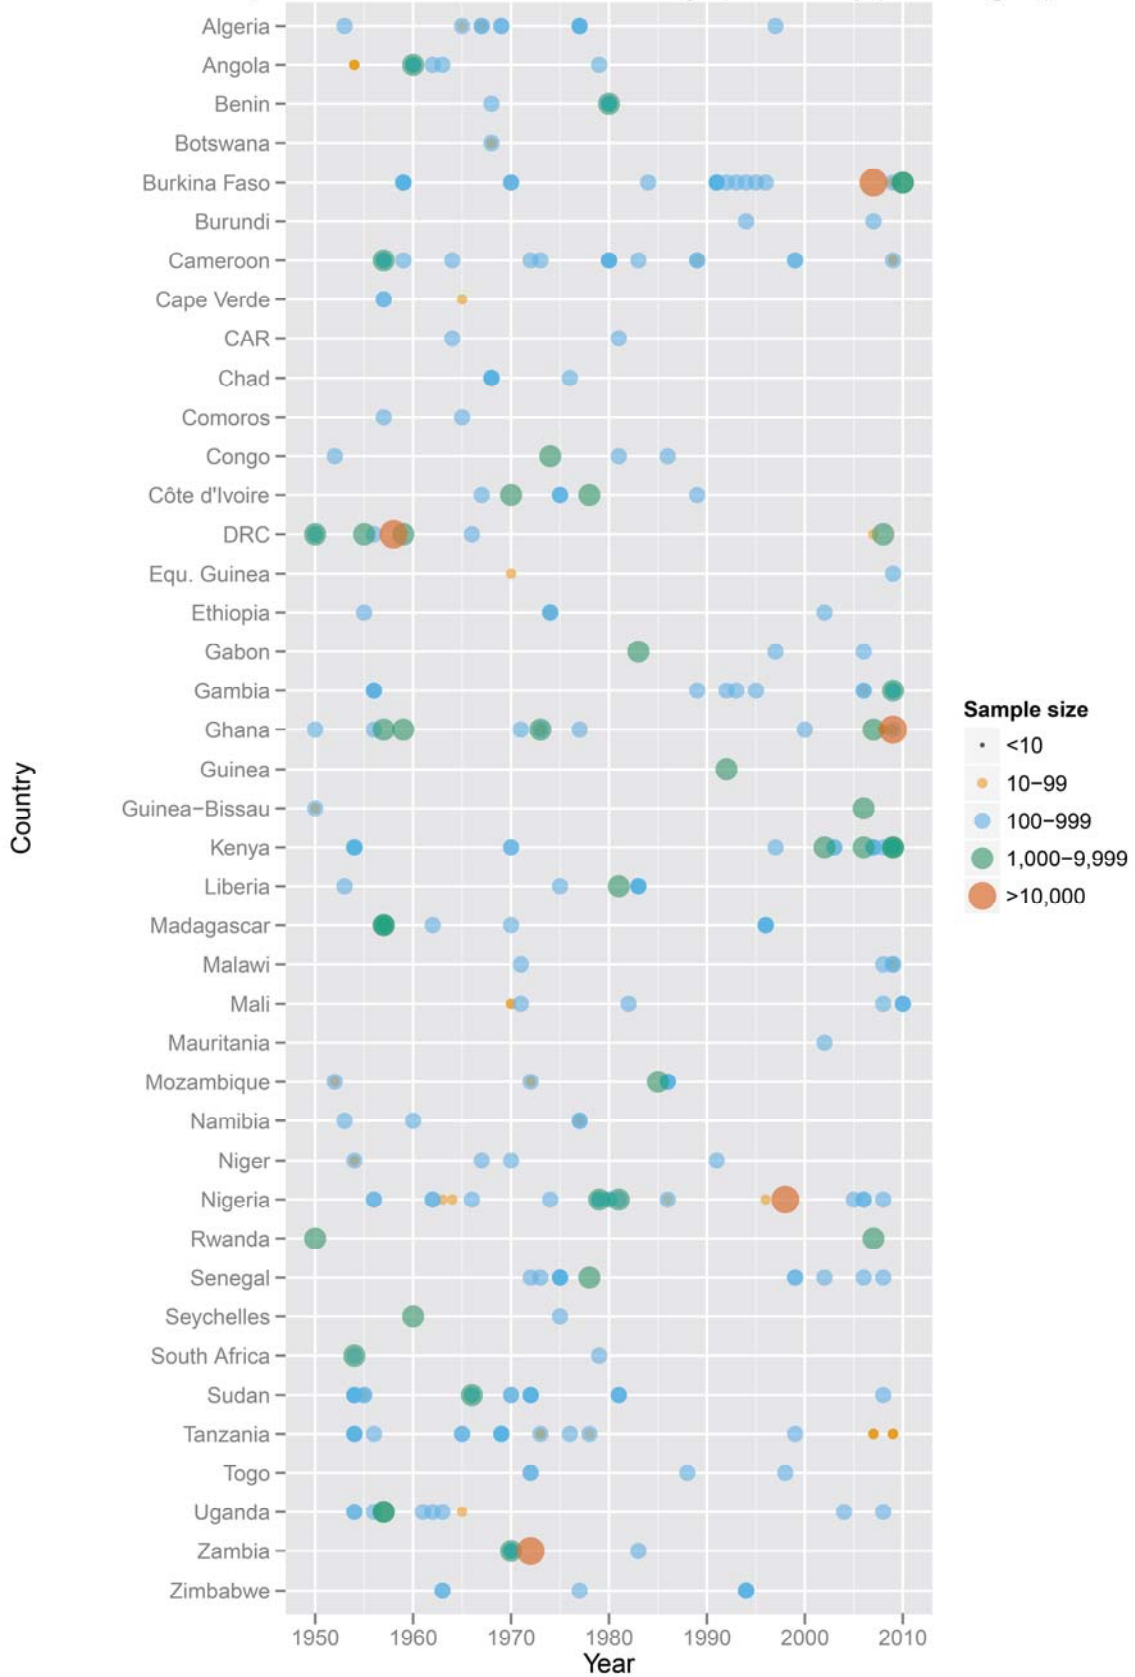



**B. Temporal distribution and size of surveys per country (AMRO region)**

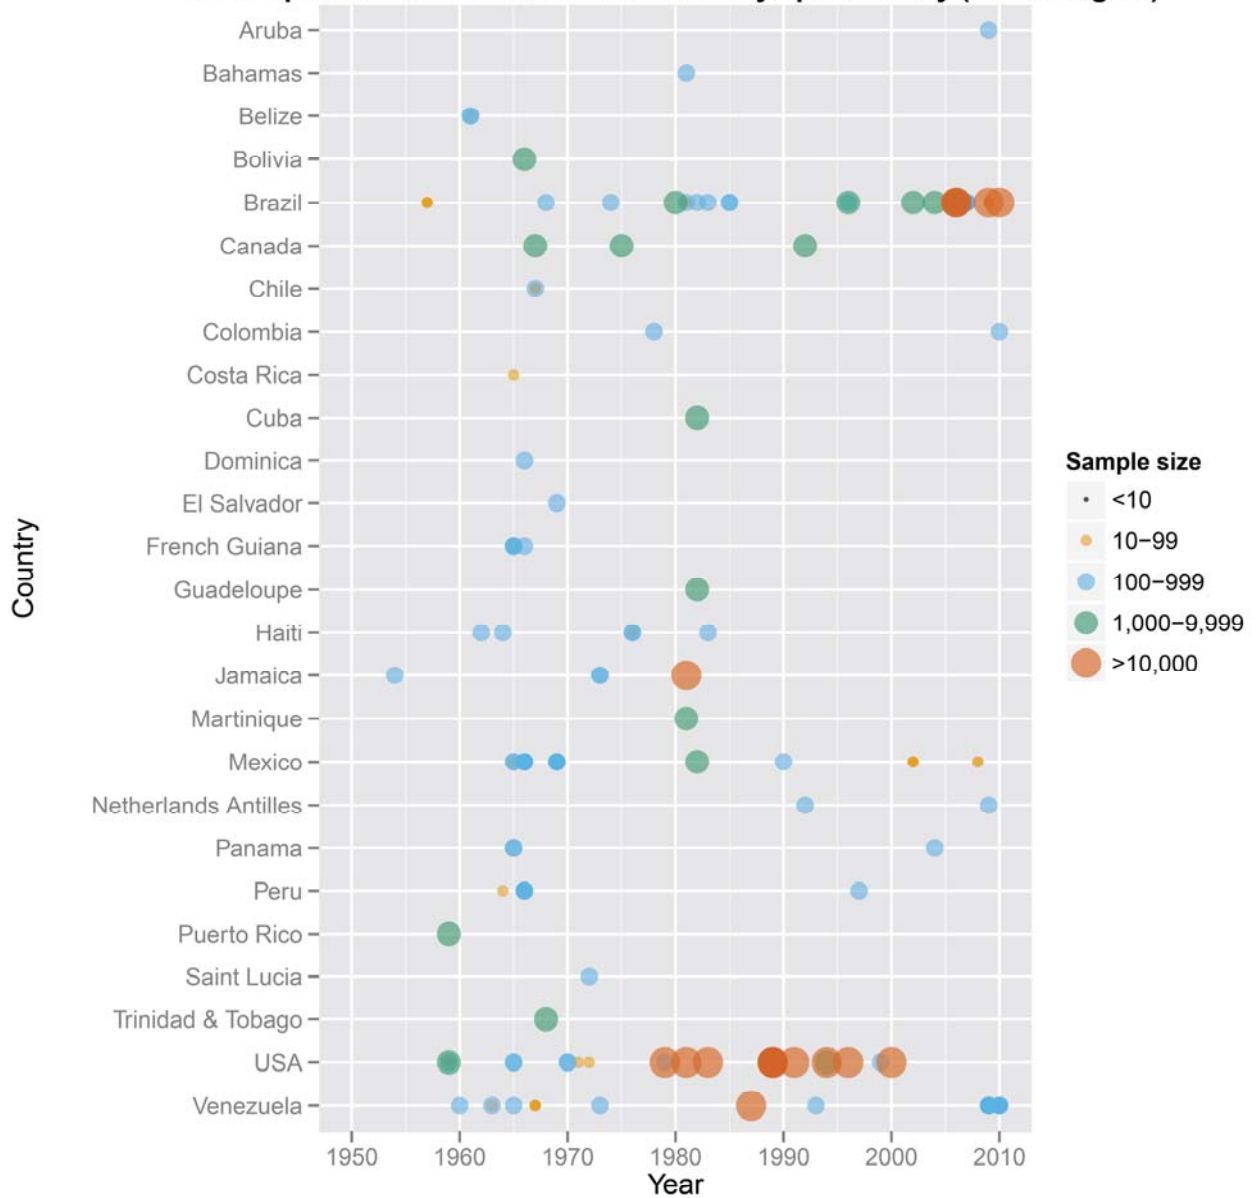

**C. Temporal distribution and size of surveys per country (EMRO region)**

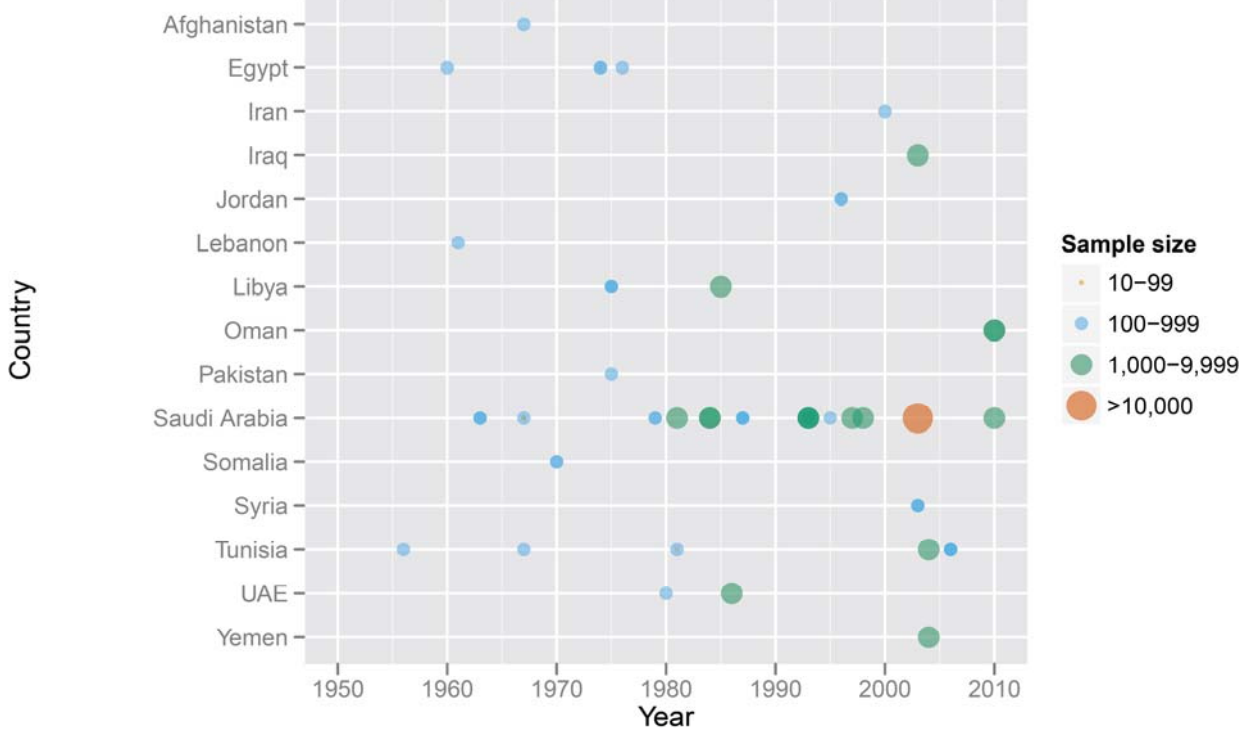

**D. Temporal distribution and size of surveys per country (EURO region)**

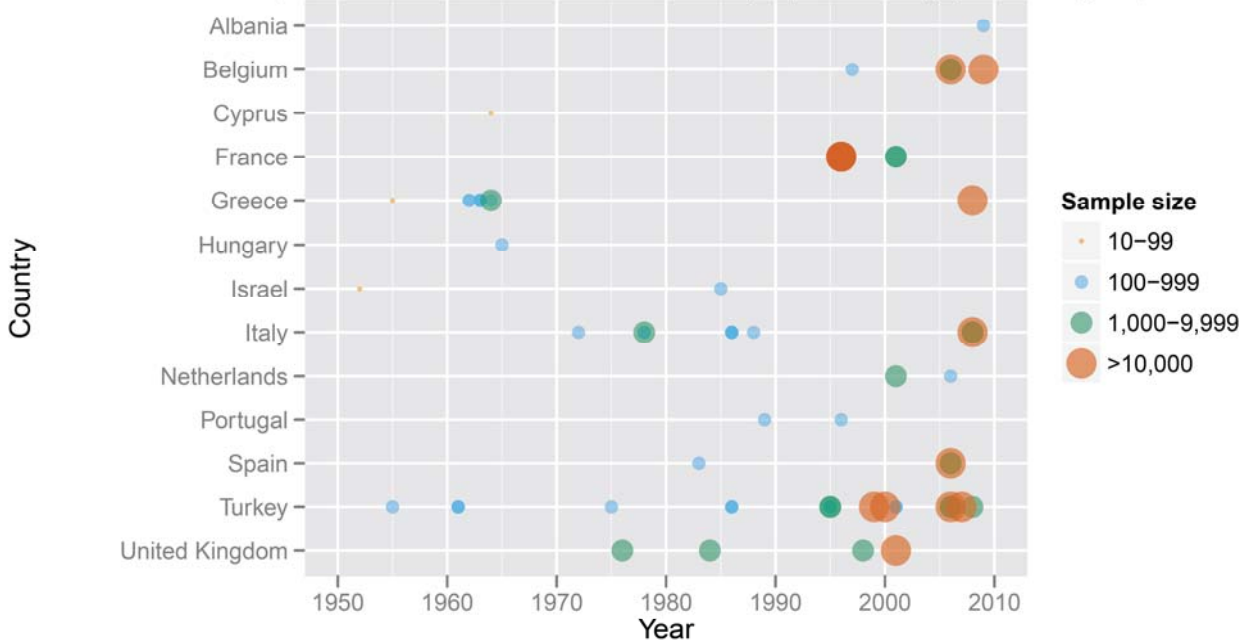

### E. Temporal distribution and size of surveys per country (SEARO region)

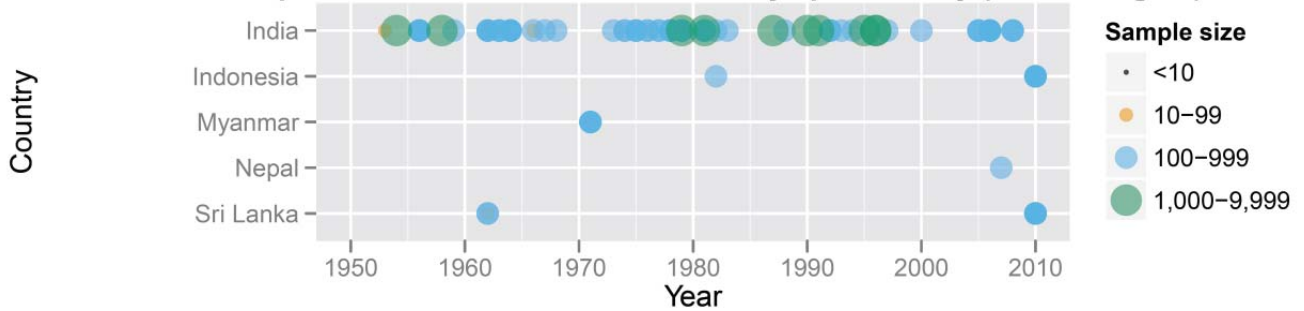

### F. Temporal distribution and size of surveys per country (WPRO region)

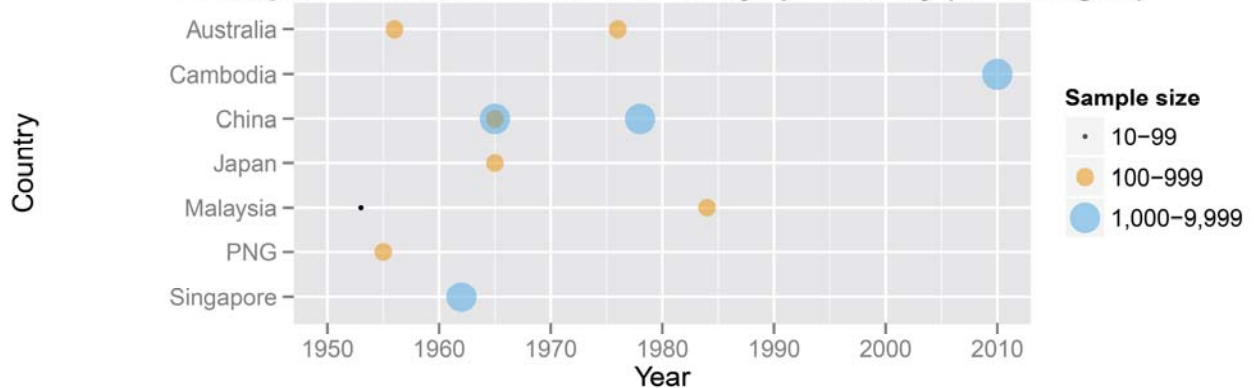

## 2. Creating a map of HbS allele frequency

### Model

In this section, we describe our Bayesian spatial model for the HbS allele frequency surface  $S(\cdot)$ .  $S$  takes as its argument an arbitrary location on the Earth's surface. Because of the scale of this global study, the limited number of datapoints ( $\sim 1,000$ ) and their relatively good spread, we assumed that the sampling bias towards areas of high-prevalence was reasonable. The posterior  $[S]$  induces a posterior  $[SS]$  for the SCA frequency surface  $SS(\cdot)$  since, using the Hardy-Weinberg assumption<sup>7, 8</sup> that an individual's two copies of each allele are chosen independently from a gene pool,  $SS(x) = S(x)^2$ . We computed summaries of  $[SS(x)]$ , such as  $E(SS(x))$  and  $Var(SS(x))$ , at each location  $x$ , to produce the maps related to SCA frequency in neonates.

The model differs from the model employed by Piel et al.<sup>1</sup> because, while conducting the analysis for the current study, we diagnosed a lack of fit in our previous model that did not have a substantial effect on the main summaries of interest of  $[S]$ , but did cause serious errors in  $[SS]$ . This point is discussed below.

The national-level disease burden  $D(A)$  in nation  $A$  can be computed from  $SS$ , the birth rate  $b_A$  in  $A$  and the global population density surface  $N$  using the areal integral

$$D(A) = \int_A b_A N(x) SS(x) da$$

This is a deterministic transformation of  $SS$  and therefore of  $S$ , so theoretically the posterior  $[S]$  induces the posterior  $[D(A)]$ . However, for reasons discussed by Patil et al.,<sup>12</sup> it is prohibitively computationally expensive to sample from this posterior. We produce approximate samples using a method described below.

#### Prior for $S$

We model  $S$  as a nonlinear transformation of a Gaussian random field<sup>12</sup>  $f(\cdot)$ , plus a random field  $\varepsilon(\cdot)$  that associates an independent normally distributed value with each location on the earth's surface. Specifically,

$$S(x) = g(f(x) + \varepsilon(x))$$

The link function  $g$  maps the random variable  $f(x) + \varepsilon(x)$ , which can be any real number, to the interval  $(0,1)$ , so  $S(x)$  can be used as a probability or prevalence. We used a non standard link function, which is described below.

The prior for  $f$  is parameterized from the constant mean function  $M(x) = m$ , and the standard exponential covariance function  $C(x, y) = \varphi^2 \exp\frac{|x-y|}{\theta}$  with amplitude parameter  $\varphi$  and range parameter  $\theta$ , with suitable priors assigned to the scalar parameters  $m$ ,  $\varphi$  and  $\theta$ :

$$p(m) \propto 1$$

$$\varphi \sim \text{Exponential}(.1)$$

$$\theta \sim \text{Exponential}(.1)$$

$$f \sim \text{GP}(M, C)$$

GP indicates a Gaussian process. The units of  $x$ ,  $y$  and  $\theta$  are earth radii, and  $m$  and  $\varphi$  are unitless. The unstructured component  $\varepsilon(x)$  is modelled as normally distributed with unknown variance  $V$ :

$$V \sim \text{Exponential}(.1)$$

$$\varepsilon(x) \stackrel{iid}{\sim} \text{Normal}(0, V, \alpha)$$

A global approach was preferred to a region-specific version of the model because of the limited number of datapoints available for this study.<sup>13</sup> Furthermore, we privileged model stability over flexibility of the model parameters.

Although distances were calculated across oceans, the range parameter of the model was smaller than typical ocean width. Predictions on the eastern coast of Brazil were therefore not influenced by datapoints from West Africa, but strictly by Central and South American datapoints.

## Likelihood

Adopting the assumption of Hardy-Weinberg equilibrium,<sup>7, 8</sup> if  $n_i$  individuals are sampled at the  $i$ 'th observation location  $o_i$  (for a total of  $2n_i$  chromosomes), the probability distribution for the number  $k_i$  of copies of the HbS allele that will be found is binomial, with probability  $S(o_i)$ :

$$k_i \sim \text{Binomial}(2n_i, S(o_i))$$

## Flexible link function and empirical Bayesian analysis

The link function  $g$  for binomial data is usually taken to be the inverse logit function,

$$g(x) = \text{logit}^{-1}(x) = \frac{\exp x}{1 + \exp x}$$

Piel et al.<sup>1</sup> employed this model. Applying the change of variables formula,<sup>14</sup> the induced prior for  $S(x)$  is:

$$p(S(x)) = \frac{1}{S(x)(1 - S(x))} \text{Normal}(\text{logit}(S(x)); m, \varphi^2 + V)$$

Note that this is essentially a two-parameter family of probability distributions, since  $\varphi$  and  $V$  appear only in the sum.

When we initially attempted to fit Piel et al.'s model to the current dataset and predict  $SS$ , we found that, when the local distribution above is fitted in areas where datapoints are highly clustered, the best fitting values of  $m$  and  $\varphi^2 + V$  result in implausibly long right-hand tails for the predictive distribution of prevalence in the next observation at  $x$ . Although the standard summary statistics, including the upper 95% credible interval, were consistent with the local dataset, strikingly high allele frequencies  $S(x)$  (greater than 40%) were predicted with small but practically significant probability ( $\sim 0.1\%$ ).

This particular type of lack of fit was not a major issue for predictions of  $S(x)$  because the bulk of the predictive distribution was roughly consistent with the dataset, but the long right-hand tail translated to an even longer right-hand tail for  $SS(x)$ , which contained enough mass to skew all of the standard summary statistics. For example, the predicted mean of  $SS(x)$  in some areas exceeded 5%, which is higher than all but the observed values in the dataset.

To remedy this problem, we attempted several strategies including employing Stukel's link function<sup>15</sup> in place of the more standard inverse logit, and modelling  $f(x) + \epsilon(x)$  as a skew-Gaussian process<sup>16</sup> rather than the standard Gaussian. The skew-Gaussian approach indicated that it could solve the problem, but eliminated the crucial conjugate relationship between  $f(x)$  and  $f(x) + \epsilon(x)$ , and we were unable to devise a successful Markov chain Monte Carlo (MCMC) scheme.

Ultimately, we employed an alternative flexible link function

$$h(x) = \sum_{i=0}^3 c_i x^i$$

$$g = \text{logit}^{-1} \circ h$$

We were unable to infer  $c_i$  jointly with the other model parameters in a fully Bayesian manner due to poor MCMC mixing, so we adopted an empirical fitting approach inspired by data pre-processing steps employed in classical geostatistics.

#### Empirical Bayesian approach to fitting the polynomial coefficients

For each observation  $(n_i, k_i)$  where  $n_i$  is the sample size and  $k_i$  is the number of HbS alleles, we first obtained the posterior expectation of the gene pool-wide prevalence of HbS with uniform prior density on  $[0,1]$ :

$$\hat{p}_i = \frac{k_i + 1}{2n_i + k_i + 2}$$

We discarded values where  $2n_i$  was below 50. Then, we inferred the parameters  $\tilde{m}$  and  $\tilde{V}$  of the nonspatial Bayesian model:

$$p(\hat{p}) = \prod_i \frac{1}{\hat{p}_i(1 - \hat{p}_i)} \text{Normal}(\text{logit}(\hat{p}_i); \tilde{m}, \tilde{V})$$

We then plotted the posterior predictive cumulative distribution function (CDF) of  $\text{logit}(\hat{p})$  against its empirical CDF, and fitted the coefficients  $c$  of the cubic polynomial function  $h$  to the points using least squares, subject to the constraint that  $h$  must be invertible (or, equivalently, monotone).

In the Bayesian analysis of the full spatial model, the fitted values of  $c$  were taken as known and fixed. Although this empirical procedure is admittedly informal, the resulting nonstandard link function did substantially improve the fit of the model to the data.

#### Prior predictive constraint

Relatively few datapoints are available in areas known to have very low HbS allele frequency, such as the high- and low-latitude regions. The observed allele frequency in these few observations is zero, but more zero observations would be required to rule out the possibility that an occasional area of high allele frequency occurs in these areas. As it happens, the striking local variation in allele frequency in more data-rich and higher-frequency areas in Africa leads the model to conclude that such foci probably *do* occur. Even with the more flexible model for  $\varepsilon(x)$ , the predictive distribution in areas of low data coverage exhibits long right-hand tails, and the predicted mean value of  $S(x)$  in these regions is surprisingly high.

The ideal solution to this problem would be to locate the data behind the common knowledge that HbS allele frequency is low in the high- and low-latitude regions, such as in health service reports, and incorporate it in the model. Given the obvious logistical difficulties associated with this ideal approach, we found it more practical to supplement the dataset with expert opinion (based on authors' and technical advisory group members' knowledge of this gene).

Perhaps the best way to incorporate this expert opinion would be as 'soft data', as described by Christakos<sup>17</sup> among others. However, producing defensible local pseudo-observations of HbS allele frequency all but requires the data collection process we sought to avoid. In addition, using soft datapoints would increase the number of spatial locations at which the Gaussian random field  $f$  has to be imputed, increasing the computational expense of fitting the model.

As a compromise, we elected to constrain  $\varphi$ ,  $m$ , and  $V$  in such a way that the prior predictive distribution of  $S(x)$ , before the data are incorporated, puts probability mass of  $1 \times 10^{-3}$  or less on values in excess of 0.001. This constraint arguably induces a lack of fit by forcing  $f(x)$  to depart from its prior mean by many standard deviations in areas where HbS allele frequency is known to be high; but it does remedy the implausibly high predictive values in the polar regions, and does not seem to adversely affect the fit in areas of nonzero allele frequency.

### Fitting the model

The model was fitted using a MCMC algorithm<sup>18</sup> implemented in the programming language Python using the Bayesian analysis package PyMC.<sup>19</sup>

The scalar parameters  $\varphi$ ,  $m$ ,  $\theta$  and  $V$  were updated jointly using Haario, Saksman and Tamminen's adaptive Metropolis algorithm,<sup>20</sup> as implemented by PyMC's AdaptiveMetropolis step method. Each value  $\varepsilon(o_i)$  at observation location  $o_i$  was updated separately using the standard one-at-a-time Metropolis algorithm. The

distribution of the Gaussian random field at the observation locations,  $\{f(o_i)\}$ , is conjugate to the distribution of  $\{\epsilon(o_i) + f(o_i)\}$ , so we updated  $\{f(o_i)\}$  by sampling from its full conditional distribution. MCMC output parameter values based on 1,000,000 iterations are summarised in Web Table 5.

The polynomial coefficients for such a function are specific to the dataset. The set of coefficients used, corresponding to an invertible function and fitting the empirical cumulative distribution function was:

$$y = -1.48556762x^3 + 0.28125179x^2 + 0.02261485x + 0.02125477$$

The code implementing the analysis is available at <http://github.com/malaria-atlas-project/ibd-world> and <http://github.com/malaria-atlas-project/generic-mbg>. Traces for all variables are available upon request.

### Mapping procedure

Interpolating spatially sparse survey data to predict an allele frequency across a wide region results in predictions for which the level of certainty (or uncertainty) varies spatially as a function of the density, quality, and sample size of survey data available. The underlying spatial heterogeneity of the frequency of the disorder studied, known to be high in some areas for HbS,<sup>1-4</sup> also influences this uncertainty. A Bayesian MBG framework<sup>21</sup> generates a posterior predictive distribution (PPD) rather than a unique value, therefore allowing estimation of the uncertainty of the prediction for each pixel. In addition to the PPDs of HbS allele frequency, HbAS and HbSS genotype frequencies were also generated directly by the model. Because these are nonlinear functions of the allele frequency, it would be incorrect to produce summary maps of these quantities from those of allele frequency using GIS software.<sup>12</sup> Here, we used the mean as a per-pixel visual summary of the PPD. The summary map is shown at a 5 × 5 km resolution (Figure 2B).

The uncertainty is a crucial measure of the accuracy of the prediction. It is based on the abundance of data, the sample sizes and the homogeneity or heterogeneity of the data around a pixel. From the range of possible uncertainty intervals available from the model's output, we chose here to use the interquartile range (IQR) of the posterior distribution,<sup>22</sup> corresponding to a 50% probability (Figure 2C). This corresponds to the *mbg-map* command of the generic MBG package.

### Validation and model performance metrics

In addition to the model-based representations of prediction uncertainty provided by the MBG framework, the model's predictive ability was quantified by assessing the disparity between the prediction and the observed allele frequency using a validation subset of the data. Ten percent of the data (n=121), randomly selected, were held out from the dataset (Web Figure 4). The model was run in full using the thinned data



set (n=1,090) to generate HbS PPD for comparing the mean of the prediction with known values at the locations of the held-out data (Web Figure 5A).

**Web Figure 4** Distribution of the validation subsets. Black dots represent datapoints used in the thinned dataset. Circles represent datapoints held out for the model validation.

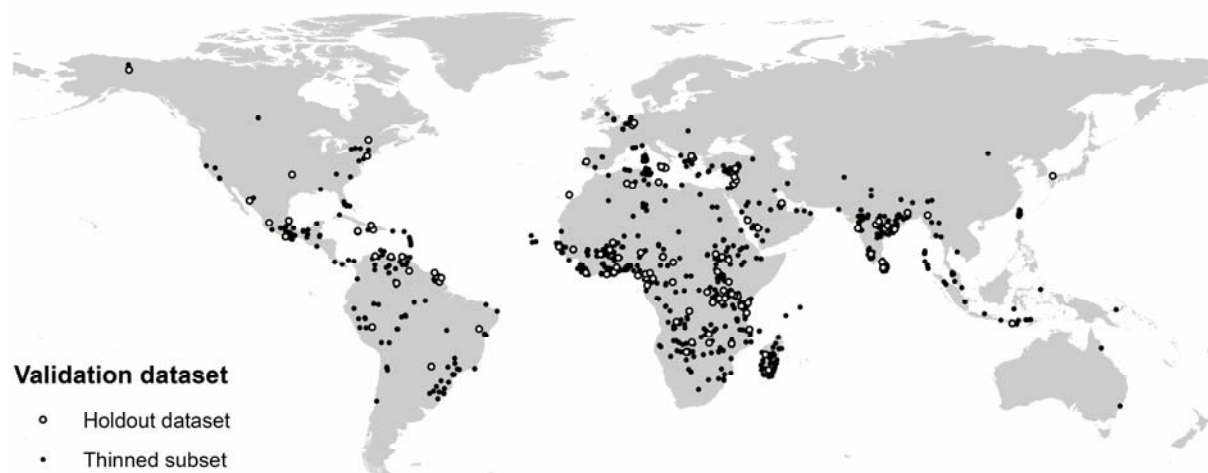

The prediction's mean error (ME) and mean absolute error (MAE) were used to assess the model's overall bias and overall accuracy respectively. The ME is the average distance between the actual datapoints and the predicted values. The MAE is a measure of the average magnitude of the errors in the predicted values. A procedure was also implemented to test the extent to which PPDs at each location provided a suitable measure of uncertainty.<sup>23, 24</sup> Working through 100 progressively narrower credible intervals (CIs), from the 99% CI to the 1% CI, each was tested by computing the actual proportion of held-out prevalence observations that fell within the predicted CI. In a perfect model, 95% of true values should fall within the 95% CI predicted at each location, 50% within the 50% CI, and so on. Plotting these actual proportions against each predicted CI level allows the overall fidelity of the posterior probability distributions predicted at the held-out data locations to be assessed (Web Figure 5B). This corresponds to the *mbg-validate* command of the generic MBG package.

**Web Figure 5** Validation plots comparing the prediction with the observed allele frequency for the datapoints from the hold-out subset of the data (n=121). A. Scatter plot of the observed vs. predicted allele frequency; B. Plot of the observed vs. predicted quantiles.

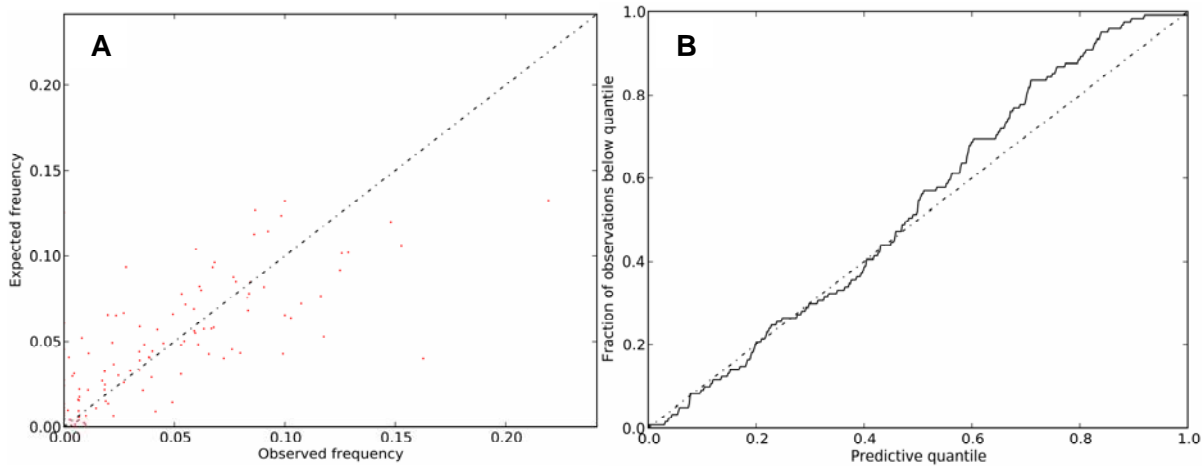

### 3. Historical vs. contemporary maps

A map of the historical distribution of sickle haemoglobin has been published.<sup>1</sup> Although the methodology used to assemble the dataset, to identify surveys fulfilling inclusion criteria, to georeference the location of the survey and to create a continuous map within a Bayesian geostatistical framework are broadly similar to the methodology described here, fundamental differences exist between these two maps.

The historical map, published in 2010,<sup>1</sup> is based only on population samples which were representative of an indigenous population. We considered populations surveyed to be indigenous, if no information was available from the author(s) to indicate that the population did not evolve locally in relation to the historical prevalence of malaria. Non-native populations surveyed in the Americas or Western Europe, for example, were therefore excluded. A total of 773 surveys were included. This map aims at describing the distribution of sickle haemoglobin as a result of the selection pressure of malaria on the genetics of human populations.

The contemporary map, presented in this paper, is based on all representative population samples, whether indigenous or not. A much larger total of 1,211 surveys were included. This map aims at describing the current distribution of sickle haemoglobin as a result of both malaria selection and human diasporas, in order to estimate the number of individuals affected in 2010 at national, regional and global scales. This map is a continuous global surface of the frequency predictions made within our Bayesian geostatistical framework; frequency predictions combined with demographic data then allowed calculating population estimates and their associated uncertainty.

## References

1. Piel FB, Patil AP, Howes RE, Nyangiri OA, Gething PW, Williams TN, et al. Global distribution of the sickle cell gene and geographical confirmation of the malaria hypothesis. *Nat Commun.* 2010; **1**: 104.
2. Hay SI, Snow RW. The Malaria Atlas Project: developing global maps of malaria risk. *PLoS Med.* 2006; **3**(12): e473.
3. Guerra C, Hay S, Lucioparedes L, Gikandi P, Tatem A, Noor A, et al. Assembling a global database of malaria parasite prevalence for the Malaria Atlas Project. *Malaria J.* 2007; **6**(1): 17.
4. Livingstone FB. Frequencies of hemoglobin variants: thalassemia, the glucose-6-phosphate dehydrogenase deficiency, G6Pd variants and ovalocytosis in human populations. New York: Oxford University Press; 1985.
5. Malaria Genomic Epidemiology Network Consortium. A global network for investigating the genomic epidemiology of malaria. *Nature.* 2008; **456**(7223): 732-7.
6. Hay SI, Guerra CA, Gething PW, Patil AP, Tatem AJ, Noor AM, et al. A world malaria map: *Plasmodium falciparum* endemicity in 2007. *PLoS Med.* 2009; **6**(3): e1000048.
7. Hardy GH. Mendelian proportions in a mixed population. *Science.* 1908; **28**(706): 49-50.
8. Weinberg W. Über den Nachweis der Vererbung beim Menschen. *Jahresh Wuertht Verh Vaterl Naturkd.* 1908; **64**: 369-82.
9. Serjeant GR, Serjeant BE. Sickle cell disease: Oxford University Press; 2001.
10. Weatherall DJ, Clegg JB. The thalassaemia syndromes. Fourth ed. Oxford: Blackwell Science; 2001.
11. Cavalli-Sforza LL, Menozzi P, Piazza A. The history and geography of human genes. Princeton, New Jersey, USA: Princeton University Press; 1994.
12. Patil AP, Gething PW, Piel FB, Hay SI. Bayesian geostatistics in health cartography: the perspective of malaria. *Trends Parasitol.* 2011; **27**(6): 246-53.
13. Diggle PJ, Menezes R, Su T-I. Geostatistical inference under preferential sampling. *Journal of the Royal Statistical Society: Series C (Applied Statistics).* 2010; **59**(2): 191-232.
14. Hogg RV, McKean JW, Craig AT. Introduction to mathematical statistics. 6th ed: Pearson; 2005.
15. Stukel TA. Generalized Logistic Models. *J Am Stat Assoc.* 1988; **83**(402): 426-31.
16. Azzalini A, Capitanio A. Statistical applications of the multivariate skew normal distribution. *Journal of the Royal Statistical Society: Series B (Statistical Methodology).* 1999; **61**(3): 579-602.
17. Christakos G. Modern spatiotemporal geostatistics. USA: Oxford University Press; 2000.
18. Gilks WR, Richardson S, Spiegelhalter D. Markov chain Monte Carlo in practice: Chapman & Hall/CRC; 1995.
19. Patil AP, Huard D, Fonnesbeck CJ. PyMC: Bayesian stochastic modelling in Python. *J Stat Softw.* 2010; **35**(4): 1-81.
20. Haario H, Saksman E, Tamminen J. An Adaptive Metropolis Algorithm. *Bernoulli.* 2001; **7**(2): 223-42.
21. Diggle PJ, Ribeiro Jr PJ. Model-based geostatistics: Springer; 2007.
22. Patil A, Okiro E, Gething P, Guerra C, Sharma S, Snow R, et al. Defining the relationship between *Plasmodium falciparum* parasite rate and clinical disease: statistical models for disease burden estimation. *Malaria J.* 2009; **8**(1): 186.
23. Gething PW, Noor AM, Gikandi P, Hay SI, Nixon MS, Snow RW, et al. Developing geostatistical space time models to predict outpatient treatment burdens from incomplete national data. *Geogr Anal.* 2008; **40**: 167-88.
24. Moeed R, Papritz A. An Empirical Comparison of Kriging Methods for Nonlinear Spatial Point Prediction. *Math Geol.* 2002; **34**(4): 365-86.

## Web Appendix 2. Newborn estimates.

The best way to know with precision the number of neonates affected by a genetic disorder (such as sickle haemoglobin) at the national level is to conduct a universal national screening programme at birth. Although such programmes have proven their benefits,<sup>1-3</sup> they are in place only in a handful of countries, none of which are in Africa where the most affected populations are living.<sup>4</sup> In addition to adding data from recent surveys and refining the modelling methodology (see Web Appendix 1), using the highest resolution available for demographic data can help refining estimates of neonates affected.

### 1. Demographic data

Both HbS allele frequency and population density are highly variable between pixels within countries. The HbS allele frequency map aims to include spatial heterogeneities revealed by population surveys. National estimates therefore depend on whether areas of high or low frequencies are highly populated or not. Rather than using crudely averaged data for each country, we combined our contemporary allele frequency map with high resolution population data to deal with this issue. The Global Rural Urban Mapping Project (GRUMP) *beta* version provides gridded population counts and population density estimates at 1×1 km spatial resolution for the years 1990, 1995 and 2000, both adjusted and unadjusted to the United Nations national population estimates.<sup>5</sup> We used adjusted population counts for the year 2000 projected to 2010 described previously.<sup>6</sup> The urban growth rates were applied to populations residing within the GRUMP-defined urban extents, and the rural rates were applied elsewhere. National 2010 totals were then adjusted to match those estimated by the United Nations.<sup>7</sup> Population density is shown in Web Figure 6.

**Web Figure 6.** Global human population in 2010. Number of individuals per pixel (1x1 km) from the Global Rural and Urban Mapping Project, beta version.

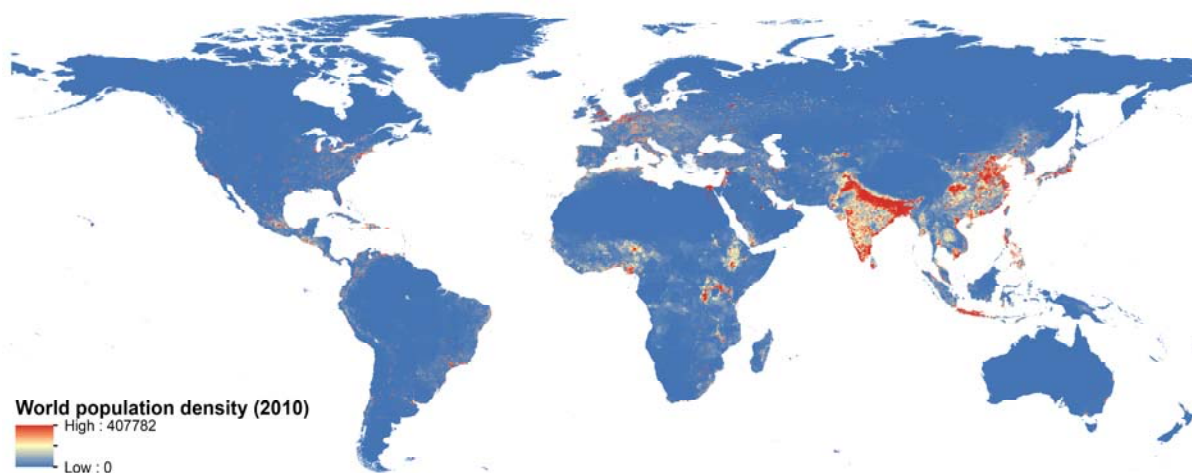

Mortality data are currently insufficient for calculating prevalence estimates across whole populations, so we focus here on neonates using Hardy-Weinberg assumptions.<sup>8, 9</sup> Assuming random mating and large population sizes, it is possible to estimate the HbS allele frequency and the proportions of each genotype (AA, AS and SS) from the number of heterozygote individuals observed in the population sample.<sup>10</sup> Conceptually, the number of AS and SS babies born per year can be obtained by multiplying a function of HbS allele frequency ( $2p(1 - p)$  and  $p^2$  respectively) by the population living within the area of interest and the crude birth rate (CBR). CBRs are not consistently available globally at a finer resolution than the country level, hence the use of data from the United Nations Population Prospects for the 2010-2015 period<sup>11</sup> (Web Figure 7).

**Web Figure 7.** Crude birth rate per country. Data from the United Nations World Population Prospects: The 2010 Revision Population Database (<http://esa.un.org/unpd/wpp/>). The rates are for 2010 and are expressed in neonates per thousand (000s).

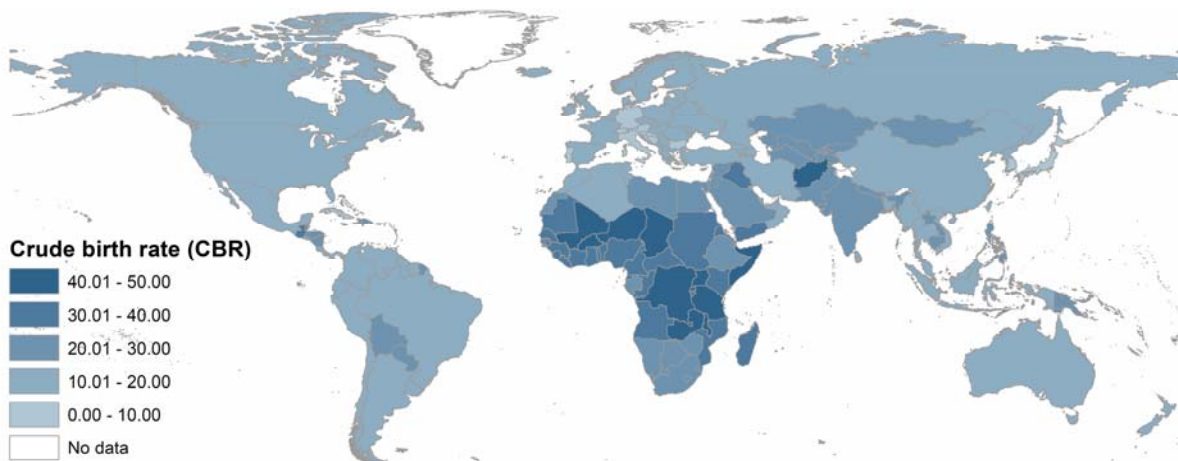

## 2. Areal predictions

As described previously,<sup>12</sup> one needs to be careful when predicting integrals over spatial areas. Using traditional geographic information system (GIS) methods, a researcher having access to a map of HbS allele frequency ( $S(x)$ ) and desiring a national proportion of individuals with the SS genotype ( $SS(x)$ ), would take the square of  $S(x)$  and then average the values over the various pixels falling within the country of interest, weighted by population (Web Figure 6). This approach has limitations when the map of allele frequency is uncertain. Squaring the mean map for  $S(x)$  does not yield the mean map for  $SS(x)$  and it is impossible to produce any assessment of the uncertainty of the areal average from summary maps alone.<sup>12</sup>

To develop a correct procedure for producing predictive distributions for national proportions, we began by considering what we would do if we had the true map of HbS allele frequency in hand. As stated above, the national-level disease burden  $D(A)$  in nation  $A$  can be computed from  $S$ , the birth rate  $b_A$  in  $A$  and the global population density surface  $N$  using the areal integral:

$$D(A) = \int_A b_A N(x) S(x)^2 da \quad (1)$$

In reality, the allele frequency map  $S$  is unknown. We do not know its exact value, but we have a posterior distribution  $[S]$  for it, from which samples can be drawn. Because applying equation 1 to a sample from  $[S]$  generates a sample from  $[D(A)]$ , many samples from  $[S]$  can be used to build up a histogram approximating  $[D(A)]$ .<sup>12</sup> Summaries such as the mean, median, variance and credible intervals can be approximated using these samples.

Although it is mathematically correct, this procedure is impractical to implement. We have an approximation of  $[S]$  in the form of the MCMC trace, but generating samples from it at an appropriately high resolution is extremely computationally expensive.<sup>12</sup> We use an approximate procedure based on the fact that, if  $z_1$  is a single-element binomial process on  $A$  with intensity  $d$ ,

$$\frac{\int_A S(x)^2 d(x) da}{\int_A d(x) da} = E(S(z_1)^2) \quad (2)$$

Furthermore, if  $z_i$  is an  $l$ -element binomial process on  $a$  with intensity  $d$ ,

$$E(S(z_1)^2) = \lim_{l \rightarrow \infty} \frac{1}{l} \sum_{i=1}^l g(S(z_i)^2) \quad (3)$$

The expectation of the term inside the limit is equal to the left-hand term, but its variance is smaller than that of  $S(z_1)$ .

The pseudocode for our procedure, based on this approximation, was as follows:

1. Generate an  $l$ -element binomial process on  $A$ ,  $z_i$ , with intensity  $N$ .
2. For each value in the thinned MCMC trace for the scalar parameters and the Gaussian random field  $f$  evaluated at the observation locations  $\{o_i\}$ ,  $\{f(o_i)\}$ ,
  - o Draw a value for the  $l$ -element random vector  $\{f(z_i)\}$  from its full conditional distribution.
  - o Convert these values to  $\{S(z_i)\}$  by applying the inverse-logit link function.

- Square these values to obtain a sample for the value of the desired genotype frequencies  $\{S(z_i)^2\}$ .
- Compute the arithmetic mean of this sample and store.

To estimate the Monte Carlo standard error (SE) attributable to the use of a set of  $l$  spatial locations rather than a high-resolution raster grid, we repeated all computations ten times and recorded the sample standard deviations of all summaries (mean, median, etc.). The point estimates that we report were obtained by aggregating the samples from all repetitions.

This procedure was conducted using  $l = 30,000, 10,000, 1,000$  and  $500$  spatial points for the global, regional, national and sub-national areal estimates respectively; with 10% of the parameter samples in the dynamic trace, selected at random; and 1,000 iterations. As this resulted in a full PPD for each areal unit of interest, various parameters could be used to summarize the predicted estimates and their uncertainty. Here, we used the median and the interquartile range (IQR).

The modelled surfaces and population estimates presented here are made available in the public domain with the publication of this article via the Malaria Atlas Project (MAP) website (<http://www.map.ox.ac.uk>), with maps available at the global scale and population estimates at global, regional and national scales. The creation of an interactive online resource for open-access distribution of HbS modelled surfaces and estimates of newborns affected, is part of the ongoing development of the ROAD-MAP online database.

### **3. Model validation and performance metrics**

In order to quantify the error in our areal estimation process, we performed the procedure described above ten times. Each repetition used a different subset of the dynamic tracefile and was therefore independent from previous repetitions. This method allowed us to calculate the Monte Carlo SE<sup>13, 14</sup> for any summary parameter chosen. The results are summarised in Table 1, Web Table 2 and Web Table 3 for the global, national and sub-national estimates respectively.

### **4. The use of modified WHO regions**

The historical distribution of sickle haemoglobin has been explained by the selective advantage that it confers against malaria. Frequency maps of historical malaria and HbS frequencies therefore correlate on a global scale.<sup>15</sup> Recent changes however, are unbalancing this relationship, both in malaria-endemic and non-endemic regions. Many historically malaria endemic regions are undergoing epidemiological shifts, and it is

projected that genetic disorders in these regions will have increasingly prominent public health burdens in future years.<sup>16-18</sup> Increases in genetic disorder burdens are also expected in non-malaria endemic regions as human migrations continue to import the sickle gene into these regions. It is important, therefore, to consider estimates of sickle haemoglobin within these epidemiologically-relevant regions. Maps of malaria endemic countries have been recently published by the MAP.<sup>19,20</sup> In addition, several haplotypes for the HbS mutation have been identified and designated by their geographic area of origin: Senegal, Benin, Cameroon and Arab-Indian.<sup>21-23</sup> Based on current knowledge, it seems that the Arab-Indian haplotype, which has been observed in India and the eastern part of Saudi Arabia and surrounding countries, has milder clinical severity than the African haplotypes.<sup>21,24</sup>

**Web Figure 8.** WHO and HbS regions. A. WHO regions. AFRO: regional office for Africa; AMRO: regional office for the Americas; EMRO: regional office for Eastern Mediterranean; EURO: regional office for Europe; SEARO: regional office for South-East Asia; WPRO: regional office for the Western Pacific. See <http://www.who.int/about/regions/en/index.html> for further detail. B. HbS regions. WHO modified regions based on sickle cell haplotypes<sup>21-23</sup> and malaria endemicity.<sup>20</sup>

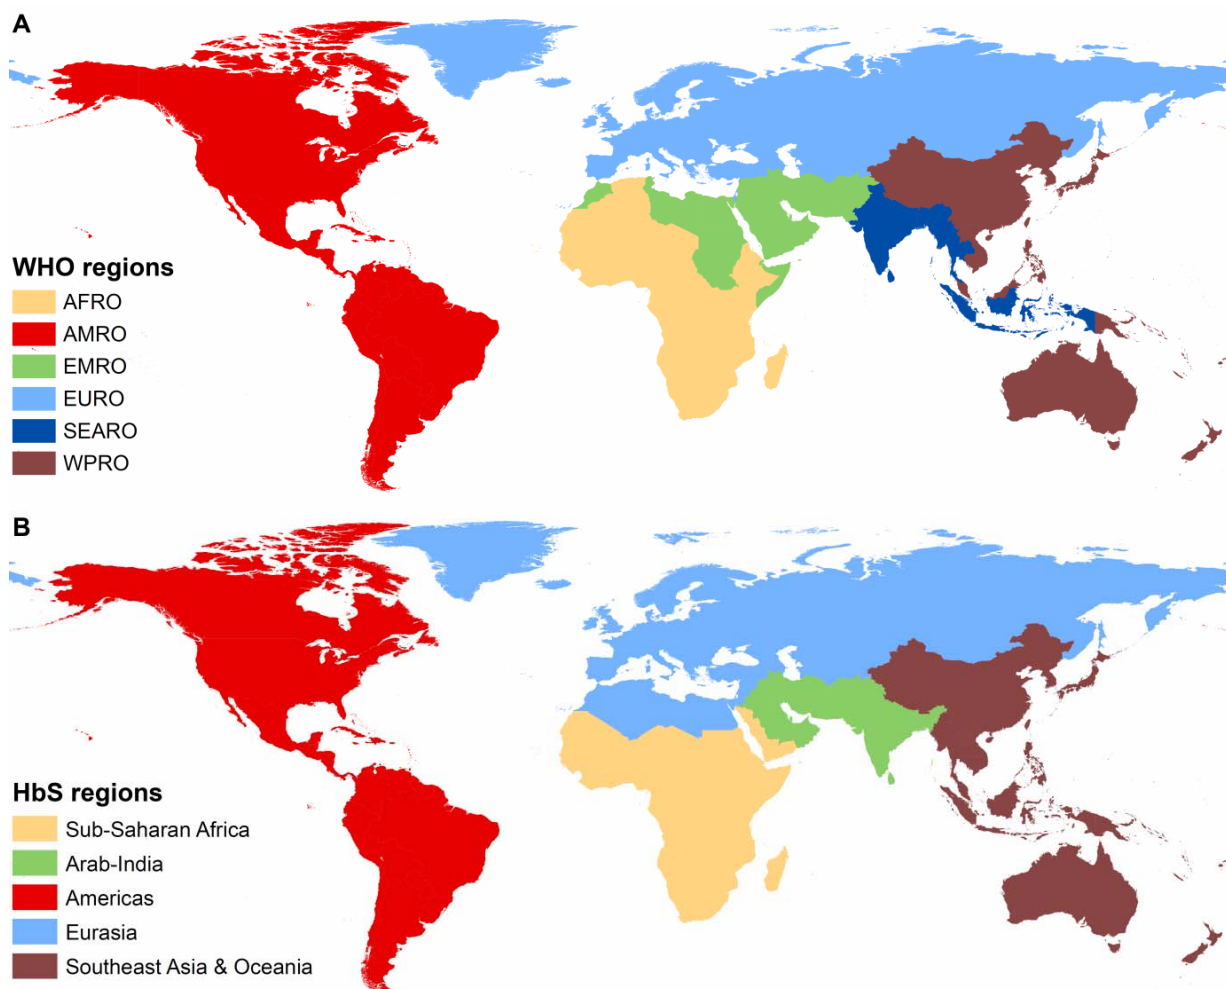



Because of the influence of these two factors on the dynamics, and complications related to HbS respectively, which both have implications for public health policies, we have presented our estimates within modified WHO regions (Web Figure 8) alongside estimates within WHO regions. These regions are: i) the Americas, corresponding exactly to the AMRO region; ii) Eurasia which includes Russia, Mongolia, as well as European and other Mediterranean countries; iii) sub-Saharan Africa which also includes the western part of Saudi Arabia and Yemen; iv) Arab-India which extends from eastern Saudi Arabia and Oman to India; v) Southeast Asia, including China, and Oceania. To allow comparisons with previous estimates,<sup>25</sup> all results are presented within both WHO and modified WHO regions.

## **5. Comparison of national estimates with Modell and Darlison's (M&D)**

We compared our national estimates of SS neonates with unpublished estimates calculated by Modell and Darlison (M&D) in 2008.<sup>25</sup> M&D aimed at presenting “the most conservative [estimates] permitted by the data (i.e. give minimum figures)”, based on demographic data from the 2003 UN Demographic Yearbook. In the present study, we aimed at providing the best summary of our current knowledge and of the precision associated with these estimates. It is therefore logical that our national estimates for 2010 tend to be higher than those calculated by M&D as illustrated in Figure 3. This can be explained by various methodological differences including: i) the use of an updated dataset based on strict inclusion criteria; ii) the use of a state-of-the-art modelling geostatistical framework, unconstrained by national boundaries and accounting for spatial heterogeneities; iii) the use of up to date demographic data; and iv) weighting each pixel estimate by population density data, so that, for example, highly populated areas with high frequencies are better represented.

We first compared absolute numbers of neonates affected. Within the AFRO region (Figure 3A), the biggest difference was in the DRC with our median estimate being approximately twice that of M&D. Their estimate for Nigeria fell within our IQR. Important differences appeared for Sudan and Kenya for which relatively large numbers of surveys (32 and 51 respectively) were used in our model. For the AMRO countries (Figure 3B), our median estimates for Brazil and the USA are approximately three times higher than M&D's. Although 47 and 25 surveys respectively were included in our model, they tended to be clustered and targeted areas of high prevalence. This contributes to the large IQR associated with our predictions. Large differences were also observed in Haiti, Mexico, Venezuela and most Central American countries. Within the EMRO region (Figure 3C), M&D's estimate for Saudi Arabia was more than five times higher than ours which has a small IQR. For Egypt, the Syrian Arab Republic and Iran, our median estimates are higher, and the IQRs were relatively large. In the EURO countries (Figure 3D), our median estimates are higher for most Western

European countries, as well as for Turkey and Israel, but IQRs are large. Within the SEARO region (Figure 3E), the only difference appeared in India for which our median estimate is 1.6 times higher than M&D's. For the WPRO countries (Figure 3F), numbers are low but differences appeared for Australia and New Zealand.

We also looked at the rate of affected neonates per thousand overall conceptions as a relative comparison measure. This rate, calculated as the ratio between the number of affected neonates (AS or SS) and the product of the population and crude birth rate within the area considered, given in per thousand (Web Table 4), can facilitate comparisons with previous and future estimates, as well as with estimates for other disorders. M&D global and regional rates were calculated using the sum of regional and national estimates respectively. MAP global and regional estimates are based on our areal predictions. These rates have also been included in Web Table 4.

## **6. National newborn screening programme data**

Worldwide, only a few high-income, non-malarious countries, with relatively low haemoglobinopathy prevalence, have implemented a national universal newborn screening for sickle haemoglobin. These countries include the United States of America (USA), England and the French Overseas Departments and Territories. A targeted screening programme focussing on populations at risk is in place in France. Some African countries (e.g. Ghana)<sup>26</sup> have recently started to implement pilot screening programmes for haemoglobinopathies but no screening-based national estimates were available for this study.

In the USA, universal newborn screening for sickle cell homozygotes (SS), sickle cell carriers (AS) and compound heterozygotes with HbS and HbC (SC) is now either required by law, by an official rule or fully implemented in all states.<sup>27</sup> Since 2005, part of this data is centralized into the National Newborn Screening Information System (NNSIS, <http://nnsis.uthscsa.edu/>) on a voluntary reporting basis. Although incomplete, due to the absence of any reports from some states and the lack of spatial resolution, this is the only national resource currently available. Haemoglobin reports from the NNSIS included the total number of cases detected per year. Such data were available for most states from 2001 to 2010. Based on reported data, the annual number of SS neonates in the USA was 1,213 in 2001 (50 states/territories), 1,166 in 2002 (47 states/territories), 1,141 in 2003 (48 states/territories), 1,056 in 2004 (58 states/territories), 1,047 in 2005 (50 states/territories), 1,057 in 2006 (49 states/territories), 988 in 2007 (44 states/territories), 1,029 in 2008 (42 states/territories), 883 in 2009 (36 states/territories), and 783 in 2010 (32 states/territories). Using all data available, the annual average number of SS neonates over that period was 1,123. Based on the 25 population representative surveys used in our model, our estimate for the USA was 2,843 SS (IQR: 2,038-

3,968) neonates. Our estimate is therefore at least twice as high as suggested by the NNSIS reported data. Potential explanations for this include i) the relatively small number of surveys available for such a large country; ii) the heterogeneous distribution of ethnic groups mostly affected (not included in our model); and iii) potential discrepancies between data collected locally and data reported in the NNSIS data.

In England, the National Health System (NHS) Sickle Cell and Thalassaemia Screening Programme was launched in 2001. It collects data from 152 antenatal laboratories and 13 newborn laboratories.<sup>28</sup> Based on data from April 2005 to March 2007, 10,000 AS neonates were identified amongst 1,069,173 babies screened (89% of all babies born in England).<sup>1</sup> The report estimates that this represents 90% of the total actual number of carriers. Considering 748,990 neonates for 2010,<sup>11</sup> applying the same ratio would result in 7,783 AS neonates. No number for SS neonates was available. Based on the four population surveys included in our global model, our estimate for England was 14,509 (IQR: 10,263-20,013) AS and 269 (IQR: 150-466) SS neonates. Our estimate of AS neonates appeared therefore slightly higher than what could be expected from national screening programme data. This probably results from the opportunistic sampling of published surveys used in our model, which focus mostly on populations at risk.

In France and the French Overseas Departments and Territories, there is currently no central database to give precise figures on the number of neonates affected by HbS. Cumulative data from 1996 to 2007, based on the screening of 2,622,870 neonates, identified 64,269 AS and 2,917 SS or S $\beta$ <sup>0</sup> thalassaemia babies respectively.<sup>29</sup> Using the total number of neonates in 2010 (n=832,799),<sup>30</sup> the annual number of AS neonates based on the above ratio would be 20,416 which is consistent with our estimate of 22,040 (IQR: 15,621-30,597) AS neonates. For Guadeloupe, Martinique and Réunion, our estimates were 459 (IQR: 343-594) AS and 14 (IQR: 8-22) SS; 391 (IQR: 300-496) AS and 12 (IQR: 8-19) SS; 6 (IQR: 0-110) AS and 0 (IQR: 0-1) SS neonates respectively. No detailed data from the universal screening programme in place in these French Overseas Departments and Territories could be accessed for comparison.

The inclusion of the complete data from national screening programmes for each maternity or testing centre would obviously result in much better estimates, but collecting these data was beyond the scope of the present study. Moreover, it appeared that existing infrastructures do not allow optimal management and centralisation of data collected locally. Further work on improving the management of these data would therefore be useful, particularly for developing countries aiming at launching a national screening programme.

## References

1. Streetly A, Latinovic R, Henthorn J. Positive screening and carrier results for the England-wide universal newborn sickle cell screening programme by ethnicity and area for 2005-07. *J Clin Pathol.* 2010; **63**(7): 626-9.
2. Bouva MJ, Mohrmann K, Brinkman HBJM, Kemper-Proper EA, Elvers B, Loeber JG, et al. Implementing neonatal screening for haemoglobinopathies in the Netherlands. *J Med Screen.* 2010; **17**(2): 58-65.
3. van Heyningen AM, Levenston MJ, Tamminga N, Scoop-Martijn EG, Wever RM, Verhagen AA, et al. Estimated incidence of sickle-cell disease in Aruba and St. Maarten suggests cost-effectiveness of a universal screening programme for St. Maarten. *The West Indian medical journal.* 2009; **58**(4): 301-4.
4. Weatherall D, Akinyanju O, Fucharoen S, Olivieri N, Musgrove P. *Inherited disorders of hemoglobin. Disease control priorities in developing countries (2nd Edition).* New York: Oxford University Press; 2006. p. 663-80.
5. Balk DL, Deichmann U, Yetman G, Pozzi F, Hay SI, Nelson A. Determining global population distribution: methods, applications and data. *Adv Parasitol.* 2006; **62**: 119-56.
6. Guerra CA, Howes RE, Patil AP, Gething PW, Van Boeckel TP, Temperley WH, et al. The international limits and population at risk of *Plasmodium vivax* transmission in 2009. *PLoS Negl Trop Dis.* 2010; **4**(8): e774.
7. Gething PW, Patil AP, Guerra CA, Elyazar IR, Tatem AJ, Smith DL, et al. A Revised World Malaria Map: *Plasmodium falciparum* Endemicity in 2010. *Malaria J.* **Under review.**
8. Hardy GH. Mendelian proportions in a mixed population. *Science.* 1908; **28**(706): 49-50.
9. Weinberg W. Über den Nachweis der Vererbung beim Menschen. *Jahresh Wuertht Verh Vaterl Naturkd.* 1908; **64**: 369-82.
10. Grosse SD, Odame I, Atrash HK, Amendah D, Piel FB, Williams TN. Sickle cell disease in Africa: a neglected cause of early childhood mortality. *Am J Prev Med.* 2011; **41**(6S4): S398-S405.
11. World population prospects: The 2010 revision. <http://esa.un.org/unpp>. Date accessed: July 15, 2011.
12. Patil AP, Gething PW, Piel FB, Hay SI. Bayesian geostatistics in health cartography: the perspective of malaria. *Trends Parasitol.* 2011; **27**(6): 246-53.
13. Gilks WR, Richardson S, Spiegelhalter D. *Markov chain Monte Carlo in practice:* Chapman & Hall/CRC; 1995.
14. Diggle PJ, Ribeiro Jr PJ. *Model-based geostatistics:* Springer; 2007.
15. Piel FB, Patil AP, Howes RE, Nyangiri OA, Gething PW, Williams TN, et al. Global distribution of the sickle cell gene and geographical confirmation of the malaria hypothesis. *Nat Commun.* 2010; **1**: 104.
16. Weatherall DJ, Clegg JB. Inherited haemoglobin disorders: an increasing global health problem. *Bull World Health Organ.* 2001; **79**(8): 704-12.
17. Weatherall DJ. The challenge of haemoglobinopathies in resource-poor countries. *Br J Haematol.* 2011; **154**(6): 736-44.
18. Weatherall DJ. The inherited diseases of hemoglobin are an emerging global health burden. *Blood.* 2010; **115**(22): 4331-6.
19. Hay SI, Guerra CA, Gething PW, Patil AP, Tatem AJ, Noor AM, et al. A world malaria map: *Plasmodium falciparum* endemicity in 2007. *PLoS Med.* 2009; **6**(3): e1000048.
20. Hay SI, Okiro EA, Gething PW, Patil AP, Tatem AJ, Guerra CA, et al. Estimating the global clinical burden of *Plasmodium falciparum* malaria in 2007. *PLoS Med.* 2010; **7**(6): e1000290.
21. Flint J, Harding RM, Boyce AJ, Clegg JB. The population genetics of the haemoglobinopathies. *Baillieres Clin Haematol.* 1993; **6**(1): 215-62.
22. Gabriel A, Przybylski J. Sickle-cell anemia: a look at global haplotype distribution. *Nature Education.* 2010; **3**(3): 2.
23. Ragusa A, Lombardo M, Sortino G, Lombardo T, Nagel RL, Labie D. Beta S gene in Sicily is in linkage disequilibrium with the Benin haplotype: implications for gene flow. *Am J Hematol.* 1988; **27**(2): 139-41.

24. Oner C, Dimovski AJ, Olivieri NF, Schiliro G, Codrington JF, Fattoum S, et al. Beta S haplotypes in various world populations. *Hum Genet.* 1992; **89**(1): 99-104.
25. Modell B, Darlison M. Global epidemiology of haemoglobin disorders and derived service indicators. *Bull World Health Organ.* 2008; **86**(6): 480-7.
26. Ohene-Frempong K, Oduro J, Tetteh H, Nkrumah F. Screening newborns for sickle cell disease in Ghana. *Pediatrics.* 2008; **121**: S120-S1.
27. National Newborn Screening Status Report. [genes-r-us.uthscsa.edu/nbsdisorders.pdf](http://genes-r-us.uthscsa.edu/nbsdisorders.pdf). Date accessed: 26/09/2011.
28. Streetly A. A national screening policy for sickle cell disease and thalassaemia major for the United Kingdom. *Br Med J.* 2000; **320**(7246): 1353-4.
29. Bardakdjian-Michau J, Bahuau M, Hurtrel D, Godart C, Riou J, Mathis M, et al. Neonatal screening for sickle cell disease in France. *J Clin Pathol.* 2009; **62**(1): 31-3.
30. National Institute of Statistics and Economic Studies (INSEE). [cited 24/10/2011]; Available from: <http://www.insee.fr>

## Web Tables

**Web Table 1: National demographic indicators and estimates of HbS allele frequency and neonates affected.** The color code indicates high uncertainty (IQR>1.5\*median) in red; medium-high uncertainty (IQR>median) in orange; medium low uncertainty (IQR>0.5\*median) in blue; and low uncertainty (IQR<0.5\*median) in green. An asterisk (\*) indicates Modell and Darlison's 2008 (M&D) estimates falling outside our 50% credible interval (IQR). A double asterisk (\*\*) indicates M&D estimat+C237es falling outside our 90% credible interval. The full legend is shown at the bottom of the Table (p.33).

| Country <sup>1</sup>             | Population <sup>2</sup> | CBR <sup>3</sup> | WHO/HbS region <sup>4</sup> | Surveys | HbS AF (IQR <sup>5</sup> ) | AS neonates/year (IQR5)   | SS neonates/year (IQR5) | M&D <sup>6</sup> |
|----------------------------------|-------------------------|------------------|-----------------------------|---------|----------------------------|---------------------------|-------------------------|------------------|
| Afghanistan                      | 29,117                  | 0.0423           | EMRO/Arab-India             | 1       | 0.000 (0.000-0.001)        | 144 (13-1,078)            | 0 (0-8)                 | 0                |
| Albania                          | 3,158                   | 0.0128           | EURO/Eurasia                | 1       | 0.014 (0.009-0.022)        | 1,391 (863-2,112)         | 30 (14-58)              | 11 *             |
| Algeria                          | 35,423                  | 0.0192           | AFRO/Eurasia                | 18      | 0.007 (0.005-0.010)        | 10,486 (7,351-15,100)     | 191 (115-332)           | 50 **            |
| Angola                           | 18,994                  | 0.0399           | AFRO/Sub-Saharan Africa     | 18      | 0.137 (0.097-0.192)        | 112,443 (90,764-135,659)  | 8,364 (5,880-11,735)    | 9,560            |
| Argentina                        | 40,668                  | 0.0168           | AMRO/Americas               | 0       | 0.000 (0.000-0.001)        | 444 (131-1,273)           | 4 (1-22)                | 0 **             |
| Armenia                          | 3,093                   | 0.0150           | EURO/Eurasia                | 0       | 0.000 (0.000-0.001)        | 0 (0-8)                   | 0 (0-0)                 | 0                |
| Aruba                            | 107                     | 0.0111           | AMRO/Americas               | 1       | 0.016 (0.010-0.024)        | 48 (30-72)                | 1 (0-2)                 | 0 **             |
| Australia                        | 21,510                  | 0.0135           | WPRO/Southeast Asia         | 2       | 0.001 (0.001-0.002)        | 663 (281-1,415)           | 5 (1-18)                | 0 *              |
| Austria                          | 8,403                   | 0.0086           | EURO/Eurasia                | 0       | 0.002 (0.000-0.005)        | 143 (19-691)              | 1 (0-10)                | 0 *              |
| Azerbaijan                       | 8,932                   | 0.0195           | EURO/Eurasia                | 0       | 0.000 (0.000-0.001)        | 4 (0-92)                  | 0 (0-0)                 | 4 *              |
| Bahamas                          | 346                     | 0.0152           | AMRO/Americas               | 1       | 0.024 (0.011-0.054)        | 287 (130-559)             | 8 (3-24)                | 34 *             |
| Bahrain                          | 807                     | 0.0179           | EMRO/Arab-India             | 0       | 0.050 (0.031-0.076)        | 1,548 (1,104-2,016)       | 59 (32-98)              | 81               |
| Bangladesh                       | 164,424                 | 0.0195           | SEAR/Arab-India             | 0       | 0.001 (0.001-0.002)        | 3,459 (847-11,777)        | 16 (2-101)              | 0 **             |
| Barbados                         | 257                     | 0.0109           | AMRO/Americas               | 0       | 0.025 (0.010-0.063)        | 179 (66-350)              | 4 (1-15)                | 4                |
| Belarus                          | 9,579                   | 0.0112           | EURO/Eurasia                | 0       | 0.000 (0.000-0.000)        | 0 (0-7)                   | 0 (0-0)                 | 0                |
| Belgium                          | 10,715                  | 0.0114           | EURO/Eurasia                | 18      | 0.008 (0.006-0.011)        | 2,302 (1,695-3,094)       | 29 (17-49)              | 5 **             |
| Belize                           | 313                     | 0.0240           | AMRO/Americas               | 3       | 0.075 (0.051-0.112)        | 937 (719-1,178)           | 47 (31-70)              | 5 **             |
| Benin                            | 9,219                   | 0.0383           | AFRO/Sub-Saharan Africa     | 9       | 0.159 (0.130-0.191)        | 64,207 (58,876-69,623)    | 4,543 (3,808-5,362)     | 3,561 *          |
| Bhutan                           | 723                     | 0.0196           | SEAR/Southeast Asia         | 0       | 0.001 (0.000-0.002)        | 4 (0-26)                  | 0 (0-0)                 | 0                |
| Bolivia (Plurinational State of) | 9,995                   | 0.0258           | AMRO/Americas               | 0       | 0.000 (0.000-0.000)        | 6 (0-45)                  | 0 (0-0)                 | 0                |
| Bosnia and Herzegovina           | 3,746                   | 0.0082           | EURO/Eurasia                | 0       | 0.003 (0.001-0.007)        | 120 (18-509)              | 1 (0-8)                 | 0 *              |
| Botswana                         | 1,977                   | 0.0229           | AFRO/Sub-Saharan Africa     | 4       | 0.003 (0.002-0.007)        | 300 (120-693)             | 4 (1-15)                | 0 **             |
| Brazil                           | 195,453                 | 0.0150           | AMRO/Americas               | 47      | 0.017 (0.013-0.022)        | 101,138 (81,605-124,941)  | 3,244 (2,312-4,570)     | 764 **           |
| Brunei Darussalam                | 410                     | 0.0182           | WPRO/Southeast Asia         | 0       | 0.000 (0.000-0.000)        | 0 (0-0)                   | 0 (0-0)                 | 0                |
| Bulgaria                         | 7,491                   | 0.0100           | EURO/Eurasia                | 0       | 0.007 (0.003-0.015)        | 1,076 (377-2,510)         | 17 (4-64)               | 0 **             |
| Burkina Faso                     | 16,250                  | 0.0424           | AFRO/Sub-Saharan Africa     | 51      | 0.056 (0.049-0.064)        | 71,083 (65,562-76,864)    | 3,124 (2,681-3,609)     | 1,065 **         |
| Burundi                          | 8,519                   | 0.0333           | AFRO/Sub-Saharan Africa     | 2       | 0.040 (0.029-0.057)        | 24,365 (19,070-30,317)    | 889 (577-1,322)         | 2,449 **         |
| Cambodia                         | 15,056                  | 0.0216           | WPRO/Southeast Asia         | 1       | 0.000 (0.000-0.000)        | 0 (0-0)                   | 0 (0-0)                 | 0                |
| Cameroon                         | 19,957                  | 0.0349           | AFRO/Sub-Saharan Africa     | 34      | 0.120 (0.105-0.138)        | 109,857 (102,502-117,187) | 6,915 (6,069-7,853)     | 5,906 *          |
| Canada                           | 33,871                  | 0.0113           | AMRO/Americas               | 3       | 0.004 (0.002-0.006)        | 3,004 (1,678-5,163)       | 45 (17-104)             | 43               |
| Cape Verde                       | 513                     | 0.0199           | AFRO/Sub-Saharan Africa     | 3       | 0.026 (0.018-0.036)        | 625 (463-800)             | 18 (11-28)              | 6 *              |
| Central African Republic         | 4,506                   | 0.0345           | AFRO/Sub-Saharan Africa     | 2       | 0.077 (0.052-0.113)        | 18,315 (14,060-22,742)    | 976 (638-1,437)         | 677              |
| Chad                             | 11,509                  | 0.0434           | AFRO/Sub-Saharan Africa     | 6       | 0.051 (0.038-0.069)        | 43,553 (35,604-52,360)    | 2,045 (1,459-2,788)     | 908 *            |
| Chile                            | 17,135                  | 0.0140           | AMRO/Americas               | 4       | 0.000 (0.000-0.000)        | 0 (0-0)                   | 0 (0-0)                 | 0                |
| China                            | 1,381,710               | 0.0119           | WPRO/Southeast Asia         | 8       | 0.000 (0.000-0.000)        | 43 (3-384)                | 0 (0-1)                 | 0                |
| Colombia                         | 46,305                  | 0.0189           | AMRO/Americas               | 2       | 0.008 (0.004-0.014)        | 14,464 (7,675-25,504)     | 321 (126-742)           | 537              |
| Comoros                          | 691                     | 0.0357           | AFRO/Sub-Saharan Africa     | 2       | 0.018 (0.011-0.031)        | 1,105 (660-1,736)         | 25 (10-56)              | 0 **             |
| Congo                            | 3,760                   | 0.0346           | AFRO/Sub-Saharan Africa     | 4       | 0.145 (0.112-0.190)        | 22,773 (19,572-25,999)    | 1,560 (1,218-2,008)     | 2,042 *          |

| Country <sup>1</sup>                  | Population <sup>2</sup> | CBR <sup>3</sup> | WHO/Hbs region <sup>4</sup> | Surveys | Hbs AF (IQR <sup>5</sup> ) | AS neonates/year (IQR5)     | SS neonates/year (IQR5) | M&D <sup>6</sup> |
|---------------------------------------|-------------------------|------------------|-----------------------------|---------|----------------------------|-----------------------------|-------------------------|------------------|
| Congo, the Democratic Republic of the | 67,829                  | 0.0421           | AFRO/Sub-Saharan Africa     | 11      | 0.165 (0.142-0.191)        | 489,745 (455,733-524,014)   | 38,217 (32,838-44,870)  | 20,113 **        |
| Costa Rica                            | 4,640                   | 0.0153           | AMRO/Americas               | 1       | 0.016 (0.008-0.033)        | 2,731 (1,211-5,281)         | 60 (18-173)             | 8 *              |
| Côte d'Ivoire                         | 21,571                  | 0.0330           | AFRO/Sub-Saharan Africa     | 7       | 0.062 (0.047-0.082)        | 74,168 (61,560-88,026)      | 3,567 (2,648-4,773)     | 1,564 **         |
| Croatia                               | 4,410                   | 0.0098           | EURO/Eurasia                | 0       | 0.002 (0.001-0.006)        | 137 (22-572)                | 1 (0-10)                | 0 *              |
| Cuba                                  | 11,204                  | 0.0096           | AMRO/Americas               | 1       | 0.030 (0.017-0.054)        | 6,578 (4,194-9,570)         | 240 (111-465)           | 259              |
| Cyprus                                | 846                     | 0.0115           | EURO/Eurasia                | 1       | 0.007 (0.004-0.013)        | 147 (61-308)                | 2 (0-6)                 | 0 *              |
| Czech Republic                        | 10,410                  | 0.0109           | EURO/Eurasia                | 0       | 0.001 (0.000-0.003)        | 59 (4-512)                  | 0 (0-5)                 | 0                |
| Denmark                               | 5,482                   | 0.0113           | EURO/Eurasia                | 0       | 0.000 (0.000-0.002)        | 11 (0-136)                  | 0 (0-1)                 | 2 *              |
| Djibouti                              | 879                     | 0.0284           | EMRO/Sub-Saharan Africa     | 0       | 0.001 (0.000-0.001)        | 3 (0-29)                    | 0 (0-0)                 | 0                |
| Dominican Republic                    | 10,225                  | 0.0209           | AMRO/Americas               | 0       | 0.019 (0.009-0.040)        | 9,461 (4,334-17,804)        | 247 (78-672)            | 722 *            |
| Ecuador                               | 13,775                  | 0.0198           | AMRO/Americas               | 0       | 0.000 (0.000-0.001)        | 45 (3-389)                  | 0 (0-3)                 | 12 *             |
| Egypt                                 | 84,472                  | 0.0223           | EMRO/Eurasia                | 5       | 0.012 (0.006-0.024)        | 47,754 (21,874-92,324)      | 1,196 (395-3,096)       | 19 **            |
| El Salvador                           | 6,201                   | 0.0200           | AMRO/Americas               | 1       | 0.014 (0.008-0.022)        | 4,039 (2,370-6,240)         | 80 (33-168)             | 8 *              |
| Equatorial Guinea                     | 693                     | 0.0359           | AFRO/Sub-Saharan Africa     | 2       | 0.192 (0.144-0.253)        | 5,059 (4,441-5,668)         | 385 (297-493)           | 182 **           |
| Eritrea                               | 5,204                   | 0.0344           | AFRO/Sub-Saharan Africa     | 0       | 0.003 (0.001-0.006)        | 767 (265-2,109)             | 9 (2-34)                | 0 **             |
| Estonia                               | 1,340                   | 0.0121           | EURO/Eurasia                | 0       | 0.000 (0.000-0.000)        | 0 (0-0)                     | 0 (0-0)                 | 0                |
| Ethiopia                              | 84,996                  | 0.0300           | AFRO/Sub-Saharan Africa     | 8       | 0.003 (0.002-0.004)        | 11,197 (6,431-18,883)       | 137 (60-294)            | 1 **             |
| Fiji                                  | 854                     | 0.0206           | WPRO/Southeast Asia         | 0       | 0.000 (0.000-0.000)        | 0 (0-0)                     | 0 (0-0)                 | 0                |
| Finland                               | 5,346                   | 0.0114           | EURO/Eurasia                | 0       | 0.000 (0.000-0.000)        | 0 (0-0)                     | 0 (0-0)                 | 0                |
| France                                | 62,618                  | 0.0124           | EURO/Eurasia                | 7       | 0.013 (0.009-0.018)        | 22,040 (15,621-30,597)      | 520 (290-915)           | 79 **            |
| French Guiana                         | 231                     | 0.0240           | AMRO/Americas               | 6       | 0.015 (0.011-0.021)        | 186 (133-251)               | 5 (3-8)                 | 4                |
| French Polynesia                      | 272                     | 0.0164           | WPRO/Southeast Asia         | 0       | 0.000 (0.000-0.000)        | 0 (0-0)                     | 0 (0-0)                 | 0                |
| Gabon                                 | 1,501                   | 0.0270           | AFRO/Sub-Saharan Africa     | 3       | 0.280 (0.223-0.342)        | 9,342 (8,503-10,189)        | 864 (705-1,059)         | 736              |
| Gambia                                | 1,751                   | 0.0369           | AFRO/Sub-Saharan Africa     | 29      | 0.075 (0.065-0.087)        | 8,657 (7,977-9,355)         | 418 (359-487)           | 305 *            |
| Georgia                               | 4,221                   | 0.0115           | EURO/Eurasia                | 0       | 0.000 (0.000-0.000)        | 0 (0-4)                     | 0 (0-0)                 | 0                |
| Germany                               | 82,014                  | 0.0087           | EURO/Eurasia                | 0       | 0.004 (0.002-0.008)        | 5,940 (2,480-12,680)        | 85 (22-267)             | 23               |
| Ghana                                 | 24,339                  | 0.0303           | AFRO/Sub-Saharan Africa     | 52      | 0.087 (0.079-0.097)        | 102,229 (96,569-107,899)    | 5,474 (4,924-6,051)     | 4,847 *          |
| Greece                                | 11,194                  | 0.0101           | EURO/Eurasia                | 31      | 0.026 (0.020-0.037)        | 6,667 (5,142-8,664)         | 206 (142-322)           | 1 **             |
| Grenada                               | 104                     | 0.0193           | AMRO/Americas               | 0       | 0.037 (0.016-0.079)        | 174 (84-284)                | 6 (2-14)                | 5                |
| Guadeloupe                            | 467                     | 0.0132           | AMRO/Americas               | 1       | 0.031 (0.022-0.044)        | 459 (343-594)               | 14 (8-22)               | 16               |
| Guam                                  | 180                     | 0.0176           | WPRO/Southeast Asia         | 0       | 0.000 (0.000-0.000)        | 0 (0-0)                     | 0 (0-0)                 | 0                |
| Guatemala                             | 14,378                  | 0.0315           | AMRO/Americas               | 0       | 0.011 (0.006-0.020)        | 10,285 (5,208-19,137)       | 252 (105-570)           | 0 **             |
| Guinea                                | 10,324                  | 0.0376           | AFRO/Sub-Saharan Africa     | 1       | 0.168 (0.128-0.213)        | 70,965 (62,302-79,040)      | 5,232 (4,063-6,564)     | 4,325            |
| Guinea-Bissau                         | 1,647                   | 0.0374           | AFRO/Sub-Saharan Africa     | 4       | 0.041 (0.029-0.057)        | 5,011 (3,938-6,175)         | 192 (123-284)           | 0 **             |
| Guyana                                | 761                     | 0.0174           | AMRO/Americas               | 0       | 0.021 (0.009-0.049)        | 622 (251-1,247)             | 17 (5-53)               | 11               |
| Haiti                                 | 10,189                  | 0.0257           | AMRO/Americas               | 8       | 0.051 (0.038-0.069)        | 26,801 (21,627-32,317)      | 1,088 (756-1,531)       | 622 *            |
| Honduras                              | 7,609                   | 0.0258           | AMRO/Americas               | 0       | 0.049 (0.027-0.092)        | 17,783 (11,179-25,925)      | 772 (368-1,473)         | 0 **             |
| Hong Kong                             | 7,288                   | 0.0088           | WPRO/Southeast Asia         | 0       | 0.000 (0.000-0.000)        | 0 (0-0)                     | 0 (0-0)                 | 0                |
| Hungary                               | 9,979                   | 0.0101           | EURO/Eurasia                | 1       | 0.001 (0.000-0.003)        | 59 (4-406)                  | 0 (0-4)                 | 0                |
| Iceland                               | 329                     | 0.0147           | EURO/Eurasia                | 0       | 0.000 (0.000-0.000)        | 0 (0-0)                     | 0 (0-0)                 | 0                |
| India                                 | 1,196,940               | 0.0213           | SEAR/Arab-India             | 113     | 0.023 (0.020-0.027)        | 996,563 (883,210-1,135,290) | 42,016 (35,347-50,919)  | 25,768 **        |
| Indonesia                             | 232,546                 | 0.0174           | SEAR/Southeast Asia         | 14      | 0.000 (0.000-0.000)        | 328 (79-1,206)              | 1 (0-7)                 | 0 *              |
| Iran, Islamic Republic of             | 75,084                  | 0.0162           | EMRO/Arab-India             | 0       | 0.011 (0.007-0.018)        | 25,768 (16,613-39,359)      | 862 (444-1,581)         | 96 **            |

| Country <sup>1</sup>                   | Population <sup>2</sup> | CBR <sup>3</sup> | WHO/Hbs region <sup>4</sup> | Surveys | Hbs AF (IQR <sup>5</sup> ) | AS neonates/year (IQR5) | SS neonates/year (IQR5) | M&D <sup>6</sup> |
|----------------------------------------|-------------------------|------------------|-----------------------------|---------|----------------------------|-------------------------|-------------------------|------------------|
| Iraq                                   | 31,443                  | 0.0341           | EMRO/Arab-India             | 1       | 0.010 (0.005-0.022)        | 23,488 (11,617-47,957)  | 629 (255-1,595)         | 499              |
| Ireland                                | 4,588                   | 0.0156           | EURO/Eurasia                | 0       | 0.001 (0.000-0.003)        | 60 (5-447)              | 0 (0-4)                 | 0                |
| Italy                                  | 60,119                  | 0.0091           | EURO/Eurasia                | 41      | 0.005 (0.003-0.009)        | 5,635 (3,028-10,363)    | 91 (37-236)             | 3 **             |
| Jamaica                                | 2,730                   | 0.0179           | AMRO/Americas               | 4       | 0.037 (0.029-0.048)        | 3,998 (3,282-4,820)     | 137 (99-189)            | 172              |
| Japan                                  | 126,995                 | 0.0085           | WPRO/Southeast Asia         | 1       | 0.000 (0.000-0.000)        | 0 (0-0)                 | 0 (0-0)                 | 0                |
| Jordan                                 | 6,461                   | 0.0237           | EMRO/Eurasia                | 2       | 0.017 (0.012-0.026)        | 6,365 (4,245-9,313)     | 145 (80-260)            | 4 **             |
| Kazakhstan                             | 15,758                  | 0.0206           | EURO/Eurasia                | 0       | 0.000 (0.000-0.000)        | 1 (0-11)                | 0 (0-0)                 | 0                |
| Kenya                                  | 40,835                  | 0.0369           | AFRO/Sub-Saharan Africa     | 51      | 0.038 (0.034-0.043)        | 98,471 (89,175-108,467) | 4,475 (3,879-5,137)     | 7,872 **         |
| Korea, Democratic People's Republic of | 23,963                  | 0.0142           | SEAR/Southeast Asia         | 0       | 0.000 (0.000-0.000)        | 0 (0-0)                 | 0 (0-0)                 | 0                |
| Korea, Republic of                     | 48,517                  | 0.0099           | WPRO/Southeast Asia         | 0       | 0.000 (0.000-0.000)        | 0 (0-0)                 | 0 (0-0)                 | 0                |
| Kuwait                                 | 3,050                   | 0.0174           | EMRO/Arab-India             | 0       | 0.031 (0.014-0.065)        | 3,824 (1,878-6,476)     | 116 (36-293)            | 37               |
| Kyrgyzstan                             | 5,545                   | 0.0240           | EURO/Eurasia                | 0       | 0.000 (0.000-0.000)        | 0 (0-1)                 | 0 (0-0)                 | 0                |
| Lao People's Democratic Republic       | 6,434                   | 0.0218           | WPRO/Southeast Asia         | 0       | 0.000 (0.000-0.000)        | 0 (0-0)                 | 0 (0-0)                 | 0                |
| Latvia                                 | 2,241                   | 0.0110           | EURO/Eurasia                | 0       | 0.000 (0.000-0.000)        | 0 (0-0)                 | 0 (0-0)                 | 0                |
| Lebanon                                | 4,237                   | 0.0149           | EMRO/Eurasia                | 1       | 0.049 (0.033-0.071)        | 6,382 (4,808-8,044)     | 251 (152-382)           | 6 **             |
| Lesotho                                | 2,064                   | 0.0271           | AFRO/Sub-Saharan Africa     | 0       | 0.001 (0.000-0.003)        | 40 (4-244)              | 0 (0-2)                 | 0                |
| Liberia                                | 4,102                   | 0.0376           | AFRO/Sub-Saharan Africa     | 15      | 0.046 (0.038-0.057)        | 13,217 (11,487-14,919)  | 562 (443-714)           | 105 **           |
| Libyan Arab Jamahiriya                 | 6,546                   | 0.0217           | EMRO/Eurasia                | 4       | 0.021 (0.015-0.027)        | 6,020 (4,673-7,559)     | 188 (128-267)           | 34 **            |
| Lithuania                              | 3,256                   | 0.0108           | EURO/Eurasia                | 0       | 0.000 (0.000-0.000)        | 0 (0-1)                 | 0 (0-0)                 | 0                |
| Luxembourg                             | 493                     | 0.0118           | EURO/Eurasia                | 0       | 0.005 (0.003-0.008)        | 48 (20-105)             | 0 (0-1)                 | 0                |
| Madagascar                             | 20,146                  | 0.0346           | AFRO/Sub-Saharan Africa     | 37      | 0.061 (0.053-0.070)        | 69,295 (63,138-75,644)  | 3,379 (2,902-3,915)     | 2,084 **         |
| Malawi                                 | 15,690                  | 0.0445           | AFRO/Sub-Saharan Africa     | 15      | 0.033 (0.023-0.050)        | 47,370 (35,308-61,509)  | 1,688 (1,029-2,765)     | 917 *            |
| Malaysia                               | 27,949                  | 0.0198           | WPRO/Southeast Asia         | 6       | 0.000 (0.000-0.000)        | 1 (0-14)                | 0 (0-0)                 | 0                |
| Maldives                               | 314                     | 0.0165           | SEAR/Eurasia                | 0       | 0.000 (0.000-0.000)        | 0 (0-1)                 | 0 (0-0)                 | 0 *              |
| Mali                                   | 13,362                  | 0.0450           | AFRO/Sub-Saharan Africa     | 8       | 0.057 (0.044-0.072)        | 56,236 (47,355-65,909)  | 2,701 (2,068-3,509)     | 4,421 *          |
| Malta                                  | 410                     | 0.0091           | EURO/Eurasia                | 0       | 0.015 (0.007-0.031)        | 143 (61-284)            | 2 (1-8)                 | 0 **             |
| Martinique                             | 406                     | 0.0116           | AMRO/Americas               | 1       | 0.035 (0.025-0.049)        | 391 (300-496)           | 12 (8-19)               | 9                |
| Mauritania                             | 3,359                   | 0.0327           | AFRO/Sub-Saharan Africa     | 1       | 0.050 (0.030-0.085)        | 9,505 (6,585-12,929)    | 433 (240-748)           | 159 *            |
| Mauritius                              | 1,297                   | 0.0125           | AFRO/Sub-Saharan Africa     | 0       | 0.000 (0.000-0.001)        | 0 (0-19)                | 0 (0-0)                 | 1 *              |
| Mayotte                                | 199                     | 0.0326           | AFRO/Sub-Saharan Africa     | 0       | 0.027 (0.010-0.070)        | 447 (168-863)           | 12 (2-40)               | 0 *              |
| Mexico                                 | 110,567                 | 0.0185           | AMRO/Americas               | 34      | 0.007 (0.005-0.009)        | 31,120 (23,289-41,145)  | 641 (422-975)           | 105 **           |
| Micronesia, Federated States of        | 112                     | 0.0242           | WPRO/Southeast Asia         | 0       | 0.000 (0.000-0.000)        | 0 (0-0)                 | 0 (0-0)                 | 0                |
| Moldova, Republic of                   | 3,538                   | 0.0121           | */Eurasia                   | 0       | 0.000 (0.000-0.001)        | 1 (0-22)                | 0 (0-0)                 | 0                |
| Mongolia                               | 2,706                   | 0.0227           | WPRO/Eurasia                | 0       | 0.000 (0.000-0.000)        | 0 (0-0)                 | 0 (0-0)                 | 0                |
| Montenegro                             | 654                     | 0.0120           | EURO/Eurasia                | 0       | 0.005 (0.002-0.012)        | 72 (16-226)             | 1 (0-4)                 | 0 *              |
| Morocco                                | 31,943                  | 0.0187           | EMRO/Eurasia                | 0       | 0.003 (0.001-0.008)        | 3,202 (824-10,051)      | 40 (6-215)              | 118              |
| Mozambique                             | 23,418                  | 0.0363           | AFRO/Sub-Saharan Africa     | 14      | 0.027 (0.021-0.035)        | 42,588 (34,837-51,562)  | 1,645 (1,193-2,235)     | 170 **           |
| Myanmar                                | 50,503                  | 0.0167           | SEAR/Southeast Asia         | 6       | 0.000 (0.000-0.000)        | 40 (5-222)              | 0 (0-1)                 | 0                |
| Namibia                                | 2,212                   | 0.0252           | AFRO/Sub-Saharan Africa     | 8       | 0.010 (0.006-0.015)        | 1,138 (730-1,806)       | 30 (17-55)              | 10 *             |
| Nepal                                  | 29,950                  | 0.0232           | SEAR/Arab-India             | 1       | 0.002 (0.001-0.004)        | 1,558 (357-4,805)       | 11 (1-67)               | 0 **             |
| Netherlands                            | 16,649                  | 0.0108           | EURO/Eurasia                | 2       | 0.011 (0.008-0.016)        | 4,759 (3,163-6,819)     | 82 (43-149)             | 10 **            |
| Netherlands Antilles                   | 201                     | 0.0131           | AMRO/Americas               | 2       | 0.023 (0.016-0.032)        | 150 (105-203)           | 4 (2-6)                 | 9 *              |
| New Caledonia                          | 254                     | 0.0159           | WPRO/Southeast Asia         | 0       | 0.000 (0.000-0.000)        | 0 (0-0)                 | 0 (0-0)                 | 0                |
| New Zealand                            | 4,303                   | 0.0143           | WPRO/Southeast Asia         | 0       | 0.000 (0.000-0.000)        | 0 (0-0)                 | 0 (0-0)                 | 9 **             |

Web Table 1



| Country <sup>1</sup>             | Population <sup>2</sup> | CBR <sup>3</sup> | WHO/Hbs region <sup>4</sup> | Surveys | Hbs AF (IQR <sup>5</sup> ) | AS neonates/year (IQR5)         | SS neonates/year (IQR5) | M&D <sup>6</sup> |
|----------------------------------|-------------------------|------------------|-----------------------------|---------|----------------------------|---------------------------------|-------------------------|------------------|
| Nicaragua                        | 5,822                   | 0.0228           | AMRO/Americas               | 0       | 0.023 (0.009-0.054)        | 6,514 (2,641-12,964)            | 204 (53-576)            | 4 *              |
| Niger                            | 15,885                  | 0.0477           | AFRO/Sub-Saharan Africa     | 7       | 0.080 (0.058-0.111)        | 90,671 (73,050-109,417)         | 4,965 (3,543-6,894)     | 6,046            |
| Nigeria                          | 158,255                 | 0.0393           | AFRO/Sub-Saharan Africa     | 24      | 0.171 (0.153-0.192)        | 1,136,909 (1,070,320-1,200,907) | 85,186 (76,413-94,945)  | 77,192           |
| Norway                           | 4,856                   | 0.0123           | EURO/Eurasia                | 0       | 0.000 (0.000-0.000)        | 0 (0-13)                        | 0 (0-0)                 | 2 *              |
| Oman                             | 2,962                   | 0.0169           | EMRO/Arab-India             | 2       | 0.001 (0.000-0.001)        | 32 (9-94)                       | 0 (0-1)                 | 222 **           |
| Pakistan                         | 184,754                 | 0.0263           | EMRO/Arab-India             | 1       | 0.002 (0.001-0.005)        | 18,962 (7,260-47,537)           | 228 (53-892)            | 101              |
| Panama                           | 3,508                   | 0.0191           | AMRO/Americas               | 3       | 0.030 (0.019-0.046)        | 4,457 (3,053-6,176)             | 140 (77-244)            | 8 **             |
| Papua New Guinea                 | 6,886                   | 0.0290           | WPRO/Southeast Asia         | 1       | 0.000 (0.000-0.000)        | 0 (0-0)                         | 0 (0-0)                 | 0                |
| Paraguay                         | 6,462                   | 0.0237           | AMRO/Americas               | 0       | 0.003 (0.001-0.006)        | 664 (178-2,093)                 | 7 (1-36)                | 0 **             |
| Peru                             | 29,493                  | 0.0196           | AMRO/Americas               | 10      | 0.000 (0.000-0.000)        | 2 (0-22)                        | 0 (0-0)                 | 25 **            |
| Philippines                      | 93,617                  | 0.0245           | WPRO/Southeast Asia         | 0       | 0.000 (0.000-0.000)        | 0 (0-0)                         | 0 (0-0)                 | 0                |
| Poland                           | 38,049                  | 0.0109           | EURO/Eurasia                | 0       | 0.000 (0.000-0.001)        | 59 (3-590)                      | 0 (0-4)                 | 0                |
| Portugal                         | 10,229                  | 0.0088           | EURO/Eurasia                | 2       | 0.010 (0.007-0.017)        | 2,170 (1,303-3,598)             | 41 (19-90)              | 3 **             |
| Puerto Rico                      | 3,998                   | 0.0129           | AMRO/Americas               | 1       | 0.004 (0.002-0.006)        | 326 (127-710)                   | 2 (1-8)                 | 23 *             |
| Qatar                            | 1,508                   | 0.0116           | EMRO/Arab-India             | 0       | 0.032 (0.015-0.068)        | 1,365 (668-2,262)               | 41 (12-104)             | 7 *              |
| Réunion                          | 837                     | 0.0169           | */                          | 0       | 0.001 (0.000-0.004)        | 6 (0-110)                       | 0 (0-1)                 | 1 *              |
| Romania                          | 21,209                  | 0.0103           | EURO/Eurasia                | 0       | 0.001 (0.000-0.004)        | 320 (45-1,500)                  | 2 (0-21)                | 0 *              |
| Russian Federation               | 140,324                 | 0.0118           | EURO/Eurasia                | 0       | 0.000 (0.000-0.000)        | 14 (1-135)                      | 0 (0-0)                 | 0                |
| Rwanda                           | 10,277                  | 0.0406           | AFRO/Sub-Saharan Africa     | 2       | 0.023 (0.018-0.029)        | 22,857 (18,400-28,098)          | 601 (423-846)           | 125 **           |
| Saint Lucia                      | 174                     | 0.0169           | AMRO/Americas               | 1       | 0.049 (0.031-0.074)        | 311 (223-402)                   | 12 (6-19)               | 7                |
| Saint Vincent and the Grenadines | 109                     | 0.0164           | AMRO/Americas               | 0       | 0.045 (0.022-0.086)        | 176 (99-262)                    | 6 (2-13)                | 2                |
| Samoa                            | 530                     | 0.0237           | WPRO/Southeast Asia         | 0       | 0.000 (0.000-0.000)        | 0 (0-0)                         | 0 (0-0)                 | 0                |
| Saudi Arabia                     | 26,207                  | 0.0214           | EMRO/Arab-India             | 28      | 0.018 (0.016-0.021)        | 19,447 (17,012-22,221)          | 691 (572-842)           | 5,397 **         |
| Sao Tome and Principe            | 165                     | 0.0299           | AFRO/Sub-Saharan Africa     | 0       | 0.094 (0.033-0.236)        | 763 (376-1,132)                 | 41 (12-92)              | 49               |
| Senegal                          | 12,866                  | 0.0359           | AFRO/Sub-Saharan Africa     | 20      | 0.067 (0.054-0.082)        | 53,002 (46,123-60,123)          | 2,535 (1,998-3,163)     | 1,895 *          |
| Serbia                           | 9,842                   | 0.0110           | EURO/Eurasia                | 0       | 0.004 (0.002-0.010)        | 830 (225-2,417)                 | 10 (1-49)               | 0 **             |
| Sierra Leone                     | 5,837                   | 0.0365           | AFRO/Sub-Saharan Africa     | 0       | 0.164 (0.108-0.240)        | 39,530 (31,971-47,084)          | 2,838 (1,906-4,018)     | 3,243            |
| Singapore                        | 4,777                   | 0.0095           | WPRO/Southeast Asia         | 1       | 0.000 (0.000-0.000)        | 0 (0-0)                         | 0 (0-0)                 | 0                |
| Slovakia                         | 5,406                   | 0.0107           | EURO/Eurasia                | 0       | 0.001 (0.000-0.002)        | 12 (0-125)                      | 0 (0-1)                 | 0                |
| Slovenia                         | 2,027                   | 0.0099           | EURO/Eurasia                | 0       | 0.001 (0.000-0.005)        | 22 (2-176)                      | 0 (0-2)                 | 0                |
| Solomon Islands                  | 536                     | 0.0304           | WPRO/Southeast Asia         | 0       | 0.000 (0.000-0.000)        | 0 (0-0)                         | 0 (0-0)                 | 0                |
| Somalia                          | 9,359                   | 0.0430           | EMRO/Sub-Saharan Africa     | 2       | 0.002 (0.001-0.005)        | 1,192 (321-3,777)               | 13 (2-69)               | 0 *              |
| South Africa                     | 50,523                  | 0.0205           | AFRO/Sub-Saharan Africa     | 3       | 0.003 (0.002-0.004)        | 4,946 (2,617-8,872)             | 73 (28-177)             | 0 **             |
| Spain                            | 45,322                  | 0.0106           | EURO/Eurasia                | 4       | 0.007 (0.004-0.012)        | 7,324 (4,253-12,071)            | 149 (64-341)            | 0 **             |
| Sri Lanka                        | 20,410                  | 0.0170           | SEAR/Arab-India             | 28      | 0.001 (0.001-0.002)        | 425 (295-590)                   | 2 (1-3)                 | 0 **             |
| Sudan                            | 43,182                  | 0.0319           | AFRO/Sub-Saharan Africa     | 32      | 0.043 (0.034-0.055)        | 98,244 (84,697-113,554)         | 4,567 (3,527-5,894)     | 483 **           |
| Suriname                         | 524                     | 0.0178           | AMRO/Americas               | 0       | 0.030 (0.013-0.066)        | 653 (300-1,162)                 | 19 (6-53)               | 13               |
| Swaziland                        | 1,195                   | 0.0287           | AFRO/Sub-Saharan Africa     | 0       | 0.006 (0.003-0.010)        | 398 (173-813)                   | 4 (1-13)                | 1                |
| Sweden                           | 9,292                   | 0.0120           | EURO/Eurasia                | 0       | 0.000 (0.000-0.001)        | 2 (0-41)                        | 0 (0-0)                 | 4 *              |
| Switzerland                      | 7,597                   | 0.0100           | EURO/Eurasia                | 0       | 0.004 (0.002-0.011)        | 622 (145-1,907)                 | 6 (1-36)                | 0 *              |
| Syrian Arab Republic             | 22,627                  | 0.0219           | EMRO/Eurasia                | 4       | 0.025 (0.019-0.033)        | 24,448 (19,056-31,267)          | 901 (664-1,261)         | 66 **            |
| Tajikistan                       | 7,078                   | 0.0277           | EURO/Eurasia                | 0       | 0.000 (0.000-0.000)        | 0 (0-6)                         | 0 (0-0)                 | 0                |
| Tanzania, United Republic of     | 45,028                  | 0.0410           | AFRO/Sub-Saharan Africa     | 57      | 0.074 (0.063-0.087)        | 203,747 (185,237-222,866)       | 11,022 (9,327-12,897)   | 8,655 *          |
| Thailand                         | 68,141                  | 0.0115           | SEAR/Southeast Asia         | 0       | 0.000 (0.000-0.000)        | 0 (0-10)                        | 0 (0-0)                 | 0                |

| Country <sup>1</sup>              | Population <sup>2</sup> | CBR <sup>3</sup> | WHO/Hbs region <sup>4</sup> | Surveys | Hbs AF (IQR <sup>5</sup> ) | AS neonates/year (IQR5)   | SS neonates/year (IQR5) | M&D <sup>6</sup> |
|-----------------------------------|-------------------------|------------------|-----------------------------|---------|----------------------------|---------------------------|-------------------------|------------------|
| Timor-Leste                       | 1,167                   | 0.0376           | SEAR/Southeast Asia         | 0       | 0.000 (0.000-0.000)        | 0 (0-0)                   | 0 (0-0)                 | 0                |
| Togo                              | 6,774                   | 0.0310           | AFRO/Sub-Saharan Africa     | 4       | 0.125 (0.105-0.149)        | 34,057 (31,180-36,958)    | 2,175 (1,846-2,540)     | 1,746 *          |
| Trinidad and Tobago               | 1,344                   | 0.0143           | AMRO/Americas               | 1       | 0.038 (0.026-0.056)        | 1,648 (1,207-2,154)       | 56 (33-91)              | 30 *             |
| Tonga                             | 104                     | 0.0257           | WPRO/Southeast Asia         | 0       | 0.000 (0.000-0.000)        | 0 (0-0)                   | 0 (0-0)                 | 0                |
| Tunisia                           | 10,374                  | 0.0165           | EMRO/Eurasia                | 12      | 0.011 (0.009-0.013)        | 4,420 (3,623-5,372)       | 81 (58-113)             | 63               |
| Turkey                            | 75,699                  | 0.0169           | EURO/Eurasia                | 45      | 0.005 (0.004-0.007)        | 12,852 (9,281-20,051)     | 330 (248-526)           | 116 **           |
| Turkmenistan                      | 5,178                   | 0.0212           | EURO/Eurasia                | 0       | 0.000 (0.000-0.001)        | 4 (0-54)                  | 0 (0-0)                 | 0                |
| Uganda                            | 33,798                  | 0.0439           | AFRO/Sub-Saharan Africa     | 11      | 0.082 (0.067-0.100)        | 189,801 (169,157-210,719) | 10,143 (8,223-12,325)   | 8,216 *          |
| Ukraine                           | 45,454                  | 0.0109           | EURO/Eurasia                | 0       | 0.000 (0.000-0.001)        | 33 (2-293)                | 0 (0-2)                 | 0                |
| United Arab Emirates              | 4,647                   | 0.0123           | EMRO/Arab-India             | 2       | 0.004 (0.002-0.007)        | 402 (189-827)             | 4 (1-11)                | 24 *             |
| United Kingdom                    | 61,900                  | 0.0121           | EURO/Eurasia                | 4       | 0.009 (0.007-0.013)        | 15,746 (10,982-21,949)    | 296 (163-517)           | 108 *            |
| United States of America          | 317,736                 | 0.0137           | AMRO/Americas               | 25      | 0.011 (0.009-0.014)        | 100,150 (82,111-122,520)  | 2,843 (2,038-3,968)     | 838 **           |
| Uruguay                           | 3,373                   | 0.0145           | AMRO/Americas               | 0       | 0.001 (0.001-0.003)        | 82 (26-231)               | 1 (0-3)                 | 0 **             |
| Uzbekistan                        | 27,790                  | 0.0208           | EURO/Eurasia                | 0       | 0.000 (0.000-0.000)        | 1 (0-24)                  | 0 (0-0)                 | 0                |
| Vanuatu                           | 246                     | 0.0287           | WPRO/Southeast Asia         | 0       | 0.000 (0.000-0.000)        | 0 (0-0)                   | 0 (0-0)                 | 0                |
| Venezuela, Bolivarian Republic of | 29,044                  | 0.0198           | AMRO/Americas               | 40      | 0.014 (0.012-0.017)        | 19,272 (16,150-22,799)    | 435 (325-591)           | 108 **           |
| Viet Nam                          | 89,009                  | 0.0159           | WPRO/Southeast Asia         | 0       | 0.000 (0.000-0.000)        | 0 (0-4)                   | 0 (0-0)                 | 0                |
| Virgin Islands, U.S.              | 109                     | 0.0121           | */                          | 0       | 0.008 (0.004-0.018)        | 25 (8-59)                 | 0 (0-1)                 | 4 *              |
| Western Sahara                    | 441                     | 0.0213           | */                          | 0       | 0.007 (0.003-0.017)        | 144 (51-330)              | 3 (1-10)                | 2                |
| Yemen                             | 24,325                  | 0.0372           | EMRO/Sub-Saharan Africa     | 1       | 0.004 (0.002-0.006)        | 6,411 (3,355-12,043)      | 80 (29-207)             | 119              |
| Zambia                            | 13,254                  | 0.0465           | AFRO/Sub-Saharan Africa     | 11      | 0.112 (0.095-0.133)        | 88,801 (80,963-96,982)    | 5,652 (4,801-6,632)     | 3,346 **         |
| Zimbabwe                          | 12,645                  | 0.0287           | AFRO/Sub-Saharan Africa     | 7       | 0.021 (0.016-0.028)        | 16,345 (12,706-20,982)    | 483 (326-704)           | 162 **           |

1. Official country names consistent with ISO 3166-1. The following countries are not shown: Åland Islands; Aksai Chin; American Samoa; Andorra; Anguilla; Antarctica; Antigua and Barbuda; Arunachal Pradesh; Ashmore and Cartier Islands; Azores Islands; Baker Island; Bassas da India; Bermuda; Bird Island; Bonaire; Sint Eustatius and Saba; Bouvet Island; British Indian Ocean Territory; British Virgin Islands; Cayman Islands; China/India; Christmas Island; Clipperton Island; Cocos (Keeling) Islands; Cook Islands; Curaçao; Dhekelia and Akrotiri SBA; Dominica; Europa Island; Falkland Islands (Malvinas); Faroe Islands; French Southern Territories; Gaza Strip; Gibraltar; Glorioso Island; Greenland; Guernsey; Hala'ib triangle; Heard Island and McDonald Islands; Holy See (Vatican City State); Howland Island; Ilemi triangle; Isle of Man; Jammu Kashmir; Jarvis Island; Jersey; Johnston Atoll; Juan de Nova Island; Kashmir; Kingman Reef; Kiribati; Kuril islands; Liancourt Rock; Liechtenstein; Madeira Islands; Marshall Islands; Ma'tan al-Sarra; Midway Island; Monaco; Montserrat; Nauru; Navassa Island; Niue; Norfolk Island; Northern Mariana Islands; Palau; Palestinian Territory, Occupied; Palmyra Atoll; Paracel Islands; Pitcairn; Saint Bathélemy; Saint Helena, Ascension and Tristan de Cunha; Saint Kitts and Nevis; Saint Martin (French Part); Saint Pierre and Miquelon; San Marino; Scarborough Reef; Senkaku Islands; Seychelles; Sint Maarten (Dutch part); South Georgia and the South Sandwich Islands; Svalbard and Jan Mayen; Taiwan, Province of China; Tokelau; Trinidad and Tobago; Tromelin Island; Turks and Caicos islands; Tuvalu; United States Minor Outlying Islands; Virgin Islands, British; Wake Island; Wallis and Futuna; West Bank.

2. In thousands. Population data were obtained for the year 2000 from the Global Rural Urban Mapping Project (GRUMP) alpha version and projected to 2010 by applying United Nations national, medium variant, inter-censal growth rates by country [24].

3. CBR = Crude birth rate. Source: Population Division of the Department of Economic and Social Affairs of the United Nations Secretariat, World Population Prospects: The 2010 Revision, <http://esa.un.org/unpd/wpp/index.htm>, Monday, July 25, 2011.

4. World Health Organisation Regional Offices: AFRO, African; SEARO, South East Asian; WPRO, Western Pacific; EMRO, Eastern Mediterranean; AMRO, American; EURO, European.

5. IQR: interquartile range of the posterior predictive distribution for each population at risk estimate. The color code indicates high uncertainty (IQR>1.5\*median) in red; medium-high uncertainty (IQR>median) in orange; medium low uncertainty (IQR>0.5\*median) in blue; and low uncertainty (IQR<0.5\*median) in green.

6. SS neonate estimates from Modell B, Darlison M (2008) Global epidemiology of haemoglobin disorders and derived service indicators. Bull World Health Organ 86: 480-487 [7]. C54

**Web Table 2: National areal prediction summaries and Monte Carlo standard errors (SE) for AS and SS neonate estimates**

| COUNTRY <sup>1</sup>             | HbS heterozygote neonates (AS) |     |         |     |         |     |         |     | HbS homozygote neonates (SS) |    |        |    |       |    |        |    |
|----------------------------------|--------------------------------|-----|---------|-----|---------|-----|---------|-----|------------------------------|----|--------|----|-------|----|--------|----|
|                                  | Mean                           | SE  | Median  | SE  | Q25%    | SE  | Q75%    | SE  | Mean                         | SE | Median | SE | Q25%  | SE | Q75%   | SE |
| Afghanistan                      | 1,889                          | 37  | 144     | 8   | 13      | 1   | 1,078   | 39  | 40                           | 2  | 0      | 0  | 0     | 0  | 8      | 0  |
| Albania                          | 1,619                          | 6   | 1,391   | 8   | 863     | 9   | 2,112   | 12  | 44                           | 0  | 30     | 0  | 14    | 0  | 58     | 1  |
| Algeria                          | 11,939                         | 84  | 10,486  | 88  | 7,351   | 94  | 15,100  | 113 | 267                          | 3  | 191    | 3  | 115   | 2  | 332    | 5  |
| Angola                           | 114,473                        | 451 | 112,443 | 369 | 90,764  | 554 | 135,659 | 578 | 9,761                        | 73 | 8,364  | 51 | 5,880 | 49 | 11,735 | 76 |
| Argentina                        | 1,436                          | 32  | 444     | 20  | 131     | 7   | 1,273   | 38  | 38                           | 2  | 4      | 0  | 1     | 0  | 22     | 1  |
| Armenia                          | 60                             | 4   | 0       | 0   | 0       | 0   | 8       | 1   | 1                            | 0  | 0      | 0  | 0     | 0  | 0      | 0  |
| Aruba                            | 54                             | 0   | 48      | 0   | 30      | 0   | 72      | 0   | 1                            | 0  | 1      | 0  | 0     | 0  | 2      | 0  |
| Australia                        | 1,101                          | 20  | 663     | 14  | 281     | 9   | 1,415   | 27  | 17                           | 0  | 5      | 0  | 1     | 0  |        | 0  |
| Austria                          | 727                            | 11  | 143     | 3   | 19      | 1   | 691     | 18  | 23                           | 1  | 1      | 0  | 0     | 0  | 10     | 0  |
| Azerbaijan                       | 398                            | 13  | 4       | 0   | 0       | 0   | 92      | 8   | 10                           | 1  | 0      | 0  | 0     | 0  | 0      | 0  |
| Bahamas                          | 376                            | 3   | 287     | 4   | 130     | 2   | 559     | 6   | 19                           | 0  | 8      | 0  | 3     | 0  | 24     | 0  |
| Bahrain                          | 2,468                          | 8   | 1,548   | 13  | 1,104   | 16  | 2,016   | 9   | 71                           | 0  | 59     | 1  | 32    | 1  | 98     | 1  |
| Bangladesh                       | 10,409                         | 234 | 3,459   | 113 | 847     | 32  | 11,777  | 323 | 195                          | 8  | 16     | 1  | 2     | 0  | 101    | 4  |
| Barbados                         | 243                            | 2   | 179     | 2   | 66      | 1   | 350     | 5   | 12                           | 0  | 4      | 0  | 1     | 0  | 15     | 0  |
| Belarus                          | 94                             | 5   | 0       | 0   | 0       | 0   | 7       | 0   | 3                            | 0  | 0      | 0  | 0     | 0  | 0      | 0  |
| Belgium                          | 2,499                          | 9   | 2,302   | 8   | 1,695   | 8   | 3,094   | 17  | 38                           | 0  | 29     | 0  | 17    | 0  | 49     | 1  |
| Belize                           | 950                            | 2   | 937     | 3   | 719     | 3   | 1,178   | 3   | 54                           | 0  | 47     | 0  | 31    | 0  | 70     | 0  |
| Benin                            | 61,586                         | 149 | 64,207  | 138 | 58,876  | 181 | 69,623  | 145 | 4,637                        | 17 | 4,543  | 21 | 3,808 | 22 | 5,362  | 19 |
| Bhutan                           | 33                             | 1   | 4       | 0   | 0       | 0   | 26      | 1   | 0                            | 0  | 0      | 0  | 0     | 0  | 0      | 0  |
| Bolivia (Plurinational State of) | 136                            | 5   | 6       | 0   | 0       | 0   | 45      | 2   | 3                            | 0  | 0      | 0  | 0     | 0  | 0      | 0  |
| Bosnia and Herzegovina           | 487                            | 12  | 120     | 5   | 18      | 1   | 509     | 16  | 16                           | 1  | 1      | 0  | 0     | 0  | 8      | 0  |
| Botswana                         | 557                            | 6   | 300     | 5   | 120     | 3   | 693     | 11  | 16                           | 0  | 4      | 0  | 1     | 0  | 15     | 0  |
| Brazil                           | 105,051                        | 455 | 101,138 | 532 | 81,605  | 771 | 124,941 | 488 | 3,697                        | 25 | 3,244  | 28 | 2,312 | 28 | 4,570  | 38 |
| Brunei Darussalam                | 1                              | 0   | 0       | 0   | 0       | 0   | 0       | 0   | 0                            | 0  | 0      | 0  | 0     | 0  | 0      | 0  |
| Bulgaria                         | 1,840                          | 30  | 1,076   | 29  | 377     | 12  | 2,510   | 38  | 61                           | 1  | 17     | 1  | 4     | 0  | 64     | 1  |
| Burkina Faso                     | 72,279                         | 126 | 71,083  | 100 | 65,562  | 96  | 76,864  | 214 | 3,179                        | 9  | 3,124  | 8  | 2,681 | 8  | 3,609  | 15 |
| Burundi                          | 24,599                         | 52  | 24,365  | 56  | 19,070  | 65  | 30,317  | 108 | 1,017                        | 5  | 889    | 2  | 577   | 4  | 1,322  | 8  |
| Cambodia                         | 21                             | 2   | 0       | 0   | 0       | 0   | 0       | 0   | 0                            | 0  | 0      | 0  | 0     | 0  | 0      | 0  |
| Cameroon                         | 107,877                        | 219 | 109,857 | 203 | 102,502 | 238 | 117,187 | 268 | 7,033                        | 24 | 6,915  | 24 | 6,069 | 24 | 7,853  | 37 |
| Canada                           | 3,971                          | 50  | 3,004   | 50  | 1,678   | 32  | 5,163   | 68  | 90                           | 2  | 45     | 1  | 17    | 0  | 104    | 2  |
| Cape Verde                       | 622                            | 2   | 625     | 2   | 463     | 2   | 800     | 3   | 21                           | 0  | 18     | 0  | 11    | 0  | 28     | 0  |
| Central African Republic         | 18,179                         | 67  | 18,315  | 79  | 14,060  | 97  | 22,742  | 59  | 1,126                        | 7  | 976    | 8  | 638   | 7  | 1,437  | 10 |
| Chad                             | 43,331                         | 156 | 43,553  | 189 | 35,604  | 150 | 52,360  | 191 | 2,224                        | 14 | 2,045  | 14 | 1,459 | 9  | 2,788  | 18 |
| Chile                            | 4                              | 0   | 0       | 0   | 0       | 0   | 0       | 0   | 0                            | 0  | 0      | 0  | 0     | 0  | 0      | 0  |
| China                            | 941                            | 48  | 43      | 6   | 3       | 1   | 384     | 43  | 19                           | 2  | 0      | 0  | 0     | 0  | 1      | 0  |
| Colombia                         | 18,814                         | 58  | 14,464  | 175 | 7,675   | 109 | 25,504  | 207 | 591                          | 3  | 321    | 5  | 126   | 3  | 742    | 8  |
| Comoros                          | 1,364                          | 7   | 1,105   | 12  | 660     | 8   | 1,736   | 9   | 44                           | 0  | 25     | 0  | 10    | 0  | 56     | 0  |

| <b>COUNTRY<sup>1</sup></b>       | <b>Mean</b> | <b>SE</b> | <b>Median</b> | <b>SE</b> | <b>Q25%</b> | <b>SE</b> | <b>Q75%</b> | <b>SE</b> | <b>Mean</b> | <b>SE</b> | <b>Median</b> | <b>SE</b> | <b>Q25%</b> | <b>SE</b> | <b>Q75%</b> | <b>SE</b> |
|----------------------------------|-------------|-----------|---------------|-----------|-------------|-----------|-------------|-----------|-------------|-----------|---------------|-----------|-------------|-----------|-------------|-----------|
| Congo                            | 24,627      | 38        | 22,773        | 58        | 19,572      | 60        | 25,999      | 77        | 1,729       | 10        | 1,560         | 6         | 1,218       | 4         | 2,008       | 11        |
| Costa Rica                       | 3,685       | 22        | 2,731         | 27        | 1,211       | 32        | 5,281       | 46        | 141         | 2         | 60            | 1         | 18          | 1         | 173         | 3         |
| Côte d'Ivoire                    | 69,104      | 194       | 74,168        | 243       | 61,560      | 194       | 88,026      | 221       | 3,890       | 20        | 3,567         | 16        | 2,648       | 19        | 4,773       | 27        |
| Croatia                          | 542         | 7         | 137           | 3         | 22          | 1         | 572         | 12        | 18          | 0         | 1             | 0         | 0           | 0         | 10          | 0         |
| Cuba                             | 7,187       | 35        | 6,578         | 29        | 4,194       | 40        | 9,570       | 56        | 345         | 3         | 240           | 2         | 111         | 2         | 465         | 3         |
| Cyprus                           | 296         | 2         | 147           | 3         | 61          | 1         | 308         | 5         | 5           | 0         | 2             | 0         | 0           | 0         | 6           | 0         |
| Czech Republic                   | 748         | 18        | 59            | 3         | 4           | 0         | 512         | 22        | 22          | 1         | 0             | 0         | 0           | 0         | 5           | 0         |
| Democratic Republic of the Congo | 477,016     | 1,714     | 489,745       | 2,002     | 455,733     | 1,504     | 524,014     | 2,012     | 39,965      | 271       | 38,217        | 286       | 32,838      | 235       | 44,870      | 371       |
| Denmark                          | 318         | 8         | 11            | 0         | 0           | 0         | 136         | 6         | 10          | 0         | 0             | 0         | 0           | 0         | 1           | 0         |
| Djibouti                         | 62          | 2         | 3             | 0         | 0           | 0         | 29          | 1         | 1           | 0         | 0             | 0         | 0           | 0         | 0           | 0         |
| Dominican Republic               | 12,092      | 71        | 9,461         | 79        | 4,334       | 47        | 17,804      | 121       | 540         | 7         | 247           | 3         | 78          | 1         | 672         | 10        |
| Ecuador                          | 877         | 28        | 45            | 1         | 3           | 0         | 389         | 16        | 23          | 1         | 0             | 0         | 0           | 0         | 3           | 0         |
| Egypt                            | 64,466      | 478       | 47,754        | 751       | 21,874      | 287       | 92,324      | 703       | 2,570       | 34        | 1,196         | 31        | 395         | 9         | 3,096       | 41        |
| El Salvador                      | 4,668       | 20        | 4,039         | 28        | 2,370       | 17        | 6,240       | 60        | 129         | 1         | 80            | 1         | 33          | 1         | 168         | 2         |
| Equatorial Guinea                | 5,099       | 7         | 5,059         | 13        | 4,441       | 8         | 5,668       | 9         | 409         | 1         | 385           | 2         | 297         | 1         | 493         | 2         |
| Eritrea                          | 1,799       | 34        | 767           | 19        | 265         | 5         | 2,109       | 46        | 42          | 1         | 9             | 0         | 2           | 0         | 34          | 1         |
| Estonia                          | 6           | 1         | 0             | 0         | 0           | 0         | 0           | 0         | 0           | 0         | 0             | 0         | 0           | 0         | 0           | 0         |
| Ethiopia                         | 14,263      | 106       | 11,197        | 113       | 6,431       | 71        | 18,883      | 148       | 259         | 3         | 137           | 2         | 60          | 1         | 294         | 3         |
| Fiji                             | 0           | 0         | 0             | 0         | 0           | 0         | 0           | 0         | 0           | 0         | 0             | 0         | 0           | 0         | 0           | 0         |
| Finland                          | 18          | 2         | 0             | 0         | 0           | 0         | 0           | 0         | 0           | 0         | 0             | 0         | 0           | 0         | 0           | 0         |
| France                           | 24,435      | 104       | 22,040        | 175       | 15,621      | 124       | 30,597      | 208       | 727         | 5         | 520           | 5         | 290         | 3         | 915         | 11        |
| French Guiana                    | 201         | 2         | 186           | 2         | 133         | 2         | 251         | 2         | 6           | 0         | 5             | 0         | 3           | 0         | 8           | 0         |
| French Polynesia                 | 0           | 0         | 0             | 0         | 0           | 0         | 0           | 0         | 0           | 0         | 0             | 0         | 0           | 0         | 0           | 0         |
| Gabon                            | 9,374       | 16        | 9,342         | 16        | 8,503       | 18        | 10,189      | 21        | 905         | 2         | 864           | 2         | 705         | 2         | 1,059       | 4         |
| Georgia                          | 38          | 2         | 0             | 0         | 0           | 0         | 4           | 0         | 1           | 0         | 0             | 0         | 0           | 0         | 0           | 0         |
| Germany                          | 9,880       | 143       | 5,940         | 88        | 2,480       | 58        | 12,680      | 156       | 265         | 6         | 85            | 2         | 22          | 1         | 267         | 5         |
| Ghana                            | 102,545     | 248       | 102,229       | 264       | 96,569      | 261       | 107,899     | 250       | 5,519       | 19        | 5,474         | 21        | 4,924       | 20        | 6,051       | 23        |
| Greece                           | 7,187       | 40        | 6,667         | 51        | 5,142       | 47        | 8,664       | 46        | 259         | 2         | 206           | 2         | 142         | 2         | 322         | 3         |
| Grenada                          | 196         | 1         | 174           | 2         | 84          | 2         | 284         | 2         | 10          | 0         | 6             | 0         | 2           | 0         | 14          | 0         |
| Guadeloupe                       | 469         | 1         | 459           | 2         | 343         | 1         | 594         | 2         | 16          | 0         | 14            | 0         | 8           | 0         | 22          | 0         |
| Guam                             | 0           | 0         | 0             | 0         | 0           | 0         | 0           | 0         | 0           | 0         | 0             | 0         | 0           | 0         | 0           | 0         |
| Guatemala                        | 14,159      | 184       | 10,285        | 172       | 5,208       | 96        | 19,137      | 258       | 470         | 9         | 252           | 6         | 105         | 3         | 570         | 14        |
| Guinea                           | 68,464      | 115       | 70,965        | 124       | 62,302      | 156       | 79,040      | 176       | 5,518       | 19        | 5,232         | 24        | 4,063       | 16        | 6,564       | 29        |
| Guinea-Bissau                    | 4,708       | 19        | 5,011         | 23        | 3,938       | 11        | 6,175       | 32        | 218         | 2         | 192           | 2         | 123         | 1         | 284         | 3         |
| Guyana                           | 837         | 7         | 622           | 7         | 251         | 5         | 1,247       | 18        | 43          | 1         | 17            | 0         | 5           | 0         | 53          | 1         |
| Haiti                            | 26,659      | 38        | 26,801        | 75        | 21,627      | 72        | 32,317      | 57        | 1,197       | 3         | 1,088         | 5         | 756         | 5         | 1,531       | 6         |
| Honduras                         | 19,204      | 100       | 17,783        | 182       | 11,179      | 171       | 25,925      | 104       | 1,083       | 8         | 772           | 11        | 368         | 8         | 1,473       | 10        |
| China, Hong Kong SAR             | 1           | 0         | 0             | 0         | 0           | 0         | 0           | 0         | 0           | 0         | 0             | 0         | 0           | 0         | 0           | 0         |
| Hungary                          | 553         | 16        | 59            | 3         | 4           | 0         | 406         | 9         | 14          | 1         | 0             | 0         | 0           | 0         | 4           | 0         |
| Iceland                          | 1           | 0         | 0             | 0         | 0           | 0         | 0           | 0         | 0           | 0         | 0             | 0         | 0           | 0         | 0           | 0         |

| COUNTRY <sup>1</sup>             | Mean      | SE     | Median  | SE     | Q25%    | SE     | Q75%      | SE     | Mean   | SE  | Median | SE  | Q25%   | SE  | Q75%   | SE  |
|----------------------------------|-----------|--------|---------|--------|---------|--------|-----------|--------|--------|-----|--------|-----|--------|-----|--------|-----|
| India                            | 1,044,394 | 10,547 | 996,563 | 11,472 | 883,210 | 10,488 | 1,135,290 | 10,399 | 44,252 | 671 | 42,016 | 706 | 35,347 | 616 | 50,919 | 770 |
| Indonesia                        | 1,907     | 140    | 328     | 23     | 79      | 8      | 1,206     | 76     | 32     | 6   | 1      | 0   | 0      | 0   | 7      | 1   |
| Iran (Islamic Republic of)       | 30,617    | 411    | 25,768  | 441    | 16,613  | 353    | 39,359    | 433    | 1,252  | 21  | 862    | 18  | 444    | 11  | 1,581  | 19  |
| Iraq                             | 36,723    | 386    | 23,488  | 420    | 11,617  | 176    | 47,957    | 761    | 1,532  | 27  | 629    | 14  | 255    | 6   | 1,595  | 35  |
| Ireland                          | 526       | 13     | 60      | 2      | 5       | 0      | 447       | 13     | 15     | 1   | 0      | 0   | 0      | 0   | 4      | 0   |
| Israel                           | 7,856     | 48     | 7,117   | 58     | 5,302   | 36     | 9,248     | 83     | 252    | 2   | 218    | 3   | 136    | 2   | 324    | 6   |
| Italy                            | 8,051     | 67     | 5,635   | 48     | 3,028   | 45     | 10,363    | 107    | 209    | 4   | 91     | 2   | 37     | 1   | 236    | 4   |
| Jamaica                          | 4,128     | 13     | 3,998   | 16     | 3,282   | 14     | 4,820     | 18     | 152    | 1   | 137    | 1   | 99     | 1   | 189    | 1   |
| Japan                            | 3         | 1      | 0       | 0      | 0       | 0      | 0         | 0      | 0      | 0   | 0      | 0   | 0      | 0   | 0      | 0   |
| Jordan                           | 6,850     | 28     | 6,365   | 37     | 4,245   | 22     | 9,313     | 50     | 202    | 1   | 145    | 1   | 80     | 1   | 260    | 3   |
| Kazakhstan                       | 63        | 2      | 1       | 0      | 0       | 0      | 11        | 1      | 1      | 0   | 0      | 0   | 0      | 0   | 0      | 0   |
| Kenya                            | 98,657    | 956    | 98,471  | 1,055  | 89,175  | 915    | 108,467   | 1,039  | 4,566  | 63  | 4,475  | 63  | 3,879  | 59  | 5,137  | 68  |
| Dem. People's Republic of Korea  | 1         | 0      | 0       | 0      | 0       | 0      | 0         | 0      | 0      | 0   | 0      | 0   | 0      | 0   | 0      | 0   |
| Republic of Korea                | 3         | 2      | 0       | 0      | 0       | 0      | 0         | 0      | 0      | 0   | 0      | 0   | 0      | 0   | 0      | 0   |
| Kuwait                           | 3,982     | 30     | 3,824   | 34     | 1,878   | 39     | 6,476     | 71     | 212    | 3   | 116    | 2   | 36     | 1   | 293    | 7   |
| Kyrgyzstan                       | 52        | 3      | 0       | 0      | 0       | 0      | 1         | 0      | 1      | 0   | 0      | 0   | 0      | 0   | 0      | 0   |
| Lao People's Democratic Republic | 17        | 1      | 0       | 0      | 0       | 0      | 0         | 0      | 0      | 0   | 0      | 0   | 0      | 0   | 0      | 0   |
| Latvia                           | 15        | 2      | 0       | 0      | 0       | 0      | 0         | 0      | 0      | 0   | 0      | 0   | 0      | 0   | 0      | 0   |
| Lebanon                          | 6,502     | 37     | 6,382   | 41     | 4,808   | 37     | 8,044     | 46     | 290    | 3   | 251    | 3   | 152    | 2   | 382    | 3   |
| Lesotho                          | 343       | 8      | 40      | 2      | 4       | 0      | 244       | 13     | 7      | 0   | 0      | 0   | 0      | 0   | 2      | 0   |
| Liberia                          | 12,890    | 54     | 13,217  | 60     | 11,487  | 50     | 14,919    | 59     | 594    | 3   | 562    | 4   | 443    | 3   | 714    | 4   |
| Libyan Arab Jamahiriya           | 6,087     | 29     | 6,020   | 41     | 4,673   | 37     | 7,559     | 36     | 210    | 1   | 188    | 2   | 128    | 1   | 267    | 2   |
| Lithuania                        | 32        | 2      | 0       | 0      | 0       | 0      | 1         | 0      | 1      | 0   | 0      | 0   | 0      | 0   | 0      | 0   |
| Luxembourg                       | 83        | 1      | 48      | 1      | 20      | 0      | 105       | 1      | 1      | 0   | 0      | 0   | 0      | 0   | 1      | 0   |
| China, Macao SAR                 | 0         | 0      | 0       | 0      | 0       | 0      | 0         | 0      | 0      | 0   | 0      | 0   | 0      | 0   | 0      | 0   |
| TFYR Macedonia                   | 736       | 5      | 510     | 6      | 230     | 5      | 1,016     | 14     | 22     | 0   | 9      | 0   | 3      | 0   | 25     | 0   |
| Madagascar                       | 71,583    | 336    | 69,295  | 362    | 63,138  | 282    | 75,644    | 372    | 3,457  | 28  | 3,379  | 28  | 2,902  | 23  | 3,915  | 33  |
| Malawi                           | 47,002    | 194    | 47,370  | 249    | 35,308  | 251    | 61,509    | 264    | 2,133  | 16  | 1,688  | 18  | 1,029  | 14  | 2,765  | 25  |
| Malaysia                         | 56        | 2      | 1       | 0      | 0       | 0      | 14        | 0      | 1      | 0   | 0      | 0   | 0      | 0   | 0      | 0   |
| Maldives                         | 6         | 0      | 0       | 0      | 0       | 0      | 1         | 0      | 0      | 0   | 0      | 0   | 0      | 0   | 0      | 0   |
| Mali                             | 65,849    | 235    | 56,236  | 231    | 47,355  | 268    | 65,909    | 301    | 2,904  | 18  | 2,701  | 20  | 2,068  | 17  | 3,509  | 20  |
| Malta                            | 197       | 2      | 143     | 2      | 61      | 1      | 284       | 4      | 7      | 0   | 2      | 0   | 1      | 0   | 8      | 0   |
| Martinique                       | 403       | 1      | 391     | 1      | 300     | 1      | 496       | 1      | 14     | 0   | 12     | 0   | 8      | 0   | 19     | 0   |
| Mauritania                       | 10,335    | 47     | 9,505   | 72     | 6,585   | 50     | 12,929    | 109    | 573    | 5   | 433    | 5   | 240    | 3   | 748    | 10  |
| Mauritius                        | 105       | 4      | 0       | 0      | 0       | 0      | 19        | 1      | 4      | 0   | 0      | 0   | 0      | 0   | 0      | 0   |
| Mayotte                          | 575       | 3      | 447     | 7      | 168     | 3      | 863       | 8      | 30     | 0   | 12     | 0   | 2      | 0   | 40     | 1   |
| Mexico                           | 34,594    | 214    | 31,120  | 235    | 23,289  | 256    | 41,145    | 242    | 800    | 10  | 641    | 9   | 422    | 7   | 975    | 10  |
| Micronesia (Fed. States of)      | 0         | 0      | 0       | 0      | 0       | 0      | 0         | 0      | 0      | 0   | 0      | 0   | 0      | 0   | 0      | 0   |
| Republic of Moldova              | 124       | 5      | 1       | 0      | 0       | 0      | 22        | 1      | 3      | 0   | 0      | 0   | 0      | 0   | 0      | 0   |
| Mongolia                         | 1         | 0      | 0       | 0      | 0       | 0      | 0         | 0      | 0      | 0   | 0      | 0   | 0      | 0   | 0      | 0   |

| <b>COUNTRY<sup>1</sup></b>       | <b>Mean</b> | <b>SE</b> | <b>Median</b> | <b>SE</b> | <b>Q25%</b> | <b>SE</b> | <b>Q75%</b> | <b>SE</b> | <b>Mean</b> | <b>SE</b> | <b>Median</b> | <b>SE</b> | <b>Q25%</b> | <b>SE</b> | <b>Q75%</b> | <b>SE</b> |
|----------------------------------|-------------|-----------|---------------|-----------|-------------|-----------|-------------|-----------|-------------|-----------|---------------|-----------|-------------|-----------|-------------|-----------|
| Montenegro                       | 170         | 3         | 72            | 1         | 16          | 0         | 226         | 3         | 5           | 0         | 1             | 0         | 0           | 0         | 4           | 0         |
| Morocco                          | 8,269       | 92        | 3,202         | 54        | 824         | 23        | 10,051      | 139       | 278         | 6         | 40            | 1         | 6           | 0         | 215         | 7         |
| Mozambique                       | 43,902      | 241       | 42,588        | 253       | 34,837      | 195       | 51,562      | 312       | 1,818       | 19        | 1,645         | 19        | 1,193       | 13        | 2,235       | 30        |
| Myanmar                          | 305         | 12        | 40            | 2         | 5           | 0         | 222         | 7         | 4           | 0         | 0             | 0         | 0           | 0         | 1           | 0         |
| Namibia                          | 1,442       | 11        | 1,138         | 8         | 730         | 8         | 1,806       | 22        | 46          | 0         | 30            | 1         | 17          | 0         | 55          | 1         |
| Nepal                            | 4,150       | 77        | 1,558         | 33        | 357         | 16        | 4,805       | 80        | 105         | 4         | 11            | 0         | 1           | 0         | 67          | 2         |
| Netherlands                      | 5,281       | 19        | 4,759         | 19        | 3,163       | 22        | 6,819       | 41        | 115         | 1         | 82            | 1         | 43          | 0         | 149         | 2         |
| Netherlands Antilles             | 159         | 0         | 150           | 1         | 105         | 1         | 203         | 1         | 5           | 0         | 4             | 0         | 2           | 0         | 6           | 0         |
| New Caledonia                    | 0           | 0         | 0             | 0         | 0           | 0         | 0           | 0         | 0           | 0         | 0             | 0         | 0           | 0         | 0           | 0         |
| New Zealand                      | 3           | 0         | 0             | 0         | 0           | 0         | 0           | 0         | 0           | 0         | 0             | 0         | 0           | 0         | 0           | 0         |
| Nicaragua                        | 8,715       | 57        | 6,514         | 77        | 2,641       | 40        | 12,964      | 125       | 471         | 7         | 204           | 4         | 53          | 1         | 576         | 10        |
| Niger                            | 89,801      | 231       | 90,671        | 325       | 73,050      | 326       | 109,417     | 469       | 5,503       | 24        | 4,965         | 32        | 3,543       | 25        | 6,894       | 38        |
| Nigeria                          | 1,138,493   | 1,665     | 1,136,909     | 1,640     | 1,070,320   | 2,018     | 1,200,907   | 1,719     | 86,420      | 211       | 85,186        | 247       | 76,413      | 272       | 94,945      | 190       |
| Norway                           | 77          | 4         | 0             | 0         | 0           | 0         | 13          | 1         | 2           | 0         | 0             | 0         | 0           | 0         | 0           | 0         |
| Oman                             | 81          | 3         | 32            | 1         | 9           | 0         | 94          | 2         | 2           | 0         | 0             | 0         | 0           | 0         | 1           | 0         |
| Pakistan                         | 37,554      | 616       | 18,962        | 275       | 7,260       | 92        | 47,537      | 540       | 1,123       | 42        | 228           | 6         | 53          | 2         | 892         | 9         |
| Panama                           | 4,793       | 16        | 4,457         | 23        | 3,053       | 16        | 6,176       | 30        | 184         | 1         | 140           | 1         | 77          | 1         | 244         | 2         |
| Papua New Guinea                 | 4           | 1         | 0             | 0         | 0           | 0         | 0           | 0         | 0           | 0         | 0             | 0         | 0           | 0         | 0           | 0         |
| Paraguay                         | 1,878       | 40        | 664           | 19        | 178         | 4         | 2,093       | 57        | 55          | 2         | 7             | 0         | 1           | 0         | 36          | 1         |
| Peru                             | 80          | 5         | 2             | 0         | 0           | 0         | 22          | 1         | 1           | 0         | 0             | 0         | 0           | 0         | 0           | 0         |
| Philippines                      | 55          | 9         | 0             | 0         | 0           | 0         | 0           | 0         | 1           | 0         | 0             | 0         | 0           | 0         | 0           | 0         |
| Poland                           | 1,110       | 26        | 59            | 3         | 3           | 0         | 590         | 12        | 28          | 1         | 0             | 0         | 0           | 0         | 4           | 0         |
| Portugal                         | 2,921       | 21        | 2,170         | 14        | 1,303       | 13        | 3,598       | 34        | 81          | 1         | 41            | 0         | 19          | 0         | 90          | 1         |
| Puerto Rico                      | 498         | 4         | 326           | 4         | 127         | 1         | 710         | 11        | 8           | 0         | 2             | 0         | 1           | 0         | 8           | 0         |
| Qatar                            | 1,809       | 13        | 1,365         | 28        | 668         | 11        | 2,262       | 26        | 74          | 1         | 41            | 1         | 12          | 0         | 104         | 2         |
| Réunion                          | 193         | 4         | 6             | 0         | 0           | 0         | 110         | 7         | 8           | 1         | 0             | 0         | 0           | 0         | 1           | 0         |
| Romania                          | 1,543       | 33        | 320           | 7         | 45          | 2         | 1,500       | 48        | 44          | 2         | 2             | 0         | 0           | 0         | 21          | 1         |
| Russian Federation               | 381         | 22        | 14            | 1         | 1           | 0         | 135         | 9         | 9           | 1         | 0             | 0         | 0           | 0         | 0           | 0         |
| Rwanda                           | 24,532      | 75        | 22,857        | 103       | 18,400      | 58        | 28,098      | 124       | 680         | 4         | 601           | 6         | 423         | 2         | 846         | 7         |
| Saint Lucia                      | 317         | 1         | 311           | 2         | 223         | 1         | 402         | 1         | 14          | 0         | 12            | 0         | 6           | 0         | 19          | 0         |
| Saint Vincent and the Grenadines | 187         | 1         | 176           | 1         | 99          | 2         | 262         | 1         | 9           | 0         | 6             | 0         | 2           | 0         | 13          | 0         |
| Samoa                            | 0           | 0         | 0             | 0         | 0           | 0         | 0           | 0         | 0           | 0         | 0             | 0         | 0           | 0         | 0           | 0         |
| Sao Tome and Principe            | 783         | 6         | 763           | 11        | 376         | 7         | 1,132       | 7         | 72          | 1         | 41            | 1         | 12          | 0         | 92          | 1         |
| Saudi Arabia                     | 20,767      | 187       | 19,447        | 190       | 17,012      | 181       | 22,221      | 213       | 723         | 9         | 691           | 9         | 572         | 8         | 842         | 10        |
| Senegal                          | 51,572      | 142       | 53,002        | 154       | 46,123      | 146       | 60,123      | 205       | 2,652       | 15        | 2,535         | 16        | 1,998       | 14        | 3,163       | 22        |
| Serbia                           | 1,891       | 28        | 830           | 20        | 225         | 9         | 2,417       | 59        | 59          | 2         | 10            | 0         | 1           | 0         | 49          | 2         |
| Sierra Leone                     | 39,730      | 128       | 39,530        | 197       | 31,971      | 123       | 47,084      | 116       | 3,170       | 21        | 2,838         | 23        | 1,906       | 15        | 4,018       | 24        |
| Singapore                        | 4           | 0         | 0             | 0         | 0           | 0         | 0           | 0         | 0           | 0         | 0             | 0         | 0           | 0         | 0           | 0         |
| Slovakia                         | 221         | 7         | 12            | 1         | 0           | 0         | 125         | 7         | 5           | 0         | 0             | 0         | 0           | 0         | 1           | 0         |
| Slovenia                         | 228         | 5         | 22            | 1         | 2           | 0         | 176         | 5         | 7           | 0         | 0             | 0         | 0           | 0         | 2           | 0         |

| <b>COUNTRY<sup>1</sup></b>         | <b>Mean</b> | <b>SE</b> | <b>Median</b> | <b>SE</b> | <b>Q25%</b> | <b>SE</b> | <b>Q75%</b> | <b>SE</b> | <b>Mean</b> | <b>SE</b> | <b>Median</b> | <b>SE</b> | <b>Q25%</b> | <b>SE</b> | <b>Q75%</b> | <b>SE</b> |
|------------------------------------|-------------|-----------|---------------|-----------|-------------|-----------|-------------|-----------|-------------|-----------|---------------|-----------|-------------|-----------|-------------|-----------|
| Solomon Islands                    | 0           | 0         | 0             | 0         | 0           | 0         | 0           | 0         | 0           | 0         | 0             | 0         | 0           | 0         | 0           | 0         |
| Somalia                            | 3,423       | 51        | 1,192         | 37        | 321         | 12        | 3,777       | 70        | 109         | 2         | 13            | 1         | 2           | 0         | 69          | 2         |
| South Africa                       | 6,803       | 58        | 4,946         | 39        | 2,617       | 43        | 8,872       | 109       | 157         | 3         | 73            | 1         | 28          | 1         | 177         | 3         |
| Spain                              | 9,231       | 45        | 7,324         | 47        | 4,253       | 43        | 12,071      | 103       | 281         | 2         | 149           | 2         | 64          | 1         | 341         | 5         |
| Sri Lanka                          | 479         | 5         | 425           | 6         | 295         | 4         | 590         | 6         | 2           | 0         | 2             | 0         | 1           | 0         | 3           | 0         |
| Sudan                              | 100,612     | 596       | 98,244        | 714       | 84,697      | 688       | 113,554     | 511       | 4,921       | 40        | 4,567         | 52        | 3,527       | 43        | 5,894       | 43        |
| Suriname                           | 783         | 7         | 653           | 10        | 300         | 7         | 1,162       | 13        | 39          | 1         | 19            | 0         | 6           | 0         | 53          | 1         |
| Swaziland                          | 605         | 4         | 398           | 3         | 173         | 2         | 813         | 7         | 12          | 0         | 4             | 0         | 1           | 0         | 13          | 0         |
| Sweden                             | 186         | 10        | 2             | 0         | 0           | 0         | 41          | 2         | 5           | 0         | 0             | 0         | 0           | 0         | 0           | 0         |
| Switzerland                        | 1,510       | 24        | 622           | 20        | 145         | 5         | 1,907       | 51        | 46          | 1         | 6             | 0         | 1           | 0         | 36          | 1         |
| Syrian Arab Republic               | 23,406      | 124       | 24,448        | 123       | 19,056      | 163       | 31,267      | 71        | 1,030       | 10        | 901           | 9         | 664         | 11        | 1,261       | 8         |
| Tajikistan                         | 109         | 8         | 0             | 0         | 0           | 0         | 6           | 0         | 2           | 0         | 0             | 0         | 0           | 0         | 0           | 0         |
| United Republic of Tanzania        | 203,814     | 696       | 203,747       | 685       | 185,237     | 738       | 222,866     | 831       | 11,304      | 71        | 11,022        | 77        | 9,327       | 68        | 12,897      | 82        |
| Thailand                           | 108         | 11        | 0             | 0         | 0           | 0         | 10          | 0         | 2           | 0         | 0             | 0         | 0           | 0         | 0           | 0         |
| Gambia                             | 8,557       | 6         | 8,657         | 12        | 7,977       | 9         | 9,355       | 10        | 427         | 1         | 418           | 1         | 359         | 1         | 487         | 1         |
| Timor-Leste                        | 1           | 0         | 0             | 0         | 0           | 0         | 0           | 0         | 0           | 0         | 0             | 0         | 0           | 0         | 0           | 0         |
| Togo                               | 30,324      | 89        | 34,057        | 93        | 31,180      | 109       | 36,958      | 92        | 2,211       | 10        | 2,175         | 8         | 1,846       | 9         | 2,540       | 12        |
| Tonga                              | 0           | 0         | 0             | 0         | 0           | 0         | 0           | 0         | 0           | 0         | 0             | 0         | 0           | 0         | 0           | 0         |
| Trinidad and Tobago                | 1,713       | 5         | 1,648         | 9         | 1,207       | 6         | 2,154       | 9         | 68          | 0         | 56            | 1         | 33          | 0         | 91          | 1         |
| Tunisia                            | 4,619       | 17        | 4,420         | 20        | 3,623       | 16        | 5,372       | 25        | 90          | 1         | 81            | 1         | 58          | 0         | 113         | 1         |
| Turkey                             | 16,384      | 449       | 12,852        | 363       | 9,281       | 327       | 20,051      | 656       | 519         | 20        | 330           | 17        | 248         | 14        | 526         | 23        |
| Turkmenistan                       | 173         | 7         | 4             | 0         | 0           | 0         | 54          | 3         | 5           | 0         | 0             | 0         | 0           | 0         | 0           | 0         |
| Uganda                             | 187,866     | 618       | 189,801       | 754       | 169,157     | 604       | 210,719     | 728       | 10,454      | 54        | 10,143        | 65        | 8,223       | 51        | 12,325      | 65        |
| Ukraine                            | 600         | 16        | 33            | 1         | 2           | 0         | 293         | 11        | 14          | 1         | 0             | 0         | 0           | 0         | 2           | 0         |
| United Arab Emirates               | 1,043       | 16        | 402           | 10        | 189         | 7         | 827         | 22        | 11          | 0         | 4             | 0         | 1           | 0         | 11          | 0         |
| United Kingdom                     | 17,273      | 41        | 15,746        | 79        | 10,982      | 52        | 21,949      | 114       | 395         | 2         | 296           | 1         | 163         | 2         | 517         | 5         |
| United States of America           | 102,887     | 512       | 100,150       | 600       | 82,111      | 505       | 122,520     | 631       | 3,289       | 25        | 2,843         | 20        | 2,038       | 16        | 3,968       | 34        |
| Uruguay                            | 263         | 3         | 82            | 2         | 26          | 1         | 231         | 6         | 7           | 0         | 1             | 0         | 0           | 0         | 3           | 0         |
| Uzbekistan                         | 255         | 23        | 1             | 0         | 0           | 0         | 24          | 2         | 5           | 1         | 0             | 0         | 0           | 0         | 0           | 0         |
| Vanuatu                            | 0           | 0         | 0             | 0         | 0           | 0         | 0           | 0         | 0           | 0         | 0             | 0         | 0           | 0         | 0           | 0         |
| Venezuela (Bolivarian Republic of) | 19,721      | 107       | 19,272        | 104       | 16,150      | 93        | 22,799      | 156       | 485         | 4         | 435           | 4         | 325         | 2         | 591         | 6         |
| Viet Nam                           | 190         | 19        | 0             | 0         | 0           | 0         | 4           | 0         | 3           | 1         | 0             | 0         | 0           | 0         | 0           | 0         |
| United States Virgin Islands       | 42          | 0         | 25            | 0         | 8           | 0         | 59          | 0         | 1           | 0         | 0             | 0         | 0           | 0         | 1           | 0         |
| Western Sahara                     | 295         | 4         | 144           | 3         | 51          | 1         | 330         | 8         | 10          | 0         | 3             | 0         | 1           | 0         | 10          | 0         |
| Yemen                              | 9,318       | 58        | 6,411         | 77        | 3,355       | 41        | 12,043      | 78        | 194         | 2         | 80            | 1         | 29          | 1         | 207         | 2         |
| Zambia                             | 87,955      | 297       | 88,801        | 344       | 80,963      | 327       | 96,982      | 344       | 5,806       | 29        | 5,652         | 32        | 4,801       | 28        | 6,632       | 34        |
| Zimbabwe                           | 17,166      | 50        | 16,345        | 48        | 12,706      | 57        | 20,982      | 70        | 560         | 4         | 483           | 4         | 326         | 4         | 704         | 4         |

1. Official country names consistent with ISO 3166-1. See Supplementary Table S1 for list of countries not shown.

**Web Table 3: Sub-national areal prediction summaries and Monte Carlo standard errors (SE) for HbAS and HbSS neonate estimates**

| AFRICA        |                    |       |         |            |        | HbAS   |     |        |     |        |     |        |       | HbSS  |     |        |     |       |    |       |     |
|---------------|--------------------|-------|---------|------------|--------|--------|-----|--------|-----|--------|-----|--------|-------|-------|-----|--------|-----|-------|----|-------|-----|
| Country       | Admin1 unit        | GAUL  | Surveys | Population | CBR    | Mean   | SE  | Median | SE  | Q25    | SE  | Q75    | SE    | Mean  | SE  | Median | SE  | Q25   | SE | Q75   | SE  |
| Algeria       | Illizi             | 362   | 7       | 47,940     | 0.0192 | 60     | 0   | 56     | 1   | 43     | 1   | 74     | 1     | 2     | 0   | 2      | 0   | 1     | 0  | 3     | 0   |
| Algeria       | Ouargla            | 373   | 2       | 636,715    | 0.0192 | 416    | 7   | 387    | 3   | 266    | 2   | 530    | 18    | 10    | 0   | 8      | 0   | 4     | 0  | 14    | 1   |
| Angola        | Cuando Cubango     | 402   | 5       | 220,749    | 0.0399 | 249    | 4   | 230    | 2   | 166    | 3   | 313    | 8     | 7     | 0   | 6      | 0   | 3     | 0  | 9     | 0   |
| Angola        | Lunda Norte        | 409   | 7       | 530,093    | 0.0399 | 4,550  | 3   | 4,553  | 10  | 4,250  | 9   | 4,846  | 21    | 388   | 0   | 381    | 1   | 334   | 0  | 434   | 1   |
| Angola        | Lunda Sul          | 410   | 2       | 262,521    | 0.0399 | 1,659  | 10  | 1,656  | 23  | 1,397  | 13  | 1,928  | 17    | 105   | 1   | 98     | 3   | 73    | 1  | 133   | 2   |
| Angola        | Malanje            | 411   | 4       | 1,453,300  | 0.0399 | 14,035 | 8   | 14,033 | 4   | 12,783 | 34  | 15,344 | 95    | 1,471 | 6   | 1,364  | 4   | 1,096 | 10 | 1,722 | 35  |
| Benin         | Atakora            | 610   | 7       | 737,962    | 0.0383 | 2,989  | 16  | 2,969  | 18  | 2,553  | 11  | 3,413  | 17    | 128   | 2   | 122    | 2   | 92    | 0  | 157   | 2   |
| Botswana      | Ngamiland          | 660   | 2       | 139,642    | 0.0229 | 17     | 0   | 10     | 1   | 4      | 0   | 22     | 0     | 0     | 0   | 0      | 0   | 0     | 0  | 0     | 0   |
| Burkina Faso  | Boucle Du Mouhoun  | 40276 | 3       | 1,795,040  | 0.0424 | 5,474  | 42  | 5,355  | 44  | 4,403  | 43  | 6,438  | 18    | 192   | 2   | 177    | 2   | 128   | 2  | 242   | 1   |
| Burkina Faso  | Cascades           | 40277 | 3       | 546,281    | 0.0424 | 2,768  | 11  | 2,757  | 27  | 2,189  | 0   | 3,312  | 4     | 135   | 1   | 124    | 3   | 81    | 1  | 173   | 2   |
| Burkina Faso  | Centre-est         | 40279 | 2       | 1,353,980  | 0.0424 | 6,155  | 9   | 6,121  | 26  | 5,083  | 30  | 7,131  | 3     | 267   | 0   | 251    | 3   | 182   | 0  | 335   | 0   |
| Burkina Faso  | Centre-sud         | 40282 | 8       | 799,269    | 0.0424 | 3,313  | 9   | 3,287  | 21  | 2,896  | 8   | 3,712  | 12    | 128   | 1   | 123    | 2   | 97    | 1  | 153   | 1   |
| Burkina Faso  | Hauts-bassins      | 40284 | 26      | 1,663,650  | 0.0424 | 5,326  | 1   | 5,305  | 5   | 4,822  | 0   | 5,803  | 6     | 167   | 0   | 163    | 0   | 139   | 0  | 190   | 0   |
| Burkina Faso  | Nord               | 40285 | 2       | 1,520,520  | 0.0424 | 7,267  | 67  | 7,237  | 41  | 5,746  | 101 | 8,666  | 76    | 338   | 5   | 311    | 2   | 209   | 4  | 436   | 8   |
| Burkina Faso  | Sahel              | 40287 | 4       | 1,008,040  | 0.0424 | 5,405  | 49  | 5,385  | 44  | 4,594  | 51  | 6,203  | 33    | 284   | 4   | 271    | 1   | 201   | 3  | 353   | 1   |
| Burundi       | Bujumbura-Mairie   | 40543 | 2       | 498,769    | 0.0333 | 1,440  | 5   | 1,395  | 6   | 1,089  | 8   | 1,743  | 12    | 49    | 0   | 43     | 0   | 27    | 0  | 64    | 1   |
| Cote d'Ivoire | Lagunes            | 1044  | 3       | 5,733,330  | 0.0330 | 19,069 | 48  | 18,876 | 95  | 15,669 | 64  | 22,253 | 75    | 756   | 2   | 704    | 5   | 502   | 1  | 946   | 3   |
| Cote d'Ivoire | Zanzan             | 1053  | 4       | 928,182    | 0.0330 | 4,976  | 36  | 4,996  | 34  | 4,416  | 57  | 5,574  | 18    | 314   | 4   | 304    | 6   | 242   | 6  | 375   | 1   |
| Cameroon      | Centre             | 816   | 2       | 3,394,960  | 0.0349 | 23,598 | 12  | 23,650 | 57  | 21,407 | 15  | 25,981 | 44    | 1,731 | 1   | 1,687  | 13  | 1,373 | 8  | 2,060 | 13  |
| Cameroon      | Est                | 817   | 2       | 877,748    | 0.0349 | 4,618  | 41  | 4,604  | 28  | 3,321  | 36  | 5,818  | 105   | 319   | 7   | 272    | 0   | 151   | 0  | 426   | 16  |
| Cameroon      | Extreme-Nord       | 818   | 6       | 3,170,660  | 0.0349 | 11,777 | 142 | 11,722 | 121 | 10,244 | 155 | 13,211 | 142   | 532   | 12  | 512    | 9   | 401   | 8  | 642   | 13  |
| Cameroon      | Littoral           | 819   | 4       | 3,257,190  | 0.0349 | 18,928 | 63  | 19,112 | 121 | 16,178 | 86  | 21,801 | 89    | 1,175 | 7   | 1,122  | 11  | 808   | 4  | 1,482 | 14  |
| Cameroon      | Ouest              | 822   | 2       | 2,365,110  | 0.0349 | 12,515 | 53  | 12,531 | 49  | 10,704 | 68  | 14,365 | 11    | 725   | 2   | 691    | 1   | 510   | 7  | 897   | 2   |
| Cameroon      | Sud                | 823   | 2       | 650,268    | 0.0349 | 4,224  | 1   | 4,219  | 6   | 3,742  | 3   | 4,732  | 12    | 303   | 1   | 290    | 3   | 229   | 2  | 367   | 1   |
| Cameroon      | Sud-Ouest          | 824   | 15      | 1,590,850  | 0.0349 | 10,125 | 35  | 10,159 | 19  | 9,400  | 42  | 10,831 | 25    | 682   | 2   | 676    | 2   | 580   | 6  | 774   | 2   |
| Chad          | Mandoul            | 12925 | 2       | 422,971    | 0.0434 | 1,466  | 1   | 1,453  | 0   | 1,084  | 5   | 1,815  | 4     | 56    | 0   | 49     | 0   | 30    | 0  | 74    | 1   |
| Comoros       | Ngazidja           | 969   | 2       | 360,557    | 0.0357 | 518    | 1   | 472    | 2   | 298    | 3   | 682    | 1     | 12    | 0   | 8      | 0   | 4     | 0  | 15    | 0   |
| Congo         | Pool               | 978   | 3       | 1,664,670  | 0.0346 | 10,867 | 54  | 10,920 | 25  | 9,907  | 69  | 11,894 | 79    | 736   | 4   | 725    | 1   | 598   | 5  | 863   | 12  |
| DRC           | Equateur           | 1068  | 2       | 7,264,900  | 0.0421 | 52,038 | 84  | 51,681 | 524 | 43,694 | 183 | 60,396 | 40    | 4,082 | 16  | 3,730  | 47  | 2,805 | 7  | 5,019 | 34  |
| DRC           | Katanga            | 1071  | 2       | 8,788,270  | 0.0421 | 70,148 | 581 | 69,811 | 596 | 59,978 | 21  | 79,793 | 1,259 | 6,215 | 117 | 5,514  | 144 | 4,175 | 8  | 7,350 | 151 |
| DRC           | Province Orientale | 1075  | 3       | 8,980,980  | 0.0421 | 56,452 | 277 | 56,200 | 157 | 48,710 | 357 | 63,712 | 266   | 3,922 | 27  | 3,711  | 9   | 2,945 | 15 | 4,687 | 43  |



| Country       | Admin1 unit         | GAUL  | Surveys | Population | CBR    | Mean   | SE  | Median | SE  | Q25    | SE  | Q75    | SE  | Mean  | SE | Median | SE | Q25   | SE | Q75   | SE |
|---------------|---------------------|-------|---------|------------|--------|--------|-----|--------|-----|--------|-----|--------|-----|-------|----|--------|----|-------|----|-------|----|
| Egypt         | Al Wadi/al Jadid    | 1169  | 2       | 1,147,300  | 0.0223 | 1,427  | 29  | 1,171  | 12  | 680    | 20  | 1,969  | 22  | 62    | 2  | 40     | 1  | 18    | 1  | 82    | 1  |
| Ethiopia      | Addis Ababa         | 1227  | 2       | 3,923,150  | 0.0300 | 489    | 5   | 282    | 5   | 99     | 1   | 670    | 5   | 3     | 0  | 1      | 0  | 0     | 0  | 3     | 0  |
| Ethiopia      | Amhara              | 1229  | 3       | 21,959,100 | 0.0300 | 3,153  | 5   | 1,917  | 26  | 829    | 6   | 4,052  | 18  | 46    | 0  | 17     | 0  | 5     | 0  | 48    | 2  |
| Gambia        | Kombo Saint Mary    | 1286  | 5       | 492,564    | 0.0369 | 2,456  | 1   | 2,447  | 1   | 2,194  | 10  | 2,710  | 1   | 116   | 0  | 113    | 1  | 91    | 0  | 135   | 1  |
| Gambia        | Q2Ser River         | 1287  | 13      | 87,850     | 0.0369 | 432    | 2   | 433    | 1   | 384    | 1   | 482    | 2   | 21    | 0  | 20     | 0  | 16    | 0  | 25    | 0  |
| Gambia        | North Bank          | 1288  | 4       | 209,418    | 0.0369 | 1,056  | 0   | 1,055  | 1   | 970    | 4   | 1,141  | 2   | 52    | 0  | 50     | 0  | 43    | 0  | 59    | 0  |
| Gambia        | Western             | 1290  | 4       | 464,194    | 0.0369 | 2,185  | 3   | 2,169  | 11  | 1,905  | 13  | 2,459  | 19  | 101   | 0  | 96     | 1  | 77    | 1  | 122   | 2  |
| Ghana         | Ashanti             | 1324  | 18      | 4,872,310  | 0.0303 | 20,087 | 15  | 19,982 | 16  | 18,179 | 49  | 21,934 | 23  | 1,006 | 4  | 969    | 2  | 812   | 8  | 1,165 | 6  |
| Ghana         | Central             | 1326  | 4       | 1,928,780  | 0.0303 | 9,172  | 19  | 9,176  | 17  | 8,122  | 58  | 10,248 | 14  | 531   | 2  | 513    | 1  | 409   | 3  | 637   | 3  |
| Ghana         | Eastern             | 1327  | 4       | 2,693,720  | 0.0303 | 13,261 | 3   | 13,263 | 39  | 11,897 | 3   | 14,664 | 14  | 790   | 0  | 767    | 3  | 624   | 2  | 945   | 1  |
| Ghana         | Greater Accra       | 1328  | 3       | 4,345,450  | 0.0303 | 19,670 | 2   | 19,689 | 35  | 17,716 | 44  | 21,647 | 36  | 1,044 | 0  | 1,021  | 3  | 829   | 1  | 1,231 | 5  |
| Ghana         | Upper East          | 1330  | 16      | 1,069,720  | 0.0303 | 2,779  | 16  | 2,737  | 6   | 2,303  | 7   | 3,229  | 22  | 100   | 1  | 91     | 0  | 67    | 0  | 125   | 1  |
| Ghana         | Volta               | 1332  | 2       | 2,034,190  | 0.0303 | 10,257 | 88  | 10,263 | 103 | 9,279  | 93  | 11,213 | 53  | 647   | 6  | 635    | 9  | 526   | 5  | 755   | 4  |
| Guinea-Bissau | Biombo              | 1386  | 3       | 103,423    | 0.0374 | 187    | 0   | 180    | 1   | 138    | 1   | 228    | 1   | 4     | 0  | 4      | 0  | 2     | 0  | 5     | 0  |
| Kenya         | Coast               | 51326 | 28      | 3,507,020  | 0.0369 | 16,124 | 78  | 16,142 | 83  | 14,764 | 78  | 17,487 | 128 | 840   | 7  | 817    | 11 | 690   | 8  | 969   | 7  |
| Kenya         | Nairobi             | 51328 | 2       | 3,501,660  | 0.0369 | 2,808  | 18  | 2,532  | 11  | 1,610  | 2   | 3,689  | 27  | 38    | 0  | 26     | 0  | 12    | 0  | 51    | 0  |
| Kenya         | Nyanza              | 51330 | 8       | 6,161,510  | 0.0369 | 33,401 | 129 | 33,319 | 68  | 29,437 | 142 | 37,418 | 251 | 1,934 | 12 | 1,865  | 4  | 1,491 | 18 | 2,291 | 24 |
| Kenya         | Rift Valley         | 51331 | 6       | 9,919,120  | 0.0369 | 16,861 | 293 | 15,967 | 266 | 11,894 | 408 | 20,726 | 413 | 533   | 6  | 436    | 10 | 288   | 8  | 683   | 0  |
| Kenya         | Western             | 51332 | 4       | 4,689,570  | 0.0369 | 21,830 | 24  | 21,742 | 40  | 19,229 | 34  | 24,485 | 24  | 1,069 | 3  | 1,030  | 1  | 829   | 3  | 1,278 | 3  |
| Liberia       | Grand Bassa         | 1817  | 3       | 303,787    | 0.0376 | 977    | 1   | 964    | 1   | 797    | 2   | 1,143  | 6   | 35    | 0  | 32     | 0  | 23    | 0  | 44    | 0  |
| Liberia       | Grand Cape Mount    | 1818  | 2       | 319,087    | 0.0376 | 1,772  | 0   | 1,765  | 11  | 1,388  | 15  | 2,150  | 28  | 102   | 1  | 90     | 1  | 57    | 0  | 133   | 2  |
| Liberia       | Lofa                | 1821  | 2       | 159,054    | 0.0376 | 1,019  | 9   | 1,023  | 9   | 885    | 7   | 1,149  | 11  | 67    | 1  | 65     | 0  | 50    | 1  | 82    | 1  |
| Liberia       | Nimba               | 1825  | 2       | 355,946    | 0.0376 | 777    | 6   | 743    | 6   | 560    | 3   | 959    | 6   | 24    | 0  | 20     | 0  | 12    | 0  | 31    | 1  |
| Liberia       | Sinoe               | 1828  | 2       | 424,039    | 0.0376 | 882    | 4   | 832    | 4   | 606    | 5   | 1,105  | 5   | 26    | 0  | 20     | 0  | 12    | 0  | 33    | 0  |
| Libya         | Banghazi            | 1839  | 2       | 888,002    | 0.0217 | 896    | 10  | 823    | 1   | 561    | 12  | 1,152  | 15  | 23    | 0  | 17     | 0  | 9     | 0  | 30    | 1  |
| Madagascar    | Analamanga          | 41752 | 2       | 3,038,530  | 0.0346 | 7,368  | 61  | 7,080  | 47  | 4,889  | 73  | 9,424  | 28  | 244   | 1  | 197    | 1  | 109   | 0  | 325   | 2  |
| Madagascar    | Analanjirifo        | 41753 | 2       | 1,188,460  | 0.0346 | 3,806  | 2   | 3,709  | 22  | 2,747  | 25  | 4,717  | 38  | 167   | 1  | 145    | 2  | 89    | 0  | 224   | 0  |
| Madagascar    | Anosy               | 41755 | 4       | 639,336    | 0.0346 | 2,072  | 3   | 2,034  | 13  | 1,718  | 4   | 2,413  | 8   | 89    | 0  | 83     | 0  | 63    | 0  | 110   | 1  |
| Madagascar    | Atsimo Andrefana    | 41756 | 5       | 1,222,760  | 0.0346 | 2,789  | 13  | 2,670  | 35  | 2,007  | 1   | 3,420  | 7   | 98    | 1  | 84     | 2  | 55    | 1  | 125   | 1  |
| Madagascar    | Atsimo Atsinanana   | 41757 | 3       | 685,524    | 0.0346 | 4,119  | 9   | 4,118  | 15  | 3,695  | 12  | 4,530  | 16  | 265   | 0  | 258    | 1  | 209   | 1  | 313   | 1  |
| Madagascar    | Haute Matsiatra     | 41763 | 2       | 1,242,210  | 0.0346 | 6,579  | 19  | 6,573  | 4   | 5,392  | 5   | 7,753  | 48  | 399   | 0  | 367    | 2  | 255   | 1  | 510   | 1  |
| Madagascar    | Menabe              | 41767 | 4       | 452,022    | 0.0346 | 1,265  | 4   | 1,233  | 6   | 970    | 26  | 1,543  | 6   | 48    | 0  | 43     | 1  | 29    | 1  | 63    | 1  |
| Madagascar    | Vakinankaratra      | 41770 | 2       | 1,812,550  | 0.0346 | 4,265  | 52  | 4,074  | 12  | 2,937  | 23  | 5,370  | 20  | 148   | 3  | 122    | 1  | 68    | 1  | 197   | 1  |
| Madagascar    | Vatovavy Fitovinany | 41771 | 6       | 1,258,170  | 0.0346 | 8,084  | 11  | 8,094  | 15  | 7,380  | 20  | 8,794  | 16  | 555   | 2  | 546    | 1  | 453   | 3  | 639   | 0  |
| Malawi        | Southern Region     | 1890  | 14      | 7,304,820  | 0.0445 | 15,087 | 64  | 14,649 | 34  | 11,882 | 133 | 17,829 | 9   | 383   | 2  | 345    | 4  | 239   | 3  | 484   | 2  |

| Country    | Admin1 unit       | GAUL  | Surveys | Population | CBR    | Mean    | SE  | Median  | SE  | Q25    | SE  | Q75     | SE  | Mean  | SE | Median | SE | Q25   | SE | Q75    | SE  |
|------------|-------------------|-------|---------|------------|--------|---------|-----|---------|-----|--------|-----|---------|-----|-------|----|--------|----|-------|----|--------|-----|
| Mali       | Koulikoro         | 1930  | 4       | 2,972,940  | 0.0450 | 14,006  | 65  | 13,707  | 68  | 11,350 | 44  | 16,591  | 55  | 653   | 11 | 595    | 2  | 433   | 5  | 822    | 11  |
| Mali       | Sikasso           | 1933  | 2       | 2,748,970  | 0.0450 | 13,633  | 34  | 13,503  | 37  | 11,197 | 54  | 15,825  | 38  | 707   | 5  | 656    | 3  | 471   | 1  | 875    | 8   |
| Mozambique | Cabo Delgado      | 2112  | 5       | 1,915,120  | 0.0363 | 4,567   | 44  | 4,326   | 55  | 3,204  | 37  | 5,668   | 76  | 162   | 2  | 128    | 1  | 81    | 1  | 204    | 2   |
| Mozambique | Gaza              | 2113  | 2       | 1,627,090  | 0.0363 | 651     | 15  | 398     | 12  | 171    | 4   | 838     | 16  | 11    | 1  | 4      | 0  | 1     | 0  | 11     | 0   |
| Mozambique | Maputo (city)     | 2117  | 2       | 1,275,780  | 0.0363 | 954     | 10  | 828     | 22  | 540    | 11  | 1,248   | 9   | 12    | 0  | 8      | 0  | 4     | 0  | 16     | 0   |
| Mozambique | Nampula           | 2118  | 2       | 4,290,360  | 0.0363 | 15,143  | 79  | 14,443  | 86  | 10,873 | 79  | 18,853  | 189 | 817   | 12 | 699    | 26 | 442   | 11 | 1,080  | 11  |
| Namibia    | Caprivi           | 2137  | 2       | 100,425    | 0.0252 | 45      | 0   | 27      | 1   | 9      | 0   | 61      | 1   | 1     | 0  | 0      | 0  | 0     | 0  | 1      | 0   |
| Namibia    | Kavango           | 2141  | 6       | 239,368    | 0.0252 | 374     | 0   | 360     | 3   | 276    | 2   | 466     | 1   | 13    | 0  | 11     | 0  | 7     | 0  | 18     | 0   |
| Niger      | Diffa             | 2203  | 3       | 411,442    | 0.0477 | 1,648   | 34  | 1,545   | 41  | 1,056  | 29  | 2,128   | 83  | 73    | 1  | 56     | 2  | 31    | 1  | 97     | 5   |
| Niger      | Tillaberi         | 2208  | 2       | 3,251,270  | 0.0477 | 22,880  | 123 | 23,048  | 68  | 19,469 | 41  | 26,191  | 110 | 1,387 | 8  | 1,321  | 10 | 998   | 6  | 1,702  | 7   |
| Nigeria    | Jigawa            | 2223  | 2       | 5,125,070  | 0.0393 | 20,174  | 61  | 19,359  | 103 | 14,431 | 98  | 25,126  | 98  | 973   | 3  | 809    | 12 | 518   | 6  | 1,264  | 8   |
| Nigeria    | Kaduna            | 2224  | 2       | 7,174,530  | 0.0393 | 53,425  | 146 | 53,496  | 278 | 47,227 | 275 | 59,490  | 135 | 3,893 | 7  | 3,722  | 31 | 2,956 | 12 | 4,624  | 22  |
| Nigeria    | Katsina           | 2226  | 4       | 6,545,700  | 0.0393 | 41,483  | 9   | 41,625  | 71  | 33,571 | 444 | 49,337  | 188 | 2,763 | 11 | 2,541  | 10 | 1,801 | 13 | 3,464  | 19  |
| Nigeria    | Lagos             | 2230  | 2       | 12,494,500 | 0.0393 | 108,491 | 21  | 108,425 | 73  | 99,496 | 131 | 117,602 | 464 | 8,699 | 2  | 8,457  | 10 | 7,047 | 6  | 10,143 | 102 |
| Nigeria    | Ogun              | 2232  | 3       | 4,460,800  | 0.0393 | 40,858  | 39  | 40,870  | 38  | 38,706 | 122 | 42,955  | 88  | 3,539 | 10 | 3,484  | 10 | 3,105 | 6  | 3,929  | 5   |
| Nigeria    | Osun              | 2234  | 3       | 4,466,810  | 0.0393 | 38,165  | 9   | 38,353  | 24  | 35,132 | 84  | 41,354  | 2   | 3,059 | 1  | 3,005  | 12 | 2,507 | 11 | 3,559  | 9   |
| Nigeria    | Oyo               | 2235  | 3       | 7,186,760  | 0.0393 | 63,733  | 233 | 63,863  | 158 | 58,902 | 611 | 68,586  | 14  | 5,443 | 32 | 5,315  | 23 | 4,520 | 81 | 6,272  | 12  |
| Senegal    | Fatick            | 47586 | 4       | 785,769    | 0.0359 | 3,554   | 12  | 3,558   | 24  | 3,051  | 11  | 4,039   | 0   | 170   | 1  | 163    | 2  | 124   | 1  | 207    | 3   |
| Senegal    | Tambacounda       | 2643  | 15      | 668,232    | 0.0359 | 3,798   | 48  | 3,788   | 58  | 3,038  | 47  | 4,486   | 68  | 257   | 5  | 234    | 7  | 164   | 3  | 317    | 9   |
| Sudan      | Central Ekuatoria | 2748  | 5       | 779,795    | 0.0319 | 2,026   | 8   | 2,002   | 14  | 1,651  | 16  | 2,378   | 4   | 72    | 0  | 66     | 0  | 48    | 1  | 91     | 1   |
| Sudan      | Eastern Ekuatoria | 2750  | 4       | 549,064    | 0.0319 | 1,020   | 8   | 956     | 7   | 723    | 3   | 1,249   | 13  | 35    | 0  | 29     | 0  | 20    | 0  | 44     | 0   |
| Sudan      | Khartoum          | 2753  | 6       | 7,313,860  | 0.0319 | 8,999   | 66  | 8,646   | 78  | 6,527  | 73  | 11,121  | 134 | 189   | 3  | 161    | 1  | 98    | 2  | 249    | 5   |
| Sudan      | Sennar            | 2762  | 2       | 1,932,200  | 0.0319 | 7,929   | 39  | 7,789   | 12  | 6,082  | 34  | 9,695   | 6   | 445   | 3  | 389    | 0  | 251   | 0  | 585    | 1   |
| Sudan      | Southern Kordofan | 68785 | 3       | 2,294,240  | 0.0319 | 8,516   | 77  | 8,455   | 121 | 7,065  | 69  | 9,862   | 22  | 458   | 6  | 428    | 8  | 316   | 9  | 568    | 8   |
| Sudan      | Unity             | 2747  | 2       | 684,019    | 0.0319 | 938     | 24  | 846     | 33  | 559    | 14  | 1,216   | 31  | 29    | 1  | 20     | 1  | 10    | 1  | 39     | 2   |
| Sudan      | Upper Nile        | 37021 | 5       | 1,094,950  | 0.0319 | 421     | 16  | 360     | 15  | 212    | 12  | 570     | 26  | 9     | 0  | 5      | 0  | 2     | 0  | 12     | 1   |
| Togo       | Maritime          | 2972  | 3       | 2,878,020  | 0.0310 | 17,738  | 75  | 17,811  | 81  | 16,135 | 73  | 19,428  | 58  | 1,273 | 9  | 1,251  | 13 | 1,024 | 9  | 1,501  | 12  |
| Togo       | Plateaux          | 2973  | 2       | 1,510,980  | 0.0310 | 8,088   | 0   | 8,145   | 52  | 7,027  | 35  | 9,102   | 10  | 535   | 2  | 516    | 3  | 390   | 2  | 649    | 3   |
| Tunisia    | Tunis             | 3015  | 2       | 813,223    | 0.0165 | 322     | 3   | 291     | 5   | 196    | 1   | 413     | 1   | 5     | 0  | 3      | 0  | 2     | 0  | 6      | 0   |
| Uganda     | Kampala           | 42182 | 3       | 1,515,680  | 0.0439 | 10,104  | 9   | 10,128  | 34  | 9,095  | 47  | 11,189  | 27  | 535   | 2  | 523    | 3  | 421   | 0  | 630    | 2   |
| Tanzania   | Kagera            | 48361 | 4       | 2,567,560  | 0.0410 | 13,507  | 5   | 13,477  | 24  | 11,420 | 59  | 15,593  | 38  | 709   | 2  | 670    | 0  | 497   | 1  | 891    | 2   |
| Tanzania   | Kilimanjaro       | 48363 | 10      | 1,892,730  | 0.0410 | 3,100   | 5   | 2,965   | 9   | 2,329  | 3   | 3,778   | 9   | 72    | 0  | 62     | 0  | 42    | 0  | 93     | 0   |
| Tanzania   | Morogoro          | 48368 | 3       | 2,314,940  | 0.0410 | 12,546  | 10  | 12,456  | 57  | 9,853  | 22  | 15,118  | 9   | 714   | 3  | 641    | 0  | 420   | 2  | 915    | 7   |
| Tanzania   | Mwanza            | 48370 | 2       | 3,811,750  | 0.0410 | 25,644  | 176 | 25,676  | 147 | 20,971 | 156 | 30,296  | 299 | 1,703 | 26 | 1,592  | 13 | 1,090 | 13 | 2,166  | 49  |
| Tanzania   | Pwani             | 48373 | 3       | 1,132,920  | 0.0410 | 6,835   | 48  | 6,788   | 58  | 5,905  | 112 | 7,806   | 28  | 400   | 5  | 377    | 7  | 289   | 9  | 488    | 5   |

| Country      | Admin1 unit         | GAUL    | Surveys | Population  | CBR    | Mean        | SE    | Median  | SE    | Q25     | SE    | Q75     | SE    | Mean        | SE  | Median | SE  | Q25   | SE  | Q75    | SE  |   |
|--------------|---------------------|---------|---------|-------------|--------|-------------|-------|---------|-------|---------|-------|---------|-------|-------------|-----|--------|-----|-------|-----|--------|-----|---|
| Tanzania     | Tanga               | 48381   | 15      | 2,148,450   | 0.0410 | 9,090       | 68    | 9,046   | 43    | 7,975   | 4     | 10,165  | 80    | 393         | 5   | 380    | 4   | 302   | 2   | 468    | 8   |   |
| Tanzania     | Unguja North        | 48372   | 2       | 170,008     | 0.0410 | 739         | 3     | 730     | 1     | 620     | 5     | 854     | 2     | 29          | 0   | 28     | 0   | 20    | 0   | 37     | 0   |   |
| Tanzania     | Unguja South        | 48379   | 9       | 156,851     | 0.0410 | 525         | 1     | 522     | 1     | 460     | 0     | 586     | 2     | 16          | 0   | 16     | 0   | 13    | 0   | 20     | 0   |   |
| Tanzania     | Unguja Urban West   | 48382   | 2       | 522,047     | 0.0410 | 1,915       | 1     | 1,884   | 13    | 1,565   | 7     | 2,241   | 9     | 65          | 0   | 60     | 0   | 42    | 0   | 83     | 0   |   |
| Zambia       | Luapula             | 3429    | 2       | 996,460     | 0.0465 | 8,839       | 35    | 8,878   | 9     | 7,723   | 39    | 10,004  | 39    | 673         | 5   | 646    | 2   | 494   | 2   | 821    | 6   |   |
| Zambia       | Northern            | 3432    | 2       | 1,707,160   | 0.0465 | 12,757      | 136   | 12,637  | 60    | 10,301  | 40    | 15,020  | 343   | 900         | 25  | 815    | 11  | 566   | 8   | 1,119  | 42  |   |
| Zambia       | North-Western       | 3431    | 2       | 769,142     | 0.0465 | 6,241       | 27    | 6,277   | 62    | 5,209   | 46    | 7,273   | 30    | 480         | 2   | 438    | 8   | 313   | 7   | 593    | 5   |   |
| Zambia       | Western             | 3434    | 2       | 1,021,440   | 0.0465 | 3,538       | 7     | 3,468   | 31    | 2,625   | 15    | 4,340   | 6     | 161         | 1   | 140    | 1   | 87    | 0   | 212    | 1   |   |
| Zimbabwe     | Mashonaland East    | 69550   | 2       | 1,261,370   | 0.0287 | 2,011       | 25    | 1,918   | 8     | 1,441   | 6     | 2,471   | 62    | 62          | 2   | 53     | 1   | 33    | 1   | 80     | 4   |   |
| <b>ASIA</b>  |                     |         |         |             |        | <b>HbAS</b> |       |         |       |         |       |         |       | <b>HbSS</b> |     |        |     |       |     |        |     |   |
| Country      | Admin1 unit         | GAUL    | Surveys | Population  | CBR    | Mean        | SE    | Median  | SE    | Q25     | SE    | Q75     | SE    | Mean        | SE  | Median | SE  | Q25   | SE  | Q75    | SE  |   |
| China        | Taiwan Sheng        | 925     | 7       | 27,603,700  | 0.0119 | 0           | 0     | 0       | 0     | 0       | 0     | 0       | 0     | 0           | 0   | 0      | 0   | 0     | 0   | 0      | 0   | 0 |
| India        | Andaman and Nicobar | 1484    | 8       | 404,656     | 0.0213 | 2           | 0     | 0       | 0     | 0       | 0     | 0       | 0     | 0           | 0   | 0      | 0   | 0     | 0   | 0      | 0   | 0 |
| India        | Andhra Pradesh      | 1485    | 21      | 90,604,700  | 0.0213 | 107,874     | 484   | 104,699 | 594   | 85,674  | 170   | 127,179 | 1,030 | 4,237       | 5   | 3,783  | 8   | 2,767 | 20  | 5,263  | 13  |   |
| India        | Chhattisgarh        | 70075   | 8       | 24,165,500  | 0.0213 | 39,033      | 974   | 38,019  | 858   | 31,681  | 1,041 | 45,487  | 1,292 | 1,667       | 68  | 1,538  | 60  | 1,208 | 59  | 1,994  | 93  |   |
| India        | Gujarat             | 1491    | 9       | 60,421,700  | 0.0213 | 88,628      | 1,232 | 84,780  | 1,478 | 69,441  | 1,339 | 104,503 | 1,357 | 3,530       | 79  | 3,234  | 125 | 2,451 | 85  | 4,319  | 73  |   |
| India        | Jharkhand           | 70078   | 3       | 32,676,100  | 0.0213 | 8,250       | 104   | 5,867   | 78    | 3,463   | 251   | 10,581  | 23    | 146         | 7   | 68     | 0   | 30    | 3   | 170    | 7   |   |
| India        | Karnataka           | 1494    | 6       | 62,125,300  | 0.0213 | 155,842     | 3,975 | 150,473 | 2,359 | 120,782 | 2,940 | 184,620 | 5,729 | 10,388      | 374 | 9,394  | 277 | 6,936 | 160 | 12,890 | 551 |   |
| India        | Kerala              | 1495    | 8       | 37,121,100  | 0.0213 | 28,072      | 1,380 | 26,739  | 1,168 | 21,265  | 976   | 33,472  | 1,796 | 1,065       | 72  | 964    | 60  | 695   | 37  | 1,335  | 112 |   |
| India        | Madhya Pradesh      | 70079   | 5       | 70,788,900  | 0.0213 | 91,872      | 868   | 86,888  | 355   | 66,685  | 195   | 111,513 | 1,021 | 3,871       | 90  | 3,346  | 55  | 2,273 | 19  | 4,854  | 99  |   |
| India        | Maharashtra         | 1498    | 14      | 115,681,000 | 0.0213 | 132,957     | 1,982 | 127,739 | 932   | 103,303 | 1,164 | 157,602 | 3,352 | 5,387       | 96  | 4,678  | 52  | 3,511 | 31  | 6,644  | 182 |   |
| India        | Orissa              | 1504    | 10      | 43,291,600  | 0.0213 | 55,843      | 470   | 54,318  | 958   | 46,360  | 1,248 | 62,997  | 256   | 2,323       | 24  | 2,205  | 43  | 1,794 | 22  | 2,736  | 36  |   |
| India        | Rajasthan           | 1506    | 2       | 66,017,300  | 0.0213 | 37,251      | 1,550 | 29,852  | 689   | 17,925  | 1,129 | 49,064  | 2,014 | 1,114       | 83  | 689    | 38  | 356   | 31  | 1,362  | 87  |   |
| India        | Tamil Nadu          | 1508    | 5       | 75,463,700  | 0.0213 | 120,340     | 739   | 113,504 | 1,512 | 81,234  | 1,251 | 152,672 | 838   | 6,326       | 86  | 5,221  | 24  | 3,271 | 123 | 8,169  | 200 |   |
| India        | West Bengal         | 1511    | 4       | 94,360,600  | 0.0213 | 9,178       | 70    | 6,069   | 244   | 3,097   | 87    | 12,053  | 270   | 105         | 1   | 44     | 2   | 15    | 1   | 118    | 0   |   |
| Indonesia    | NUSA TENGGARA TIMUR | 1013683 | 7       | 3,897,850   | 0.0174 | 2           | 0     | 0       | 0     | 0       | 0     | 0       | 0     | 0           | 0   | 0      | 0   | 0     | 0   | 0      | 0   |   |
| Indonesia    | SUMATERA UTARA      | 1013681 | 2       | 13,056,600  | 0.0174 | 26          | 3     | 0       | 0     | 0       | 0     | 2       | 0     | 0           | 0   | 0      | 0   | 0     | 0   | 0      | 0   |   |
| Malaysia     | Perak               | 1898    | 4       | 2,413,540   | 0.0198 | 4           | 0     | 0       | 0     | 0       | 0     | 0       | 0     | 0           | 0   | 0      | 0   | 0     | 0   | 0      | 0   |   |
| Myanmar      | Yangon Division     | 1012330 | 2       | 6,925,730   | 0.0167 | 10          | 0     | 0       | 0     | 0       | 0     | 0       | 0     | 0           | 0   | 0      | 0   | 0     | 0   | 0      | 0   |   |
| Saudi Arabia | Asir                | 2622    | 3       | 1,965,050   | 0.0214 | 1,721       | 70    | 1,606   | 75    | 1,198   | 53    | 2,131   | 89    | 53          | 3   | 44     | 4   | 27    | 2   | 69     | 5   |   |
| Saudi Arabia | Eastern Province    | 2624    | 12      | 3,702,700   | 0.0214 | 8,546       | 16    | 8,514   | 15    | 7,594   | 41    | 9,451   | 12    | 417         | 5   | 405    | 5   | 335   | 5   | 481    | 5   |   |
| Saudi Arabia | Madinah             | 2628    | 2       | 1,746,360   | 0.0214 | 1,075       | 7     | 737     | 12    | 386     | 11    | 1,437   | 56    | 31          | 1   | 13     | 0   | 6     | 0   | 34     | 2   |   |
| Saudi Arabia | Makkah              | 2629    | 5       | 7,054,850   | 0.0214 | 1,559       | 25    | 1,275   | 39    | 761     | 13    | 2,000   | 61    | 31          | 1   | 20     | 1   | 10    | 0   | 42     | 3   |   |
| Saudi Arabia | Riyad               | 2633    | 2       | 6,111,720   | 0.0214 | 4,032       | 6     | 3,672   | 11    | 2,526   | 43    | 5,166   | 24    | 103         | 1   | 82     | 1   | 46    | 1   | 136    | 1   |   |

| Country   | Admin1 unit   | GAUL | Surveys | Population | CBR    | Mean  | SE | Median | SE | Q25   | SE | Q75   | SE | Mean | SE | Median | SE | Q25 | SE | Q75 | SE |   |
|-----------|---------------|------|---------|------------|--------|-------|----|--------|----|-------|----|-------|----|------|----|--------|----|-----|----|-----|----|---|
| Sri Lanka | Central       | 2736 | 3       | 2,618,530  | 0.0170 | 41    | 0  | 28     | 0  | 13    | 0  | 53    | 0  | 0    | 0  | 0      | 0  | 0   | 0  | 0   | 0  | 0 |
| Sri Lanka | Eastern       | 2737 | 3       | 1,531,360  | 0.0170 | 81    | 0  | 61     | 1  | 34    | 0  | 106   | 1  | 1    | 0  | 0      | 0  | 0   | 0  | 0   | 1  | 0 |
| Sri Lanka | North Central | 2738 | 2       | 1,224,280  | 0.0170 | 40    | 1  | 29     | 0  | 16    | 0  | 51    | 0  | 0    | 0  | 0      | 0  | 0   | 0  | 0   | 0  | 0 |
| Sri Lanka | North Western | 2739 | 4       | 2,375,170  | 0.0170 | 37    | 0  | 23     | 0  | 10    | 0  | 47    | 1  | 0    | 0  | 0      | 0  | 0   | 0  | 0   | 0  | 0 |
| Sri Lanka | Northern      | 2740 | 5       | 1,180,100  | 0.0170 | 97    | 0  | 74     | 1  | 43    | 0  | 124   | 0  | 1    | 0  | 0      | 0  | 0   | 0  | 0   | 1  | 0 |
| Sri Lanka | Sabaragamuwa  | 2741 | 2       | 2,005,920  | 0.0170 | 36    | 1  | 26     | 0  | 13    | 1  | 49    | 1  | 0    | 0  | 0      | 0  | 0   | 0  | 0   | 0  | 0 |
| Sri Lanka | Southern      | 2742 | 3       | 2,514,960  | 0.0170 | 53    | 1  | 33     | 1  | 14    | 0  | 73    | 2  | 0    | 0  | 0      | 0  | 0   | 0  | 0   | 0  | 0 |
| Sri Lanka | Uva           | 2743 | 2       | 1,259,060  | 0.0170 | 30    | 1  | 21     | 0  | 10    | 0  | 40    | 1  | 0    | 0  | 0      | 0  | 0   | 0  | 0   | 0  | 0 |
| Sri Lanka | Western       | 2744 | 4       | 5,700,630  | 0.0170 | 59    | 0  | 30     | 0  | 10    | 0  | 76    | 1  | 0    | 0  | 0      | 0  | 0   | 0  | 0   | 0  | 0 |
| Syria     | Damascus      | 2837 | 3       | 1,726,370  | 0.0219 | 5,394 | 36 | 5,348  | 68 | 4,693 | 47 | 6,105 | 8  | 284  | 3  | 269    | 5  | 212 | 4  | 347 | 3  | 3 |
| Turkey    | Adana         | 3017 | 4       | 1,943,940  | 0.0169 | 1,898 | 1  | 1,861  | 7  | 1,536 | 2  | 2,229 | 9  | 65   | 0  | 61     | 1  | 44  | 0  | 81  | 1  | 1 |
| Turkey    | Hatay         | 3052 | 14      | 1,350,070  | 0.0169 | 1,552 | 41 | 1,546  | 39 | 1,376 | 42 | 1,724 | 43 | 50   | 2  | 49     | 2  | 40  | 2  | 59  | 3  | 3 |
| Turkey    | Icel          | 3053 | 16      | 2,016,630  | 0.0169 | 2,104 | 55 | 2,081  | 70 | 1,873 | 55 | 2,317 | 64 | 78   | 3  | 76     | 3  | 62  | 3  | 92  | 3  | 3 |
| Turkey    | K.maras       | 3058 | 9       | 1,113,540  | 0.0169 | 16    | 0  | 9      | 0  | 3     | 0  | 21    | 0  | 0    | 0  | 0      | 0  | 0   | 0  | 0   | 0  | 0 |
| UAE       | Abu Dhabi     | 3173 | 2       | 1,737,000  | 0.0123 | 301   | 5  | 221    | 9  | 111   | 4  | 402   | 17 | 5    | 0  | 2      | 0  | 1   | 0  | 6   | 0  | 0 |

| NORTH AMERICA |                |      |         |            |        | HbAS   |     |        |     |       |     |        |     | HbSS |    |        |    |     |    |     |    |    |
|---------------|----------------|------|---------|------------|--------|--------|-----|--------|-----|-------|-----|--------|-----|------|----|--------|----|-----|----|-----|----|----|
| Country       | Admin1 unit    | GAUL | Surveys | Population | CBR    | Mean   | SE  | Median | SE  | Q25   | SE  | Q75    | SE  | Mean | SE | Median | SE | Q25 | SE | Q75 | SE |    |
| Canada        | Saskatchewan   | 836  | 2       | 1,102,480  | 0.0113 | 17     | 0   | 4      | 0   | 1     | 0   | 14     | 0   | 0    | 0  | 0      | 0  | 0   | 0  | 0   | 0  | 0  |
| USA           | Alaska         | 3215 | 2       | 682,465    | 0.0137 | 1      | 0   | 0      | 0   | 0     | 0   | 0      | 0   | 0    | 0  | 0      | 0  | 0   | 0  | 0   | 0  | 0  |
| USA           | California     | 3218 | 5       | 39,245,000 | 0.0137 | 11,911 | 236 | 11,030 | 264 | 7,832 | 353 | 15,032 | 204 | 260  | 7  | 199    | 8  | 114 | 6  | 336 | 8  | 8  |
| USA           | Florida        | 3223 | 3       | 18,312,800 | 0.0137 | 9,196  | 183 | 7,639  | 255 | 5,045 | 114 | 11,799 | 281 | 290  | 4  | 181    | 8  | 95  | 3  | 346 | 12 | 12 |
| USA           | New York       | 3246 | 7       | 21,636,900 | 0.0137 | 11,519 | 95  | 11,029 | 115 | 8,774 | 12  | 13,627 | 236 | 259  | 3  | 224    | 1  | 153 | 2  | 323 | 10 | 10 |
| USA           | North Carolina | 3247 | 3       | 8,821,450  | 0.0137 | 3,088  | 111 | 2,211  | 64  | 1,137 | 78  | 4,272  | 91  | 94   | 5  | 40     | 3  | 14  | 2  | 114 | 3  | 3  |

| SOUTH AMERICA |                   |      |         |            |        | HbAS   |     |        |     |        |     |        |     | HbSS |    |        |    |     |    |     |    |    |
|---------------|-------------------|------|---------|------------|--------|--------|-----|--------|-----|--------|-----|--------|-----|------|----|--------|----|-----|----|-----|----|----|
| Country       | Admin1 unit       | GAUL | Surveys | Population | CBR    | Mean   | SE  | Median | SE  | Q25    | SE  | Q75    | SE  | Mean | SE | Median | SE | Q25 | SE | Q75 | SE |    |
| Belize        | Stann Creek       | 607  | 3       | 32,388     | 0.0240 | 139    | 0   | 140    | 0   | 122    | 1   | 157    | 0   | 9    | 0  | 9      | 0  | 7   | 0  | 11  | 0  | 0  |
| Brazil        | Amazonas          | 668  | 5       | 2,642,080  | 0.0150 | 264    | 1   | 143    | 6   | 61     | 6   | 326    | 13  | 5    | 0  | 2      | 0  | 0   | 0  | 5   | 0  | 0  |
| Brazil        | Bahia             | 669  | 9       | 13,676,400 | 0.0150 | 14,817 | 60  | 14,078 | 12  | 11,465 | 2   | 17,488 | 300 | 640  | 4  | 558    | 1  | 393 | 3  | 780 | 12 | 12 |
| Brazil        | Rio Grande Do Sul | 685  | 8       | 12,029,500 | 0.0150 | 3,721  | 25  | 3,493  | 7   | 2,643  | 41  | 4,484  | 17  | 65   | 1  | 56     | 1  | 35  | 0  | 82  | 1  | 1  |
| Brazil        | Rondonia          | 686  | 2       | 1,540,980  | 0.0150 | 75     | 4   | 12     | 1   | 1      | 0   | 62     | 1   | 2    | 0  | 0      | 0  | 0   | 0  | 0   | 0  | 0  |
| Brazil        | Sao Paulo         | 689  | 15      | 45,722,000 | 0.0150 | 26,450 | 512 | 23,546 | 718 | 15,886 | 433 | 33,552 | 590 | 700  | 24 | 505    | 26 | 290 | 18 | 867 | 36 | 36 |
| Chile         | Antofagasta (ii)  | 883  | 3       | 601,091    | 0.0140 | 0      | 0   | 0      | 0   | 0      | 0   | 0      | 0   | 0    | 0  | 0      | 0  | 0   | 0  | 0   | 0  | 0  |
| French Guiana | Cayenne           | 1271 | 3       | 167,704    | 0.0240 | 77     | 2   | 57     | 0   | 28     | 1   | 104    | 2   | 2    | 0  | 1      | 0  | 0   | 0  | 2   | 0  | 0  |

| Country       | Admin1 unit             | GAUL    | Surveys | Population | CBR    | Mean  | SE | Median | SE | Q25   | SE | Q75   | SE | Mean | SE | Median | SE | Q25 | SE | Q75 | SE |
|---------------|-------------------------|---------|---------|------------|--------|-------|----|--------|----|-------|----|-------|----|------|----|--------|----|-----|----|-----|----|
| French Guiana | Saint-laurent-du-maroni | 1272    | 3       | 63,209     | 0.0240 | 122   | 0  | 115    | 1  | 84    | 1  | 156   | 1  | 5    | 0  | 4      | 0  | 2   | 0  | 6   | 0  |
| Haiti         | Grand'Anse              | 72911   | 5       | 390,714    | 0.0257 | 1,144 | 1  | 1,124  | 8  | 827   | 3  | 1,431 | 5  | 54   | 0  | 45     | 1  | 27  | 0  | 71  | 1  |
| Haiti         | Nord-Ouest              | 1414    | 2       | 491,890    | 0.0257 | 1,205 | 1  | 1,168  | 4  | 913   | 6  | 1,479 | 5  | 48   | 0  | 41     | 0  | 26  | 0  | 62  | 0  |
| Jamaica       | Saint Andrew & Kingston | 1640    | 3       | 688,272    | 0.0179 | 1,241 | 7  | 1,227  | 8  | 1,025 | 15 | 1,442 | 9  | 47   | 0  | 44     | 0  | 32  | 1  | 59  | 1  |
| Mexico        | Chiapas                 | 1006348 | 2       | 4,239,470  | 0.0185 | 1,165 | 18 | 501    | 7  | 184   | 1  | 1,335 | 20 | 29   | 1  | 5      | 1  | 1   | 0  | 22  | 1  |
| Mexico        | Tabasco                 | 1006373 | 2       | 2,125,840  | 0.0185 | 1,060 | 17 | 567    | 3  | 173   | 4  | 1,443 | 41 | 28   | 2  | 5      | 0  | 1   | 0  | 24  | 0  |
| Nths Antilles | Not available           | 2157    | 2       | 200,555    | 0.0131 | 159   | 0  | 152    | 1  | 103   | 0  | 204   | 1  | 5    | 0  | 4      | 0  | 2   | 0  | 6   | 0  |
| Peru          | LORETO                  | 1012328 | 3       | 1,032,140  | 0.0196 | 10    | 1  | 0      | 0  | 0     | 0  | 3     | 0  | 0    | 0  | 0      | 0  | 0   | 0  | 0   | 0  |
| Peru          | PASCO                   | 1012373 | 2       | 280,795    | 0.0196 | 0     | 0  | 0      | 0  | 0     | 0  | 0     | 0  | 0    | 0  | 0      | 0  | 0   | 0  | 0   | 0  |
| Peru          | UCAYALI                 | 1012374 | 2       | 461,896    | 0.0196 | 1     | 0  | 0      | 0  | 0     | 0  | 0     | 0  | 0    | 0  | 0      | 0  | 0   | 0  | 0   | 0  |
| Venezuela     | Amazonas                | 3302    | 14      | 59,011     | 0.0198 | 19    | 0  | 15     | 0  | 8     | 0  | 25    | 0  | 0    | 0  | 0      | 0  | 0   | 0  | 0   | 0  |
| Venezuela     | Anzoategui              | 3303    | 2       | 1,432,080  | 0.0198 | 888   | 1  | 718    | 3  | 388   | 8  | 1,196 | 9  | 22   | 0  | 12     | 0  | 5   | 0  | 27  | 0  |
| Venezuela     | Aragua                  | 3305    | 3       | 1,716,840  | 0.0198 | 1,634 | 2  | 1,551  | 6  | 1,160 | 12 | 2,036 | 12 | 39   | 0  | 32     | 0  | 20  | 1  | 51  | 0  |
| Venezuela     | Bolivar                 | 3307    | 3       | 1,543,730  | 0.0198 | 719   | 6  | 624    | 9  | 397   | 9  | 927   | 11 | 14   | 0  | 9      | 0  | 5   | 0  | 17  | 0  |
| Venezuela     | Falcon                  | 3313    | 2       | 755,559    | 0.0198 | 911   | 0  | 865    | 8  | 611   | 9  | 1,160 | 7  | 30   | 0  | 24     | 0  | 14  | 0  | 39  | 0  |
| Venezuela     | Miranda                 | 3317    | 2       | 3,079,300  | 0.0198 | 2,342 | 3  | 2,204  | 2  | 1,641 | 28 | 2,907 | 29 | 49   | 0  | 40     | 0  | 25  | 1  | 64  | 1  |
| Venezuela     | Sucre                   | 3321    | 3       | 902,407    | 0.0198 | 787   | 3  | 729    | 4  | 531   | 7  | 981   | 9  | 21   | 0  | 17     | 0  | 11  | 0  | 27  | 0  |
| Venezuela     | Zulia                   | 3325    | 4       | 4,230,060  | 0.0198 | 1,884 | 13 | 1,702  | 12 | 1,180 | 29 | 2,381 | 0  | 30   | 0  | 22     | 0  | 12  | 0  | 38  | 0  |

**EUROPE**

| Country | Admin1 unit            | GAUL  | Surveys | Population | CBR    | HbAS   |     |        |     |        |    |        |     | HbSS |    |        |    |     |    |     |    |
|---------|------------------------|-------|---------|------------|--------|--------|-----|--------|-----|--------|----|--------|-----|------|----|--------|----|-----|----|-----|----|
|         |                        |       |         |            |        | Mean   | SE  | Median | SE  | Q25    | SE | Q75    | SE  | Mean | SE | Median | SE | Q25 | SE | Q75 | SE |
| Belgium | Region wallonne        | 602   | 17      | 3,480,780  | 0.0114 | 668    | 2   | 641    | 2   | 516    | 3  | 784    | 3   | 8    | 0  | 7      | 0  | 5   | 0  | 10  | 0  |
| France  | Ile-de-France          | 1259  | 3       | 12,074,800 | 0.0124 | 5,827  | 15  | 5,574  | 21  | 4,318  | 20 | 7,110  | 26  | 116  | 1  | 99     | 1  | 64  | 1  | 151 | 1  |
| France  | Prov-Alpes-Cote-d'Azur | 1269  | 2       | 4,902,190  | 0.0124 | 1,110  | 6   | 951    | 8   | 587    | 5  | 1,464  | 12  | 19   | 0  | 12     | 0  | 5   | 0  | 24  | 0  |
| Greece  | Ipeiros                | 1341  | 3       | 342,146    | 0.0101 | 292    | 1   | 280    | 2   | 207    | 1  | 363    | 2   | 11   | 0  | 9      | 0  | 6   | 0  | 14  | 0  |
| Greece  | Kentriki Makedonia     | 1342  | 19      | 1,923,720  | 0.0101 | 1,064  | 5   | 1,018  | 6   | 776    | 6  | 1,301  | 7   | 31   | 0  | 27     | 0  | 18  | 0  | 39  | 0  |
| Greece  | Kriti                  | 1343  | 2       | 604,300    | 0.0101 | 35     | 1   | 16     | 0   | 4      | 0  | 46     | 1   | 1    | 0  | 0      | 0  | 0   | 0  | 0   | 0  |
| Greece  | Notio Aigaio           | 40766 | 3       | 305,049    | 0.0101 | 41     | 0   | 28     | 0   | 11     | 0  | 58     | 1   | 1    | 0  | 0      | 0  | 0   | 0  | 1   | 0  |
| Greece  | Stereia Ellada         | 1346  | 2       | 562,603    | 0.0101 | 502    | 1   | 490    | 2   | 381    | 1  | 609    | 2   | 20   | 0  | 18     | 0  | 11  | 0  | 26  | 0  |
| Italy   | Sardegna               | 1629  | 13      | 1,707,900  | 0.0091 | 30     | 0   | 26     | 0   | 18     | 0  | 37     | 0   | 0    | 0  | 0      | 0  | 0   | 0  | 0   | 0  |
| Italy   | Sicilia                | 1630  | 41      | 5,269,760  | 0.0091 | 792    | 10  | 765    | 10  | 644    | 10 | 910    | 12  | 11   | 0  | 10     | 0  | 8   | 0  | 14  | 0  |
| Spain   | Madrid, Comunidad De   | 2729  | 2       | 6,090,270  | 0.0106 | 705    | 3   | 576    | 5   | 336    | 3  | 934    | 6   | 7    | 0  | 4      | 0  | 2   | 0  | 9   | 0  |
| U.K.    | England                | 3182  | 5       | 51,767,000 | 0.0121 | 15,809 | 135 | 14,509 | 116 | 10,263 | 75 | 20,013 | 214 | 357  | 4  | 269    | 3  | 150 | 2  | 466 | 7  |

**Web Table 4: Global, regional and national rates of neonates affected (HbAS and HbSS) based on median estimates presented in this report (termed MAP) and on data calculated by Modell and Darlison (termed M&D). Births for 2003 and 2010 are shown in thousands and are based on the 2003 UN Demographic Yearbook and the 2010 UN World Population Prospects, respectively.**

| Country                               | Births<br>2003 | Births<br>2010 | MAP     |        |        |       | M&D      |          |       |
|---------------------------------------|----------------|----------------|---------|--------|--------|-------|----------|----------|-------|
|                                       |                |                | AS      |        | SS     |       | SS       |          |       |
|                                       |                |                | n       | %      | n      | %     | n (2003) | n (2010) | %     |
| Afghanistan                           | 1,176          | 1,232          | 144     | 0.12   | 0      | 0.00  | 0        | 0        | 0.00  |
| Albania                               | 47             | 40             | 1,391   | 34.41  | 30     | 0.74  | 11       | 10       | 0.24  |
| Algeria                               | 627            | 680            | 10,486  | 15.42  | 191    | 0.28  | 50       | 54       | 0.08  |
| Angola                                | 604            | 758            | 112,443 | 148.37 | 8,364  | 11.04 | 9,560    | 11,996   | 15.83 |
| Argentina                             | 697            | 683            | 444     | 0.65   | 4      | 0.01  | 0        | 0        | 0.00  |
| Armenia                               | 36             | 46             | 0       | 0.00   | 0      | 0.00  | 0        | 0        | 0.00  |
| Aruba                                 | 2              | 1              | 48      | 40.41  | 1      | 0.84  | 0        | 0        | 0.00  |
| Australia                             | 250            | 290            | 663     | 2.28   | 5      | 0.02  | 0        | 0        | 0.00  |
| Austria                               | 77             | 72             | 143     | 1.98   | 1      | 0.01  | 0        | 0        | 0.00  |
| Azerbaijan                            | 114            | 174            | 4       | 0.02   | 0      | 0.00  | 4        | 7        | 0.04  |
| Bahamas                               | 7              | 5              | 287     | 54.57  | 8      | 1.52  | 34       | 26       | 4.90  |
| Bahrain                               | 14             | 14             | 1,548   | 107.15 | 59     | 4.08  | 81       | 83       | 5.72  |
| Bangladesh                            | 3,536          | 3,206          | 3,459   | 1.08   | 16     | 0.00  | 0        | 0        | 0.00  |
| Barbados                              | 3              | 3              | 179     | 63.90  | 4      | 1.43  | 4        | 3        | 1.23  |
| Belarus                               | 89             | 107            | 0       | 0.00   | 0      | 0.00  | 0        | 0        | 0.00  |
| Belgium                               | 115            | 122            | 2,302   | 18.85  | 29     | 0.24  | 5        | 6        | 0.05  |
| Belize                                | 9              | 8              | 937     | 124.57 | 47     | 6.25  | 5        | 5        | 0.63  |
| Benin                                 | 264            | 353            | 64,207  | 181.84 | 4,543  | 12.87 | 3,561    | 4,768    | 13.50 |
| Bhutan                                | 27             | 14             | 4       | 0.28   | 0      | 0.00  | 0        | 0        | 0.00  |
| Bolivia (Plurinational State of)      | 300            | 258            | 6       | 0.02   | 0      | 0.00  | 0        | 0        | 0.00  |
| Bosnia and Herzegovina                | 36             | 31             | 120     | 3.91   | 1      | 0.03  | 0        | 0        | 0.00  |
| Botswana                              | 53             | 45             | 300     | 6.63   | 4      | 0.09  | 0        | 0        | 0.00  |
| Brazil                                | 3,633          | 2,932          | 101,138 | 34.50  | 3,244  | 1.11  | 764      | 617      | 0.21  |
| Brunei Darussalam                     | 7              | 7              | 0       | 0.00   | 0      | 0.00  | 0        | 0        | 0.00  |
| Bulgaria                              | 67             | 75             | 1,076   | 14.36  | 17     | 0.23  | 0        | 0        | 0.00  |
| Burkina Faso                          | 491            | 689            | 71,083  | 103.17 | 3,124  | 4.53  | 1,065    | 1,493    | 2.17  |
| Burundi                               | 274            | 284            | 24,365  | 85.88  | 889    | 3.13  | 2,449    | 2,533    | 8.93  |
| Cambodia                              | 460            | 325            | 0       | 0.00   | 0      | 0.00  | 0        | 0        | 0.00  |
| Cameroon                              | 569            | 697            | 109,857 | 157.72 | 6,915  | 9.93  | 5,906    | 7,231    | 10.38 |
| Canada                                | 364            | 383            | 3,004   | 7.85   | 45     | 0.12  | 43       | 45       | 0.12  |
| Cape Verde                            | 13             | 10             | 625     | 61.22  | 18     | 1.76  | 6        | 5        | 0.44  |
| Central African Republic              | 119            | 155            | 18,315  | 117.80 | 976    | 6.28  | 677      | 886      | 5.70  |
| Chad                                  | 366            | 499            | 43,553  | 87.20  | 2,045  | 4.09  | 908      | 1,239    | 2.48  |
| Chile                                 | 234            | 240            | 0       | 0.00   | 0      | 0.00  | 0        | 0        | 0.00  |
| China                                 | 15,976         | 16,442         | 43      | 0.00   | 0      | 0.00  | 0        | 0        | 0.00  |
| Colombia                              | 1,060          | 875            | 14,464  | 16.53  | 321    | 0.37  | 537      | 444      | 0.51  |
| Comoros                               | 25             | 25             | 1,105   | 44.79  | 25     | 1.01  | 0        | 0        | 0.02  |
| Congo                                 | 130            | 130            | 22,773  | 175.05 | 1,560  | 11.99 | 2,042    | 2,049    | 15.75 |
| Congo, the Democratic Republic of the | 2,325          | 2,856          | 489,745 | 171.50 | 38,217 | 13.38 | 20,113   | 24,698   | 8.65  |
| Costa Rica                            | 73             | 71             | 2,731   | 38.47  | 60     | 0.85  | 8        | 8        | 0.11  |
| Côte d'Ivoire                         | 720            | 712            | 74,168  | 104.19 | 3,567  | 5.01  | 1,564    | 1,546    | 2.17  |
| Croatia                               | 40             | 43             | 137     | 3.17   | 1      | 0.02  | 0        | 0        | 0.00  |
| Cuba                                  | 151            | 108            | 6,578   | 61.16  | 240    | 2.23  | 259      | 185      | 1.72  |
| Cyprus                                | 8              | 10             | 147     | 15.11  | 2      | 0.21  | 0        | 0        | 0.03  |
| Czech Republic                        | 94             | 113            | 59      | 0.52   | 0      | 0.00  | 0        | 0        | 0.00  |
| Denmark                               | 65             | 62             | 11      | 0.18   | 0      | 0.00  | 2        | 2        | 0.03  |
| Djibouti                              | 31             | 25             | 3       | 0.12   | 0      | 0.00  | 0        | 0        | 0.00  |
| Dominican Republic                    | 201            | 214            | 9,461   | 44.27  | 247    | 1.16  | 722      | 769      | 3.60  |
| Ecuador                               | 329            | 273            | 45      | 0.16   | 0      | 0.00  | 12       | 10       | 0.04  |

| Country                                | Births<br>2003 | Births<br>2010 | MAP     |        |        |       | M&D      |          |       |
|----------------------------------------|----------------|----------------|---------|--------|--------|-------|----------|----------|-------|
|                                        |                |                | AS      |        | SS     |       | SS       |          |       |
|                                        |                |                | n       | %      | n      | %     | n (2003) | n (2010) | %     |
| Egypt                                  | 1,774          | 1,884          | 47,754  | 25.35  | 1,196  | 0.63  | 19       | 21       | 0.01  |
| El Salvador                            | 125            | 124            | 4,039   | 32.57  | 80     | 0.65  | 8        | 8        | 0.07  |
| Equatorial Guinea                      | 18             | 25             | 5,059   | 203.35 | 385    | 15.48 | 182      | 249      | 10.00 |
| Eritrea                                | 151            | 179            | 767     | 4.28   | 9      | 0.05  | 0        | 0        | 0.00  |
| Estonia                                | 13             | 16             | 0       | 0.00   | 0      | 0.00  | 0        | 0        | 0.00  |
| Ethiopia                               | 2,380          | 2,550          | 11,197  | 4.39   | 137    | 0.05  | 1        | 2        | 0.00  |
| Fiji                                   | 17             | 18             | 0       | 0.00   | 0      | 0.00  | 0        | 0        | 0.00  |
| Finland                                | 57             | 61             | 0       | 0.00   | 0      | 0.00  | 0        | 0        | 0.00  |
| France                                 | 759            | 776            | 22,040  | 28.39  | 520    | 0.67  | 79       | 81       | 0.10  |
| French Guiana                          | 6              | 6              | 186     | 33.56  | 5      | 0.90  | 4        | 4        | 0.68  |
| French Polynesia                       | 4              | 4              | 0       | 0.00   | 0      | 0.00  | 0        | 0        | 0.00  |
| Gabon                                  | 46             | 41             | 9,342   | 230.51 | 864    | 21.32 | 736      | 643      | 15.88 |
| Gambia                                 | 58             | 65             | 8,657   | 133.98 | 418    | 6.47  | 305      | 342      | 5.30  |
| Georgia                                | 46             | 49             | 0       | 0.00   | 0      | 0.00  | 0        | 0        | 0.00  |
| Germany                                | 710            | 714            | 5,940   | 8.32   | 85     | 0.12  | 23       | 23       | 0.03  |
| Ghana                                  | 726            | 737            | 102,229 | 138.62 | 5,474  | 7.42  | 4,847    | 4,924    | 6.68  |
| Greece                                 | 105            | 113            | 6,667   | 58.97  | 206    | 1.82  | 1        | 1        | 0.01  |
| Grenada                                | 2              | 2              | 174     | 86.69  | 6      | 2.99  | 5        | 5        | 2.50  |
| Guadeloupe                             | 8              | 6              | 459     | 74.39  | 14     | 2.27  | 16       | 13       | 2.16  |
| Guam                                   | 3              | 3              | 0       | 0.00   | 0      | 0.00  | 0        | 0        | 0.00  |
| Guatemala                              | 375            | 453            | 10,285  | 22.71  | 252    | 0.56  | 0        | 0        | 0.00  |
| Guinea                                 | 310            | 388            | 70,965  | 182.82 | 5,232  | 13.48 | 4,325    | 5,418    | 13.96 |
| Guinea-Bissau                          | 53             | 62             | 5,011   | 81.35  | 192    | 3.12  | 0        | 0        | 1.83  |
| Guyana                                 | 16             | 13             | 622     | 46.95  | 17     | 1.28  | 11       | 9        | 0.68  |
| Haiti                                  | 249            | 262            | 26,801  | 102.35 | 1,088  | 4.16  | 622      | 655      | 2.50  |
| Honduras                               | 230            | 196            | 17,783  | 90.58  | 772    | 3.93  | 0        | 0        | 0.00  |
| Hong Kong                              | 47             | 64             | 0       | 0.00   | 0      | 0.00  | 0        | 0        | 0.00  |
| Hungary                                | 94             | 101            | 59      | 0.59   | 0      | 0.00  | 0        | 0        | 0.00  |
| Iceland                                | 4              | 5              | 0       | 0.00   | 0      | 0.00  | 0        | 0        | 0.00  |
| India                                  | 26,492         | 25,495         | 996,563 | 39.09  | 42,016 | 1.65  | 25,768   | 24,798   | 0.97  |
| Indonesia                              | 4,863          | 4,046          | 328     | 0.08   | 1      | 0.00  | 0        | 0        | 0.00  |
| Iran, Islamic Republic of              | 1,170          | 1,216          | 25,768  | 21.18  | 862    | 0.71  | 96       | 100      | 0.08  |
| Iraq                                   | 903            | 1,072          | 23,488  | 21.91  | 629    | 0.59  | 499      | 592      | 0.55  |
| Ireland                                | 62             | 72             | 60      | 0.84   | 0      | 0.00  | 0        | 0        | 0.00  |
| Italy                                  | 541            | 547            | 5,635   | 10.30  | 91     | 0.17  | 3        | 3        | 0.01  |
| Jamaica                                | 57             | 49             | 3,998   | 81.81  | 137    | 2.80  | 172      | 148      | 3.03  |
| Japan                                  | 1,123          | 1,079          | 0       | 0.00   | 0      | 0.00  | 0        | 0        | 0.00  |
| Jordan                                 | 148            | 153            | 6,365   | 41.57  | 145    | 0.95  | 4        | 4        | 0.03  |
| Kazakhstan                             | 247            | 325            | 1       | 0.00   | 0      | 0.00  | 0        | 0        | 0.00  |
| Kenya                                  | 1,121          | 1,507          | 98,471  | 65.35  | 4,475  | 2.97  | 7,872    | 10,578   | 7.02  |
| Korea, Democratic People's Republic of | 495            | 340            | 0       | 0.00   | 0      | 0.00  | 0        | 0        | 0.00  |
| Korea, Republic of                     | 494            | 480            | 0       | 0.00   | 0      | 0.00  | 0        | 0        | 0.00  |
| Kuwait                                 | 45             | 53             | 3,824   | 72.04  | 116    | 2.19  | 37       | 44       | 0.83  |
| Kyrgyzstan                             | 105            | 133            | 0       | 0.00   | 0      | 0.00  | 0        | 0        | 0.00  |
| Lao People's Democratic Republic       | 218            | 140            | 0       | 0.00   | 0      | 0.00  | 0        | 0        | 0.00  |
| Latvia                                 | 21             | 25             | 0       | 0.00   | 0      | 0.00  | 0        | 0        | 0.00  |
| Lebanon                                | 77             | 63             | 6,382   | 101.09 | 251    | 3.98  | 6        | 5        | 0.08  |
| Lesotho                                | 75             | 56             | 40      | 0.72   | 0      | 0.00  | 0        | 0        | 0.00  |
| Liberia                                | 127            | 154            | 13,217  | 85.69  | 562    | 3.64  | 105      | 127      | 0.82  |
| Libyan Arab Jamahiriya                 | 111            | 142            | 6,020   | 42.38  | 188    | 1.32  | 34       | 44       | 0.31  |
| Lithuania                              | 31             | 35             | 0       | 0.00   | 0      | 0.00  | 0        | 0        | 0.00  |
| Luxembourg                             | 5              | 6              | 48      | 8.26   | 0      | 0.00  | 0        | 0        | 0.06  |
| Madagascar                             | 609            | 697            | 69,295  | 99.41  | 3,379  | 4.85  | 2,084    | 2,383    | 3.42  |
| Malawi                                 | 579            | 698            | 47,370  | 67.85  | 1,688  | 2.42  | 917      | 1,106    | 1.58  |

| Country                          | Births<br>2003 | Births<br>2010 | MAP       |        |        |       | M&D      |          |       |
|----------------------------------|----------------|----------------|-----------|--------|--------|-------|----------|----------|-------|
|                                  |                |                | AS        |        | SS     |       | SS       |          |       |
|                                  |                |                | n         | %      | n      | %     | n (2003) | n (2010) | %     |
| Malaysia                         | 534            | 553            | 1         | 0.00   | 0      | 0.00  | 0        | 0        | 0.00  |
| Maldives                         | 5              | 5              | 0         | 0.00   | 0      | 0.00  | 0        | 0        | 0.01  |
| Mali                             | 494            | 601            | 56,236    | 93.53  | 2,701  | 4.49  | 4,421    | 5,385    | 8.96  |
| Malta                            | 4              | 4              | 143       | 38.33  | 2      | 0.54  | 0        | 0        | 0.00  |
| Martinique                       | 6              | 5              | 391       | 83.02  | 12     | 2.55  | 9        | 7        | 1.52  |
| Mauritania                       | 110            | 110            | 9,505     | 86.54  | 433    | 3.94  | 159      | 158      | 1.44  |
| Mauritius                        | 19             | 16             | 0         | 0.00   | 0      | 0.00  | 1        | 1        | 0.05  |
| Mayotte                          | 2              | 6              | 447       | 68.90  | 12     | 1.85  | 0        | 1        | 0.23  |
| Mexico                           | 2,564          | 2,045          | 31,120    | 15.21  | 641    | 0.31  | 105      | 84       | 0.04  |
| Micronesia, Federated States of  | 3              | 3              | 0         | 0.00   | 0      | 0.00  | 0        | 0        | 0.00  |
| Moldova, Republic of             | 36             | 43             | 1         | 0.02   | 0      | 0.00  | 0        | 0        | 0.00  |
| Mongolia                         | 46             | 61             | 0         | 0.00   | 0      | 0.00  | 0        | 0        | 0.00  |
| Montenegro                       | 87             | 8              | 72        | 9.18   | 1      | 0.13  | 0        | 0        | 0.00  |
| Morocco                          | 560            | 597            | 3,202     | 5.36   | 40     | 0.07  | 118      | 126      | 0.21  |
| Mozambique                       | 754            | 850            | 42,588    | 50.10  | 1,645  | 1.94  | 170      | 191      | 0.23  |
| Myanmar                          | 984            | 843            | 40        | 0.05   | 0      | 0.00  | 0        | 0        | 0.00  |
| Namibia                          | 65             | 56             | 1,138     | 20.42  | 30     | 0.54  | 10       | 9        | 0.15  |
| Nepal                            | 788            | 695            | 1,558     | 2.24   | 11     | 0.02  | 0        | 0        | 0.00  |
| Netherlands                      | 200            | 180            | 4,759     | 26.47  | 82     | 0.46  | 10       | 9        | 0.05  |
| Netherlands Antilles             | 4              | 3              | 150       | 57.09  | 4      | 1.52  | 9        | 7        | 2.50  |
| New Caledonia                    | 4              | 4              | 0         | 0.00   | 0      | 0.00  | 0        | 0        | 0.00  |
| New Zealand                      | 56             | 62             | 0         | 0.00   | 0      | 0.00  | 9        | 10       | 0.16  |
| Nicaragua                        | 190            | 133            | 6,514     | 49.08  | 204    | 1.54  | 4        | 3        | 0.02  |
| Niger                            | 506            | 758            | 90,671    | 119.66 | 4,965  | 6.55  | 6,046    | 9,045    | 11.94 |
| Nigeria                          | 4,895          | 6,219          | 1,136,909 | 182.80 | 85,186 | 13.70 | 77,192   | 98,083   | 15.77 |
| Norway                           | 57             | 60             | 0         | 0.00   | 0      | 0.00  | 2        | 2        | 0.04  |
| Oman                             | 90             | 50             | 32        | 0.64   | 0      | 0.00  | 222      | 124      | 2.47  |
| Pakistan                         | 3,913          | 4,859          | 18,962    | 3.90   | 228    | 0.05  | 101      | 126      | 0.03  |
| Panama                           | 63             | 67             | 4,457     | 66.53  | 140    | 2.09  | 8        | 9        | 0.13  |
| Papua New Guinea                 | 175            | 200            | 0         | 0.00   | 0      | 0.00  | 0        | 0        | 0.00  |
| Paraguay                         | 168            | 153            | 664       | 4.34   | 7      | 0.05  | 0        | 0        | 0.00  |
| Peru                             | 649            | 578            | 2         | 0.00   | 0      | 0.00  | 25       | 22       | 0.04  |
| Philippines                      | 1,703          | 2,294          | 0         | 0.00   | 0      | 0.00  | 0        | 0        | 0.00  |
| Poland                           | 351            | 415            | 59        | 0.14   | 0      | 0.00  | 0        | 0        | 0.00  |
| Portugal                         | 113            | 90             | 2,170     | 24.11  | 41     | 0.46  | 3        | 2        | 0.03  |
| Puerto Rico                      | 59             | 52             | 326       | 6.32   | 2      | 0.04  | 23       | 21       | 0.40  |
| Qatar                            | 13             | 17             | 1,365     | 78.02  | 41     | 2.34  | 7        | 10       | 0.55  |
| Réunion                          | 14             | 14             | 6         | 0.42   | 0      | 0.00  | 1        | 1        | 0.10  |
| Romania                          | 213            | 218            | 320       | 1.46   | 2      | 0.01  | 0        | 0        | 0.00  |
| Russian Federation               | 1,475          | 1,656          | 14        | 0.01   | 0      | 0.00  | 0        | 0        | 0.00  |
| Rwanda                           | 313            | 417            | 22,857    | 54.78  | 601    | 1.44  | 125      | 167      | 0.40  |
| Saint Lucia                      | 3              | 3              | 311       | 105.76 | 12     | 4.08  | 7        | 7        | 2.50  |
| Saint Vincent and the Grenadines | 2              | 2              | 176       | 98.46  | 6      | 3.36  | 2        | 2        | 1.16  |
| Samoa                            | 5              | 13             | 0         | 0.00   | 0      | 0.00  | 0        | 0        | 0.00  |
| Saudi Arabia                     | 766            | 561            | 19,447    | 34.68  | 691    | 1.23  | 5,397    | 3,950    | 7.04  |
| Sao Tome and Principe            | 6              | 5              | 763       | 154.66 | 41     | 8.31  | 49       | 40       | 8.10  |
| Senegal                          | 407            | 462            | 53,002    | 114.75 | 2,535  | 5.49  | 1,895    | 2,153    | 4.66  |
| Serbia                           | 87             | 108            | 830       | 7.67   | 10     | 0.09  | 0        | 0        | 0.00  |
| Sierra Leone                     | 246            | 213            | 39,530    | 185.56 | 2,838  | 13.32 | 3,243    | 2,808    | 13.18 |
| Singapore                        | 46             | 45             | 0         | 0.00   | 0      | 0.00  | 0        | 0        | 0.00  |
| Slovakia                         | 52             | 58             | 12        | 0.21   | 0      | 0.00  | 0        | 0        | 0.00  |
| Slovenia                         | 17             | 20             | 22        | 1.10   | 0      | 0.00  | 0        | 0        | 0.00  |
| Solomon Islands                  | 15             | 16             | 0         | 0.00   | 0      | 0.00  | 0        | 0        | 0.00  |
| Somalia                          | 505            | 402            | 1,192     | 2.96   | 13     | 0.03  | 0        | 0        | 0.00  |



| Country                           | Births<br>2003 | Births<br>2010 | MAP     |        |        |       | M&D      |          |      |
|-----------------------------------|----------------|----------------|---------|--------|--------|-------|----------|----------|------|
|                                   |                |                | AS      |        | SS     |       | SS       |          |      |
|                                   |                |                | n       | %      | n      | %     | n (2003) | n (2010) | %    |
| South Africa                      | 1,258          | 1,036          | 4,946   | 4.78   | 73     | 0.07  | 0        | 0        | 0.00 |
| Spain                             | 440            | 480            | 7,324   | 15.25  | 149    | 0.31  | 0        | 1        | 0.00 |
| Sri Lanka                         | 363            | 347            | 425     | 1.22   | 2      | 0.01  | 0        | 0        | 0.00 |
| Sudan                             | 1,157          | 1,378          | 98,244  | 71.32  | 4,567  | 3.32  | 483      | 575      | 0.42 |
| Suriname                          | 10             | 9              | 653     | 69.97  | 19     | 2.04  | 13       | 12       | 1.30 |
| Swaziland                         | 36             | 34             | 398     | 11.61  | 4      | 0.12  | 1        | 1        | 0.03 |
| Sweden                            | 99             | 112            | 2       | 0.02   | 0      | 0.00  | 4        | 5        | 0.04 |
| Switzerland                       | 81             | 76             | 622     | 8.19   | 6      | 0.08  | 0        | 0        | 0.00 |
| Syrian Arab Republic              | 493            | 496            | 24,448  | 49.34  | 901    | 1.82  | 66       | 66       | 0.13 |
| Tajikistan                        | 178            | 196            | 0       | 0.00   | 0      | 0.00  | 0        | 0        | 0.00 |
| Tanzania, United Republic of      | 1,232          | 1,846          | 203,747 | 110.36 | 11,022 | 5.97  | 8,655    | 12,965   | 7.02 |
| Thailand                          | 1,054          | 784            | 0       | 0.00   | 0      | 0.00  | 0        | 0        | 0.00 |
| Timor-Leste                       | 28             | 44             | 0       | 0.00   | 0      | 0.00  | 0        | 0        | 0.00 |
| Togo                              | 202            | 210            | 34,057  | 162.19 | 2,175  | 10.36 | 1,746    | 1,816    | 8.65 |
| Trinidad and Tobago               | 19             | 19             | 1,648   | 85.75  | 56     | 2.91  | 30       | 31       | 1.60 |
| Tonga                             | 2              | 3              | 0       | 0.00   | 0      | 0.00  | 0        | 0        | 0.00 |
| Tunisia                           | 166            | 171            | 4,420   | 25.82  | 81     | 0.47  | 63       | 64       | 0.38 |
| Turkey                            | 1,478          | 1,279          | 12,852  | 10.05  | 330    | 0.26  | 116      | 100      | 0.08 |
| Turkmenistan                      | 139            | 110            | 4       | 0.04   | 0      | 0.00  | 0        | 0        | 0.00 |
| Uganda                            | 1,164          | 1,484          | 189,801 | 127.92 | 10,143 | 6.84  | 8,216    | 10,469   | 7.06 |
| Ukraine                           | 410            | 495            | 33      | 0.07   | 0      | 0.00  | 0        | 0        | 0.00 |
| United Arab Emirates              | 75             | 57             | 402     | 7.03   | 4      | 0.07  | 24       | 18       | 0.32 |
| United Kingdom                    | 697            | 749            | 15,746  | 21.02  | 296    | 0.40  | 108      | 116      | 0.16 |
| United States of America          | 4,194          | 4,353          | 100,150 | 23.01  | 2,843  | 0.65  | 838      | 869      | 0.20 |
| Uruguay                           | 51             | 49             | 82      | 1.68   | 1      | 0.02  | 0        | 0        | 0.00 |
| Uzbekistan                        | 520            | 578            | 1       | 0.00   | 0      | 0.00  | 0        | 0        | 0.00 |
| Vanuatu                           | 6              | 7              | 0       | 0.00   | 0      | 0.00  | 0        | 0        | 0.00 |
| Venezuela, Bolivarian Republic of | 492            | 575            | 19,272  | 33.51  | 435    | 0.76  | 108      | 126      | 0.22 |
| Viet Nam                          | 1,807          | 1,415          | 0       | 0.00   | 0      | 0.00  | 0        | 0        | 0.00 |
| Virgin Islands, U.S.              | 2              | 1              | 25      | 18.96  | 0      | 0.00  | 4        | 2        | 1.60 |
| Western Sahara                    | 9              | 9              | 144     | 15.32  | 3      | 0.32  | 2        | 2        | 0.21 |
| Yemen                             | 930            | 905            | 6,411   | 7.08   | 80     | 0.09  | 119      | 116      | 0.13 |
| Zambia                            | 457            | 616            | 88,801  | 144.09 | 5,652  | 9.17  | 3,346    | 4,517    | 7.33 |
| Zimbabwe                          | 408            | 363            | 16,345  | 45.04  | 483    | 1.33  | 162      | 144      | 0.40 |

| WHO regions | Births<br>2003 | Births<br>2010 | MAP       |        |         |      | M&D         |             |                  |
|-------------|----------------|----------------|-----------|--------|---------|------|-------------|-------------|------------------|
|             |                |                | AS        |        | SS      |      | SS          |             |                  |
|             |                |                | n         | %      | n       | %    | n<br>(2003) | n<br>(2010) | %<br>(2003/2010) |
| AFRO        | 22,895         | 31,755         | 3,610,851 | 113.71 | 238,083 | 7.50 | 184,812     | 232,336     | 8.07/7.32        |
| AMRO        | 16,609         | 15,210         | 391,257   | 25.72  | 13,104  | 0.86 | 4,432       | 4,156       | 0.27/0.27        |
| EMRO        | 16,798         | 13,971         | 256,643   | 18.37  | 8,239   | 0.59 | 7,389       | 6,072       | 0.44/0.43        |
| EURO        | 10,459         | 10,976         | 121,601   | 11.08  | 3,271   | 0.30 | 376         | 368         | 0.04/0.03        |
| SEARO       | 38,139         | 35,820         | 1,020,489 | 28.49  | 42,597  | 1.19 | 25,768      | 24,798      | 0.68/0.69        |
| WPRO        | 23,914         | 23,535         | 1,150     | 0.05   | 9       | 0.00 | 9           | 10          | 0.00/0.00        |

| World | Births<br>2003 | Births<br>2010 | MAP       |       |         |      | M&D         |             |                  |
|-------|----------------|----------------|-----------|-------|---------|------|-------------|-------------|------------------|
|       |                |                | AS        |       | SS      |      | SS          |             |                  |
|       |                |                | n         | %     | n       | %    | n<br>(2003) | n<br>(2010) | %<br>(2003/2010) |
| WORLD | 128,814        | 131,266        | 5,476,407 | 41.72 | 312,302 | 2.38 | 222,785     | 267,740     | 1.73/2.04        |

**Web Table 5.** MCMC output parameter values. Summary statistics presented are the mean and median values, standard deviation (std), interquartile range (IQR) and 95% Bayesian credible interval (95 BCI). The scale parameter is measured in units of earth radii. Values are presented to two significant figures.

| <b>Parameter</b>            | <b>Symbol</b> | <b>Mean</b> | <b>Median</b> | <b>Std</b> | <b>IQR</b> | <b>95 BCI</b> |
|-----------------------------|---------------|-------------|---------------|------------|------------|---------------|
| Nugget variance             | $V$           | 0.450       | 0.443         | 0.079      | 0.062      | 0.204         |
| Amplitude (or partial sill) | $\varphi$     | 2.715       | 2.665         | 0.348      | 0.174      | 0.836         |
| Scale (or range)            | $\theta$      | 0.199       | 0.199         | 0.001      | 0.001      | 0.003         |

**Web Table 6.** Summary of data selection, mapping and modelling assumptions and suggestions for future improvements.

Data

---

- We assumed that surveys not reporting any selection bias in the sampling methodology were representative of the local population.*  
A complete and consistent description of the sampling method used would remove any ambiguity about the representativeness of the sample.
- We assumed that surveys targeting specific ethnic groups could not be included.*  
Studies targeting a specific ethnic group cannot be considered representative of the overall local population. Provided that the sample size is not too small, random or universal surveys testing all ethnic groups without selection bias can be considered as representative.
- We assumed that surveys georeferenced at the province or country level were too imprecise to be included.*  
Micromapping studies have shown that HbS allele frequency can highly vary over short distances. Surveys testing individuals from all over a region or country without giving the individuals' origin could not be used. Similarly, surveys not reporting the location of the survey also had to be excluded. Systematic reporting of basic geographical information would increase the number of included studies.
- We assumed that the diagnostic method had a minimum effect on the testing results.*  
The diagnostic method is not consistently reported. Most diagnostic methods for sickle haemoglobin can be considered as reliable.
- We assumed that interactions between HbS, HbC and  $\beta$ -thalassaemias were complex.*  
The number of individuals with compound status is relatively small and data available is very limited. Calculating newborn estimates for these compound individuals would require both the availability of a similar database on HbC and  $\beta$ -thalassaemia, and a good understanding of their interactions.

Mapping and modelling process

---

- We assumed that the crude birth rate was homogeneous within a country.*  
No data on crude birth rate are consistently available at sub-national levels. Local or national studies could allow us to incorporate more precise information.
- We assumed that populations were in Hardy-Weinberg equilibrium (HWE), and derived HbS allele frequency based on this assumption.*  
In some cases, we have observed differences between observed and HWE predicted genotype counts but there is currently not enough information on this relationship to use it within a global model.
- We assumed that information on consanguinity was too crude to be incorporated.*  
Information on consanguinity is not consistently reported in surveys. Moreover, although there is some global information (e.g. [www.consang.net](http://www.consang.net)), only crude national information is available. Including such data in the model would likely have resulted in adding more uncertainty in the predictions.
- We assumed that the amount of data available was not sufficient to develop a spatio-temporal model.*  
Large amounts of data are required in order to analyse temporal changes at the global scale. Such a study might be possible in data-rich areas.

**Web Dataset. List of published and unpublished sources from which data have been used as input into our model.** Other references are ordered alphabetically by surname.

1. Abdulsalam AA, Bashour HN, Monem FS, Hamadeh FM. Pregnancy outcomes among Palestinian refugee women with sickle cell trait in Damascus, Syria. *Saudi Med J.* 2003; **24**(9): 986-90.
2. Acemoglu H, Beyhun NE, Vancelik S, Polat H, Guraksin A. Thalassaemia screening in a non-prevalent region of a prevalent country (Turkey): is it necessary? *Public Health.* 2008; **122**(6): 620-4.
3. Achidi EA, Salimonu LS, Asuzu MC, Berzins K, Walker O. Studies on *Plasmodium falciparum* parasitemia and development of anemia in Nigerian infants during their first year of life. *Am J Trop Med Hyg.* 1996; **55**(2): 138-43.
4. Acquaye CTA, Oldham JH. Variants of haemoglobin and glucose-6-phosphate dehydrogenase - I. Distribution in Southern Ghana. *Ghana Med J.* 1973; **12**: 412-8.
5. Adewuyi JO, Gwanzura C. Frequency of the sickle haemoglobin gene in Zimbabwe. *East Afr Med J.* 1994; **71**(3): 204-6.
6. Adeyemo OA, Soboyejo OB. Frequency distribution of ABO, RH blood groups and blood genotypes among the cell biology and genetics students of University of Lagos, Nigeria. *Afr J Biotechnol.* 2006; **5**(22): 2062-5.
7. Agrawal HN. A genetic survey among the Bantus of Andaman. *Bulletin of the Anthropological Survey India.* 1963; **12**: 143-7.
8. Agrawal HN. A study of the ABO blood groups. P.T.C. taste sensitivity, middle phalangeal hair and sickle cell trait among three Nicobarese groups of Nicobar Archipelago. *Bulletin of the Anthropological Survey India.* 1964; **13**: 63-8.
9. Agrawal HN. A short note on a study of A.B.O. blood groups, P.T.C. taste sensitivity, middle phalangeal hairs and sickle cell trait among the Wad Balgel of Andhra Pradesh. *Bulletin of the Anthropological Survey India.* 1964; **13**: 111-3.
10. Agrawal HN. A study of ABO blood groups. P.T.C. taste sensitivity, sickle cell trait and middle phalangeal hairs among the Burmese immigrants of Andaman Islands. *Eastern Anthropologist.* 1966; **19**: 107-16.
11. Agrawal HN. ABO blood group and the sickle cell investigations among the Shompen of Great Nicobar. *Journal of the Indian Anthropological Society.* 1966; **1**: 149-50.
12. Agrawal HN. ABO blood groups, P.T.C. taste sensitivity, sickle cell trait, middle phalangeal hairs, and colour blindness in the coastal Nicobarese of Great Nicobar. *Acta Genet Stat Med.* 1968; **18**(2): 147-54.
13. Ágreda F, Arcia E, Jované S, Pino E, Tufiño E, Lagrutta F. Frecuencia de Portadores del Alelo S en la Población de 15 - 49 Años de Portobelo. Panamá. Junio 2004. *Revista Médico Científica.* 2004; **17**(2): 66-70.
14. Ahern EJ, Swan AV, Ahern VN. The prevalence of the rarer inherited haemoglobin defects in adult Jamaicans. *Br J Haematol.* 1973; **25**(4): 437-44.
15. Aidoo M, Terlouw DJ, Kolczak MS, McElroy PD, ter Kuile FO, Kariuki S, et al. Protective effects of the sickle cell gene against malaria morbidity and mortality. *Lancet.* 2002; **359**(9314): 1311-2.
16. Akinkugbe FM. Anaemia in a rural population in Nigeria (Ilorin). *Ann Trop Med Parasitol.* 1980; **74**(6): 625-33.
17. Akoglu T, Ozer FL, Akoglu E. The coincidence of glucose-6-phosphate dehydrogenase deficiency and hemoglobin S gene in Cukurova Province, Turkey. *Am J Epidemiol.* 1986; **123**(4): 677-80.
18. Aksoy M. Sickle-cell trait in South Turkey. *Lancet.* 1955; **1**: 589.
19. Aksoy M. Hemoglobin S in Eti-Turks and the Allewits in Lebanon. *Blood.* 1961; **17**: 657-9.
20. Al-Awamy BH, Al-Musan M, Al-Turki M, Serjeant GR. Neonatal screening for sickle cell disease in the Eastern Province of Saudi Arabia. *Trans R Soc Trop Med Hyg.* 1984; **78**: 792-4.
21. Alexanderides C. Sur la fréquence des hemoglobinopathies mediterraneenes en Grece. *Proceedings of the 9th Congress of the European Society for Haematology (Lisbon, 1963) S, Karger; 1963; New York; 1963. p. 477-95.*

22. Alkindi S, Al Zadjali S, Al Madhani A, Daar S, Al Haddabi H, Al Abri Q, et al. Forecasting hemoglobinopathy burden through neonatal screening in Omani neonates. *Hemoglobin*. 2010; **34**(2): 135-44.
23. Allard R. A propos de la conservation génétique du sickle cell trait. *Ann Soc Belg Med Trop*. 1955; **35**(6): 649-60.
24. Allbrook D, Barnicot NA, Dance N, Lawler SD, Marshall R, Mungai J. Blood groups, haemoglobin and serum factors of the Karamojo. *Hum Biol*. 1965; **37**(3): 217-37.
25. Allen SJ, Bennett S, Riley EM, Rowe PA, Jakobsen PH, O'Donnell A, et al. Morbidity from malaria and immune responses to defined *Plasmodium falciparum* antigens in children with sickle cell trait in The Gambia. *Trans R Soc Trop Med Hyg*. 1992; **86**(5): 494-8.
26. Allen SJ, Rowe P, Allsopp CE, Riley EM, Jakobsen PH, Hill AV, et al. A prospective study of the influence of alpha thalassaemia on morbidity from malaria and immune responses to defined *Plasmodium falciparum* antigens in Gambian children. *Trans R Soc Trop Med Hyg*. 1993; **87**(3): 282-5.
27. Allison AC. The sickle-cell trait in the mediterranean area. *Man*. 1953; **53**: 31.
28. Allison AC. The distribution of the sickle-cell trait in East Africa and elsewhere, and its apparent relationship to the incidence of subtertian malaria. Protection afforded by sickle-cell trait against subtertian malarial infection. *Trans R Soc Trop Med Hyg*. 1954; **48**(4): 312-8.
29. Allison AC. The sickle-cell and haemoglobin C genes in some African populations. *Ann Hum Genet*. 1956; **21**(1): 67-89.
30. Allison AC, Ikin EW, Mourant AE, Raper AB. Blood groups and other genetic traits in East African tribes. *Journal of The Royal Anthropological Institute of Great Britain and Ireland*. 1952; **82**: 55-60.
31. Almeida AM, Henthorn JS, Davies SC. Neonatal screening for haemoglobinopathies: the results of a 10-year programme in an English Health Region. *Br J Haematol*. 2001; **112**(1): 32-5.
32. Al-Nood H, Al-Ismael S, King L, May A. Prevalence of the sickle cell gene in Yemen: a pilot study. *Hemoglobin*. 2004; **28**(4): 305-15.
33. al-Nuaim L, Talib ZA, el-Hazmi MA, Warsy AS. Sickle cell and G-6-PD deficiency gene in cord blood samples: experience at King Khalid University Hospital, Riyadh. *J Trop Pediatr*. 1997; **43**(2): 71-4.
34. Aluoch JR. Higher resistance to *Plasmodium falciparum* infection in patients with homozygous sickle cell disease in western Kenya. *Trop Med Int Health*. 1997; **2**(6): 568-71.
35. Alusala DN, Estambale BB, Magnussen P, Friis H, Luoba AI, Mwaniki D. Predictors of serum ferritin and haemoglobin during pregnancy, in a malaria-endemic area of western Kenya. *Ann Trop Med Parasitol*. 2008; **102**(4): 297-308.
36. Amano H, Yamamoto T, Kurata S, Sano A, Takahashi Y. The correlation between Hb-S and malaria in Brazzaville, Congo (author's transl). *Jpn J Hum Genet*. 1974; **19**: 65-6.
37. Arends. Data for Venezuela. 2009.
38. Arends A. Data for Venezuela. 2010.
39. Arends T. Absence of abnormal haemoglobins in Colombian Tunebo Indians. *Nature*. 1961; **190**: 93-4.
40. Arends T. [Current status of the study of abnormal hemoglobins in Venezuela]. *Sangre (Barc)*. 1963; **8**: 1-14.
41. Arends T. Frecuencia de hemoglobinas anormales en poblaciones humanas sudamericanas. *Acta Cient Venez*. 1963; **14**(Suppl I): 46-57.
42. Arends T, Brewer G, Chagnon N, Gallango ML, Gershowitz H, Layrisse M, et al. Intratribal genetic differentiation among the Yanomama Indians of southern Venezuela. *Proc Natl Acad Sci U S A*. 1967; **57**(5): 1252-9.
43. Arends T, Gallango ML, Muller A, Gonzalez-Marroro M, Perez Bandez O. Tapipa: a negroid Venezuelan isolate. *Papers IX. International Congress on Anthropological and Ethnological Sciences; 1973; Chicago; 1973. p. 1.*
44. Arends T, Garlin G, Anchustogut M, Arends T. Variants hemoglobínicas *Gamma* type de talasemia de origen espanol en la poblacion venecolana. *Sangre (Barc)*. 1983; **28**: 542-50.

45. Asghar M, Sachdeva MP. Glucose-6-phosphate dehydrogenase deficiency and sickle cell hemoglobin among the Dhodias of Dadra Nagar Haveli. *Anthropologist*. 2009; **11**(1): 61-2.
46. Atkinson SH, Rockett K, Sirugo G, Bejon PA, Fulford A, O'Connell MA, et al. Seasonal childhood anaemia in West Africa is associated with the haptoglobin 2-2 genotype. *PLoS Med*. 2006; **3**(5): e172.
47. Aung Than B, Pe UH. Haemoglobinopathies in Burma. I. The incidence of haemoglobin E. *Trop Geogr Med*. 1971; **23**: 15-9.
48. Auricchio MTBDM, Vicente JP, Meyer D, Mingroni-Netto RC. Frequency and origins of hemoglobin S mutation in African-derived Brazilian populations. *Hum Biol*. 2007; **79**(6): 667-77.
49. Ayodo G, Price AL, Keinan A, Ajwang A, Otieno MF, Orago ASS, et al. Combining evidence of natural selection with association analysis increases power to detect malaria-resistance variants. *Am J Hum Genet*. 2007; **81**(2): 234-42.
50. Azevedo ES, Alves AFP, Da Silva MCBO, Souza M Das GF, Muniz Dias Lima AM, Azevedo WC. Distribution of abnormal hemoglobins and glucose-6-phosphate dehydrogenase variants in 1200 school children of Bahia, Brazil. *Am J Phys Anthropol*. 1980; **53**: 509-12.
51. Azevedo ES, Costa Silva KM, Da Silva MCBO, Dias Lima AM, Mascaronhas Fortuna CM, Santos MG. Genetic and anthropological studies in the island of Itaparica, Bahia, Brazil. *Hum Hered*. 1981; **31**(6): 353-7.
52. Baghernajad-Salehi L, D'Apice MR, Babameto-Laku A, Biancolella M, Mitre A, Russo S, et al. A pilot beta-thalassaemia screening program in the Albanian population for a health planning program. *Acta Haematol*. 2009; **121**(4): 234-8.
53. Balgir RS. Genetic heterogeneity of population structure in 15 major scheduled tribes in central-eastern India: A study of immuno-hematological disorders. *Indian Journal of Human Genetics*. 2006; **12**(2): 86-92.
54. Ballas SK, Park D, Wapner RJ. Neonatal screening for sickle cell disease in a metropolitan university hospital: efficacy and problems. *J Med Screen*. 1994; **1**(4): 229-32.
55. Barclay GP, Jones HI, Splaine M. A survey of the of sickle cell trait and glucose-6-phosphate dehydrogenase deficiency in Zambia. *Trans R Soc Trop Med Hyg*. 1970; **64**: 78-93.
56. Barclay GP, Splaine M. The distribution of the sickle cell trait in Zambia. *Trop Geogr Med*. 1972; **24**: 393-400.
57. Barnicot NA, Allison AC, Blumberg BS, Deliyannis G, Krimbas C, Ballas A. Haemoglobin types in Greek populations. *Ann Hum Genet*. 1963; **26**: 229-36.
58. Barnicot NA, Ikin EW, Mourant AE. Les groupes sanguins ABB, MNS, et Rh des Touaregs de l'air. *L'Anthropologie*. 1954; **58**: 231-40.
59. Basu A, Namboodiri KK, Weitkamp LR, Brown WH, Pollitzer WS, Spivey MA. Morphology, serology, dermatoglyphics, and microevolution of some village populations in Haiti, West Indies. *Hum Biol*. 1976; **48**(2): 245-69.
60. Basu S, Kumar A, Sachdeva MP, Saraswathy KN. Incidence of NESTROFT-positives and haemoglobin S among the Jats and Brahmins of Sampla, Haryana. *Anthropologist*. 2008; **10**(3): 203-5.
61. Bayoumi RA, Omer A, Samuel AP, Saha N, Sebai ZA, Sabaa HM. Haemoglobin and erythrocytic glucose-6-phosphate dehydrogenase variants among selected tribes in Western Saudi Arabia. *Trop Geogr Med*. 1979; **31**(2): 245-52.
62. Beall CM, Decker MJ, Brittenham GM, Kushner I, Gebremedhin A, Strohl KP. An Ethiopian pattern of human adaptation to high-altitude hypoxia. *Proc Natl Acad Sci U S A*. 2002; **99**(26): 17215-8.
63. Becquet R, Gasteau T, Happi C. Drepanocytosis in Pays Bamileke (Cameroons). Statistical study. *Bull Soc Pathol Exot Filiales*. 1959; **52**: 836-43.
64. Ben Rachid MS, Farhat M, Brumpt LC. Hemoglobinopathie s en Tunisie. *Nouv Rev Fr Hematol*. 1967; **7**: 393-400.
65. Benoist J. Anthropologie physique de la population de l'ilo de la tortue (Haiti). Contribution à l'étude de l'origine des noirs des antilles françaises. *Bull Mem Soc Anthropol Paris*. 1962; **3**(11): 315-35.
66. Bernstein SC, Bowman JE, Kaptue Noche L. Population studies in Cameroon: hbs, G-6pd deficiency and falciparum malaria. *Hum Hered*. 1980; **30**: 251-8.

67. Beuzard Y, Caburl-Martin J, Auffret C, Rouyer-Fessard P, Kleman K, Lubin B, et al. Depistage des hemoglobinopathies dans le sang de cordon par isoelectrofocalisation. *Nouv Rev Fr Hematol.* 1979; **21**(Suppl 1): 126.
68. Bianco I, Graziani B, Salvini P, Mastro Monaco I, Silvestroni E. [Incidence and characters of alpha-microcythaemia in the populations of northern Sardinia. Early findings]. *Nouv Rev Fr Hematol.* 1972; **12**(2): 191-200.
69. Bienzle U, Komp H, Feldheim M, Reimer A, Steffen E, Guggenmoos-Holzmann I. The distribution and interaction of haemoglobin variants and the beta thalassaemia gene in Liberia. *Hum Genet.* 1983; **63**(4): 400-3.
70. Bienzle U, Okoye VC, Gogler H. Haemoglobin and glucose-6-phosphate dehydrogenase variants: distribution in relation to malaria endemicity in a Togolese population. *Z Tropenmed Parasitol.* 1972; **23**(1): 56-62.
71. Biondi G, Calandra PL, Coppa A, Falcone G, Rickards O, Vecchi F. Distribution of the S and C hemoglobins in Atakora District (Benin). *Human biology; an international record of research.* 1980; **52**(2): 205-13.
72. Blackwell RQ, Tung-Hsiang Huang J, Chien LC. Abnormal hemoglobin characteristics of Taiwan aborigines. *Human biology; an international record of research.* 1965; **37**(4): 343-56.
73. Blake NM, Ramesh A, Vijayakumar M, Murty JS, Bhatia KK. Genetic studies on some tribes of the Telangana region, Andhra, Pradesh, India. *Acta Anthropogenet.* 1981; **5**(1): 41-56.
74. Blakebrough IS, Greenwood BM, Whittle HC, Bradley AK, Akintunde A. Sick cell trait and the immune response to meningococcal vaccines. *Trans R Soc Trop Med Hyg.* 1981; **75**(6): 905-6.
75. Bloch M, Rivera H. [Abnormal hemoglobins and glucose-6-phosphate dehydrogenase deficiency in El Salvador]. *Sangre (Barc).* 1969; **14**(2): 121-4.
76. Blumberg BS, Allison AC, Garry B. The haptoglobins and haemoglobins of Alaskan Eskimos and Indians. *Ann Hum Genet.* 1959; **23**: 349-56.
77. Bobhate SK, Kabinwar N, Sonule SS. Incidence of sickle cell disease in Chandrapur area. *Indian J Med Sci.* 1983; **37**(11): 201-3.
78. Boemer F, Vanbellinthen JF, Bours V, Schoos R. Screening for sickle cell disease on dried blood: a new approach evaluated on 27,000 Belgian newborns. *J Med Screen.* 2006; **13**(3): 132-6.
79. Bouloux C, Gomila J, Langaney A. Hemotypology of the Bedik. *Human biology; an international record of research.* 1972; **44**(2): 289-302.
80. Boyer SH, Crosby EF, Fuller GF, Ulenurm L, Buck AA. A survey of hemoglobins in the Republic of Chad and characterization of hemoglobin Chad:alpha-2-23Glu--Lys-beta-2. *Am J Hum Genet.* 1968; **20**(6): 570-8.
81. Boyo AE. Starch gel electrophoresis of the haemoglobin of Nigerian children. A preliminary investigation of the incidence of thalassaemia. *The West African medical journal.* 1963; **12**: 75-81.
82. Breguet G, Ney R, Kirk RL, Blake NM. Genetic survey of an isolated community in Bali, Indonesia. II. Haemoglobin types and red cell isozymes. *Hum Hered.* 1982; **32**(5): 308-17.
83. Brittenham G, Lozoff B, Harris JW, Mayson SM, Miller A, Huisman TH. Sick cell anemia and trait in southern India: further studies. *Am J Hematol.* 1979; **6**(2): 107-23.
84. Brittenham G, Lozoff B, Harris JW, Sharma VS, Narasimhan S. Sick cell anemia and trait in a population of southern India. *Am J Hematol.* 1977; **2**(1): 25-32.
85. Bronte-Stewart B, Budtz-Olsen DE, Hickley JM, Brock JF. The health and nutritional status of the kung Bushmen of Southwest Africa. *South African Journal of Laboratory and Clinical Medicine.* 1960; **6**: 187-216.
86. Bruce-Tagoe AA, Belcher DW, Wurapa FK, Turkson P, Nicholas DD, Ofosu-Amaah S. Haematological values in a rural Ghanaian population. *Trop Geogr Med.* 1977; **29**(3): 237-44.
87. Buchi EC. [Blut, Geshmack, and Farbensinn bei den Kurumba (Nilgiri, Sudindien)]. *Arch Julius Klaus Stift Vererbungsforsch Sozialanthropol Rassenhyg.* 1959; **34**: 310-6.
88. Buettner Janusch J, Bove JR, Young N. Genetic Traits and Problems of Biological Parenthood in Two Peruvian Indian Tribes. *Am J Phys Anthropol.* 1964; **22**: 149-54.
89. Buettner Janusch J, Buettner Janusch V. Haemoglobin S in the Malagasy. *Arch Inst Pasteur Madag.* 1970; **39**: 211-4.

90. Buettner-Janusch J, Buettner-Janusch V. Hemoglobins, haptoglobins, and transferrins in indigenous populations of Kenya. *Am J Phys Anthropol.* 1970; **32**(1): 27-32.
91. Cabannes R. Repartition des haemoglobines anormales dans la partie ouest du continent Africain. In: Jonxis JHP, editor. *Abnormal Haemoglobins in Africa*. Philadelphia: Davis, F. A.; 1965. p. 291-317.
92. Cabannes R, Beurrier A, Larrouy G. [Thalassemia in the Indians of French Guiana]. *Nouv Rev Fr Hematol.* 1965; **5**(4): 617-29.
93. Cabannes R, Larrouy G, Fernet P, Sendrail A. Etude hemotypologique des populations sedentaires de la Saoura (Sahara occidental). II. Les hemoglobines. *Bull Mem Soc Anthropol Paris.* 1969; **12**(4): 139-42.
94. Cabannes R, Larrouy G, Sendrail A. Etude hemotypologique des populations du massif du Hoggar et du plateau de l'Air. III. Les hemoglobines. *Bull Mem Soc Anthropol Paris.* 1969; **12**(4): 143-6.
95. Cabannes R, Lefevre-Witier P, Sendrail A. III. Etude des hemoglobines dans les populations du Tassili N'Ajjer. *Bull Mem Soc Anthropol Paris.* 1967; **12**(1): 434-9.
96. Cabannes R, Nicolas C, Clerc M, Rives P, Seguin G, Cierea P, et al. Etude hemotypologique des Koulango-de Cote-d'Ivoire. *Ann Univ Abidjan Fac Ned.* 1975; **9**: 16-32.
97. Cabannes R, Nicolas C, Houvet D, Fellenz C, Sangare A. Etude hemotypologique et biologique des Abrons et des metis Koulango-abron. *Ann Univ Abidjan Fac Ned.* 1978; **12**: 119-41.
98. Cabannes R, Schmidt-Beurrier A. Recherches sur les haemoglobines des populations indiennes de l'Amerique de Sud. *L'Anthropologie.* 1966; **70**: 331-4.
99. Cabannes R, Schmidt-Beurrier A, Monnet B. Etude des protéines, des haptoglobines, des transferrines et des hémoglobines d'une population noire de Guyane française (Boni). *Bull Soc Pathol Exot Filiales.* 1966; **59**: 908-16.
100. Cabannes R, Sy B, Martineaud M, Boissezon J, Blanc M, Clerc M, et al. Etude hemotypologique et biologique des Attie du village d'Atiekwa. *Medecine d'Afrique Noire.* 1970; **17**: 835-41.
101. Cabannes R, Sy B, Schmidt-Beurrier A. [Study of hemoglobinoses in the Niamey region (Middle Niger)]. *Nouv Rev Fr Hematol.* 1967; **7**(2): 309-13.
102. Cabannes R, Sy B, Schmidt-Beurrier A. Etudes des haemoglobines en Cote d'Ivoire. *Medecine d'Afrique Noire.* 1967; **14**: 367-74.
103. Calis JC, Phiri KS, Faragher EB, Brabin BJ, Bates I, Cuevas LE, et al. Severe anemia in Malawian children. *The New England Journal of Medicine.* 2008; **358**(9): 888-99.
104. Calvo-Villas JM, Zapata Ramos MF, Cuesta Tovar J, de la Iglesia Inigo S, Ropero Gradilla P, Carreter de Granda E, et al. [Prevalence of hemoglobinopathies in pregnant women in the Lanzarote health sanitary area]. *An Med Interna.* 2006; **23**(5): 206-12.
105. Campos LMFR, Dias FL, Mendes M. Abnormal hemoglobins in umbilical cord blood. *Revista Brasileira de Hematologia e Hemoterapia.* 2006; **28**(1): 67-9.
106. Cao A, Congiu R, Sollaino MC, Desogus MF, Demartis FR, Loi D, et al. Thalassaemia and glucose-6-phosphate dehydrogenase screening in 13- to 14-year-old students of the Sardinian population: preliminary findings. *Community Genet.* 2008; **11**(3): 121-8.
107. Cao A, Galanello R, Furbetta M, Muroli PP, Garbato L, Rosatelli C, et al. Thalassaemia types and their incidence in Sardinia. *J Med Genet.* 1978; **15**(6): 443-7.
108. Carnevale P, Bosseno MF, Lallemand M, Feingold J, Lissouba P, Molinier M, et al. [*Plasmodium falciparum* malaria and sickle cell gene in the popular Republic of Congo. I. Relationship between parasitemia and sickle cell trait in Djoumouna (region of Brazzaville) (author's transl)]. *Ann Genet.* 1981; **24**(2): 100-4.
109. Cezar PC, Mizusaki K, Pinto W, Jr., Opromolla DW, Beiguelman B. [S hemoglobin and leprosy (author's transl)]. *Rev Bras Pesqui Med Biol.* 1974; **7**(2): 151-67.
110. Chabeuf M, Zeldine G. Groupes sanguins et drepanocytose dans l'ile de Sainte Marie (Madagascar). *Med Trop (Mars).* 1962; **22**: 261-7.
111. Char KS, Rao PR. Occurrence of hemoglobin D Los Angeles in Brahmins of Andhra Pradesh, South India. *Hemoglobin.* 1981; **5**(6): 609-11.
112. Chasen ST, Loeb-Zeitlin S, Landsberger EJ. Hemoglobinopathy screening in pregnancy: comparison of two protocols. *Am J Perinatol.* 1999; **16**(4): 175-80.



113. Chaudhuri S, Chakravartti MR, Mukhrejee B, Sen SN, Ghosh J, Maitra A. Study of haematological factors, blood groups, anthropometric measurements and genetics of some of the tribal and caste groups:1 South India - Keraia, Nilgiris, and Andhra Pradesh, 2. North Eastern India (Indo-Bhutan border). In: Totopara, editor. Proceedings of the 9th Congress of the International Society of Blood Transfusion; 1964; Mexico, 1962: Karger, S.; 1964. p. 196-205.
114. Chopra JG, Byam NT. Anemia survey in Trinidad and Tobago. *Am J Public Health Nations Health*. 1968; **58**(10): 1922-36.
115. Chopra JG, Mbaye AH. Sickling in Zanzibar Island - Its Incidence, regional variation, and relationship with splenomegaly rates. *Trans R Soc Trop Med Hyg*. 1969; **63**: 270-4.
116. Choremis C, Fessas P, Kattamis C, Stamatoyannopoulos G, Zannos-Mariolea L, Karaklis A, et al. Three inherited red-cell abnormalities in a district of Greece. Thalassaemia, sickling, and glucose-6-phosphate-dehydrogenase deficiency. *Lancet*. 1963; **1**: 907-9.
117. Choremis C, Zannos-Mariolea L, Katamis MD. Frequency of glucose-6-phosphate-dehydrogenase deficiency in certain highly malarious areas of Greece. *Lancet*. 1962; **1**: 17-8.
118. Choubisa SL, Choubisa L, Pande S, Srivastava YK. Incidence of abnormal haemoglobins and G-6-PD deficiency in school children of Udaipur (Rajasthan), India. *J Trop Med Hyg*. 1987; **90**(4): 215-6.
119. Clark TD, Greenhouse B, Njama-Meya D, Nzarubara B, Maiteki-Sebuguzi C, Staedke SG, et al. Factors determining the heterogeneity of malaria incidence in children in Kampala, Uganda. *J Infect Dis*. 2008; **198**(3): 393-400.
120. Colauto EM, Barraviera B, Meira DA, Matsubara LS, Pellegrino JJ, Machado PE, et al. [Malaria in the municipality of Humaita, State of Amazonas. XII - Incidence of erythrocyte resistance factors in the general population and in patients: hemoglobin S and Duffy blood system]. *Rev Inst Med Trop Sao Paulo*. 1981; **23**(5 Suppl 5): 72-8.
121. Colbourne MJ, Edington GM. Sickling and malaria in the Gold Coast. *Br Med J*. 1956; (4970): 784-6.
122. Colbourne MJ, Edington GM, Hughes MH, Ward-Brew A. A medical survey in a Gold Coast village. *Trans R Soc Trop Med Hyg*. 1950; **44**(3): 271-90.
123. Colombo B, Felicetti L. Admission of Hb S heterozygotes to a general hospital is relatively reduced in malarial areas. *J Med Genet*. 1985; **22**(4): 291-2.
124. Compri MB, Polimeno NC, Stella MB, Ramalho AS. [Public health programs for hereditary hemoglobinopathies in high school students in Brazil]. *Rev Saude Publica*. 1996; **30**(2): 187-95.
125. Cook JA, Kellermeyer WF, Jr., Warren KS, Kellermeyer RW. Sickle cell haemoglobinopathy and Schistosoma mansoni infection. *Ann Trop Med Parasitol*. 1972; **66**(2): 197-202.
126. Cresta M. [Morphological and Serological Anthropometry of the N'zakaras of the Republic of Central Africa.]. *La Ricerca Scientifica 2 ser, pt 2: Rendiconti Sezione B: Biologica*. 1964; **14**: 131-42.
127. Cresta M, Avoundogba N. [Risultati dello studio longitudinale dalla nascita a 5 anni in un gruppo di bambini di Porto Novo (Repubblica Popolare del Benin)]. *Rivista di Antropologia*. 1980; **61**: 43-132.
128. Cresta M, Spedini G, Dlivieri V. [Antropologia morfologica ed ematologica del basso Dahomey. Nota III-Emazie. emoglobine, caratteri chimici]. *Rivista di Antropologia*. 1968; **55**: 189-202.
129. Crompton PD, Traore B, Kayentao K, Doumbo S, Ongoiba A, Diakite SA, et al. Sickle cell trait is associated with a delayed onset of malaria: implications for time-to-event analysis in clinical studies of malaria. *J Infect Dis*. 2008; **198**(9): 1265-75.
130. Currat M, Trabuchet G, Rees D, Perrin P, Harding RM, Clegg JB, et al. Molecular analysis of the beta-globin gene cluster in the Niokholo Mandenka population reveals a recent origin of the beta(S) Senegal mutation. *Am J Hum Genet*. 2002; **70**(1): 207-23.
131. Das SR, Mukherjee CP, B. SD. Sickle-cell trait in Koraput District and other parts of India. *Acta Genet Stat Med*. 1967; **17**: 62-73.
132. Daudt LE, Zechmaister D, Portal L, Neto EC, Silla LM, Giugliani R. [Neonatal screening for hemoglobinopathies: a pilot study in Porto Alegre, Rio Grande do Sul, Brazil]. *Cad Saude Publica*. 2002; **18**(3): 833-41.
133. David S, Trincao C. [Drepanocytomia, Erythrocytic Glucose-6-Phosphate Dehydrogenase Deficiency (G-6-Pd) and Malaria in the Cuango Post (Lunda-Angola)]. *An Inst Med Trop (Lisb)*. 1963; **20**: 5-15.

134. de Araujo MC, Serafim ES, de Castro Jr WA, de Medeiros TM. [Prevalence of abnormal hemoglobins in newborns in Natal, Rio Grande do Norte, Brazil]. *Cad Saude Publica*. 2004; **20**(1): 123-8.
135. De Bernal M, Collazos A, Bonilla RD, Tascon EP. Determination of the prevalence of hemoglobin S, C, D, and G in neonates from Buenaventura, Colombia. *Colomb Medica*. 2010; **41**(2): 141-7.
136. de Pinango CLA, Arends T. Abnormal haemoglobins in native blood donors of Bolivar State. *Acta Cient Venez*. 1965; **16**: 215-8.
137. de Souza RAV, Pratesi R, Fonseca SF. Neonatal screening program for hemoglobinopathies in dourados, MS-an analysis. Programa de triagem neonatal para hemoglobinopatias em dourados, MS-uma análise. 2010; **32**(2): 126-30.
138. Delbrouck J. [The genetics of sickle cell anemia; maintenance of an elevated incidence of sickle cell anemia in the Belgian Congo.]. *Ann Soc Belg Med Trop*. 1958; **38**(2): 103-34.
139. Deliyannis GA, Tavlarakis N. Sickling phenomenon in Northern Greece. *Br Med J*. 1955; **2**(4934): 299-301.
140. Deloron P, Ringwald P, Luty AJF, Renaut A, Minh TN, Mbessy JR, et al. Relationships between malaria prevalence and malaria-related morbidity in school children from two villages in central Africa. *Am J Trop Med Hyg*. 1999; **61**(1): 99-102.
141. Destro-Bisol G, Spedini G. Anthropological survey on red cell glutathione peroxidase (GPX1) polymorphism in central western Africa: a tentative hypothesis on the interaction between GPX1\*2 and Hb beta \*S allelic products. *Am J Phys Anthropol*. 1989; **79**(2): 217-24.
142. Devoucoux R, Hurpin C, Baudon D, Molez JF, Roux JF, Guilloud-Bataille M, et al. Population genetics of abnormal haemoglobins in Burkina Faso, west Africa. *Ann Hum Biol*. 1991; **18**(4): 295-302.
143. Dewi M. 2011.
144. Dey A, Sahu PN. Distribution of HbS gene and variability of the index of the opportunity for natural selection in a caste population of Western Orissa, India. *Anthropological Science*. 1996; **104**(2): 99-106.
145. Deyde VM, Lo BB, Khalifa IO, Ly B, Ball A, Fattoum S. Epidemiological profile of hemoglobinopathies in the Mauritanian population. *Ann Hematol*. 2002; **81**(6): 320-1.
146. Didier R, Diacono G. Enquête sur la sicklémie en Tunisie. *Arch Inst Pasteur Tunis*. 1956; **33**: 61-4.
147. Dreyfus F, Benyesch M. Sickle-cell trait in Arabs. *Lancet*. 1952; **1**: 1213.
148. Dufrenot, Legait JP. [Distribution of hemoglobin S and C genes in Upper Volta, Mali and Niger]. *Bull Soc Pathol Exot Filiales*. 1970; **63**(5): 606-14.
149. Dulin-Iniguez E. [Newborn screening for sickle cell anemia]. *Med Clin (Barc)*. 2006; **126**(8): 293-4.
150. Edington GM. Some observations on the abnormal haemoglobin disease in Ghana. In: Jonxis JHP, Delafresnaye JF, editors. *CIOMS Symposium on Abnormal Haemoglobins*: Blackwell Scientific Publications; 1959. p. 290-9.
151. Edington GM, Laing WN. Relationship between haemoglobins C and S and malaria in Ghana. *Br Med J*. 1957; **2**(5037): 143-5.
152. el-Hazmi MA, al-Swailem A, Warsy AS. Glucose-6-phosphate dehydrogenase deficiency and sickle cell genes in Bisha. *J Trop Pediatr*. 1995; **41**(4): 225-9.
153. el-Hazmi MA, Warsy AS. Interaction between glucose-6-phosphate dehydrogenase deficiency and sickle cell gene in Saudi Arabia. *Trop Geogr Med*. 1987; **39**(1): 32-5.
154. Elhazmi MAF, Warsy AS. The Frequency of Hbs and Glucose-6-Phosphate-Dehydrogenase Phenotypes in Relation to Malaria in Western Saudi-Arabia. *Saudi Med J*. 1993; **14**(2): 121-5.
155. Enevold A, Alifrangis M, Sanchez JJ, Carneiro I, Roper C, Borsting C, et al. Associations between alpha+-thalassemia and *Plasmodium falciparum* malarial infection in northeastern Tanzania. *J Infect Dis*. 2007; **196**(3): 451-9.
156. Etcheverry R, Guzman C, Hille A, Nagel R, Covarrubias E, Regonesi C, et al. [Investigation of blood groups and other genetic characteristics in Chilean natives. I. In Atacamenos and Mapuches]. *Rev Med Chil*. 1967; **95**(10): 599-604.
157. Evans DI, Blair VM. Neonatal screening for haemoglobinopathy. Results in 7691 Manchester newborns. *Arch Dis Child*. 1976; **51**(2): 127-30.

158. Ewing N, Powars D, Hilburn J, Schroeder WA. Newborn diagnosis of abnormal hemoglobins from a large municipal hospital in Los Angeles. *Am J Public Health*. 1981; **71**(6): 629-31.
159. Ezeilo GC. Sickle-cell trait frequency in Zambia. *Trop Geogr Med*. 1970; **22**(2): 189-97.
160. Farzana F, Zuberi SJ, Hashmi JA. Prevalence of abnormal hemoglobin and thalassemia trait in a group of professional blood donors and hospital staff in Karachi. *J Pak Med Assoc*. 1975; **25**(9): 237-9.
161. Fattoum S. [Hemoglobinopathies in Tunisia. An updated review of the epidemiologic and molecular data]. *Tunis Med*. 2006; **84**(11): 687-96.
162. Firschein IL. Population dynamics of the sickle-cell trait in the Black Caribs of British Honduras, Central America. *Am J Hum Genet*. 1961; **13**: 233-54.
163. Fleming AF, Storey J, Molineaux L, Iroko EA, Attai ED. Abnormal haemoglobins in the Sudan savanna of Nigeria. I. Prevalence of haemoglobins and relationships between sickle cell trait, malaria and survival. *Ann Trop Med Parasitol*. 1979; **73**(2): 161-72.
164. Foster K, Forbes M, Hayes R, Serjeant GR. Cord blood screening for sickle hemoglobin: evidence against a female preponderance of hemoglobin S. *J Pediatr*. 1981; **98**(1): 79-81.
165. Fourquet R. [Hemotypological study of the Issa and Gadaboursi Somalis]. *Médecine Tropicale : Revue du Corps de Santé Colonial*. 1970; **30**(3): 353-62.
166. Fowkes FJ, Imrie H, Migot-Nabias F, Michon P, Justice A, Deloron P, et al. Association of haptoglobin levels with age, parasite density, and haptoglobin genotype in a malaria-endemic area of Gabon. *Am J Trop Med Hyg*. 2006; **74**(1): 26-30.
167. Foy H, Kondi A, Rebello A, Martins F. The distribution of sickle cell trait and the incidence of sickle cell anaemia in the Negro tribes of Portuguese East Africa. *East Afr Med J*. 1952; **29**(7): 247-51.
168. Foy H, Kondi A, Timms GL, Brass W, Bushra F. The variability of sickle-cell rates in tribes of Kenya and the Southern Sudan. *Br Med J*. 1964; **1**: 294-7.
169. Fraser GR, Stamatoyannopoulos G, Kattamis C, Loukopoulos D, Defaranas B, Kitsos C, et al. Thalassemias, Abnormal Hemoglobins and Glucose-6-Phosphate Dehydrogenase Deficiency in the Arta Area of Greece: Diagnostic and Genetic Aspects of Complete Village Studies. *Ann N Y Acad Sci*. 1964; **119**: 415-35.
170. Fujiki N, Ohkawara Y, Yamamoto M, Fukuda K, Nishimura J, Takenaka S, et al. Hematological survey in the isolated villages in Japan. *Isr J Med Sci*. 1965; **1**(4): 712-3.
171. Galacteros F. [Neonatal detection of sickle cell disease in metropolitan France. Association française pour le dépistage et la prévention des handicaps de l'enfant (AFDPHE)]. *Arch Pediatr*. 1996; **3**(10): 1026-31.
172. Gali AE, Polat G, Dogdu O, Akgol M, Parlak HR, Arpacı A, et al. A premarital screening programme of hemoglobinopathies in Hatay. *Annals of Medical Sciences*. 1999; **8**(2): 88-92.
173. Gamet A. Première étude sur les hémoglobinoses au centre-Cameroun. *Bull Soc Pathol Exot Filiales*. 1964; **57**: 1125-33.
174. Gelpi AP. Glucose-6-phosphate dehydrogenase deficiency, the sickling trait, and malaria in Saudi Arab children. *J Pediatr*. 1967; **71**(1): 138-46.
175. Gentilini M, Laroche V, Degremont A. [Aspects of Parasitic and Infectious Tropical Pathology in the Republic of Haiti.]. *Bull Soc Pathol Exot Filiales*. 1964; **57**: 565-70.
176. Gentilini M, M'Bengue JL, Danis M, Richard-Lenoble D. [Results of the electrophoretic study of hemoglobin in 500 Cameroonds of the Foubot region (East Cameroon)]. *Médecine Tropicale : Revue du Corps de Santé Colonial*. 1972; **32**(5): 579-85.
177. George E, Khuziah R. Malays with thalassaemia in West Malaysia. *Trop Geogr Med*. 1984; **36**(2): 123-5.
178. Ghatge SG, Pradhan PK, Agarwal S. Haemoglobin-S in Kurmi community of Madhya Pradesh--a preliminary report. *Indian J Med Res*. 1977; **66**(2): 260-4.
179. Ghosh K, Mukherjee MB, Surve RR, Shankarkumar U, Kate SL, Nagtilak SB, et al. Splenomegaly in school children in a remote tribal area of Dhule district, Maharashtra. *Indian J Malariol*. 2000; **37**(3-4): 68-73.
180. Giordano PC, Plancke A, Van Meir CA, Janssen CA, Kok PJ, Van Rooijen-Nijdam IH, et al. Carrier diagnostics and prevention of hemoglobinopathies in early pregnancy in The Netherlands: a pilot study. *Prenat Diagn*. 2006; **26**(8): 719-24.

181. Giri AK, Datta S, Gajra B, Roychaudhury A, Datta S, Talukder G, et al. Some genetic markers in tribals of Eastern India. *Acta Anthropogenet.* 1982; **6**(2): 99-106.
182. Godber M, Kopec AC, Mourant AE, Teesdale P, Tills D, Weiner JS, et al. The blood groups, serum groups, red-cell isoenzymes and haemoglobins of the Sandawe and Nyaturu of Tanzania. *Ann Hum Biol.* 1976; **3**(5): 463-73.
183. Goedde HW, Benkmann HG, Agarwal DP, Hirth L, Bienzle U, Dietrich M, et al. Genetic studies in Saudi Arabia: red cell enzyme, haemoglobin and serum protein polymorphisms. *Am J Phys Anthropol.* 1979; **50**(2): 271-7.
184. Gouagna LC, Bancone G, Yao F, Yameogo B, Dabire KR, Costantini C, et al. Genetic variation in human HBB is associated with *Plasmodium falciparum* transmission. *Nat Genet.* 2010; **42**(4): 328-31.
185. Goud JD, Rao PR. Genetic distances among the five tribal populations of Andhra, Pradesh, South India. *Anthropologischer Anzeiger; Bericht uber die biologisch-anthropologische Literatur.* 1979; **37**(1): 1-9.
186. Gozal D, Lorey FW, Chandler D, Derry MK, Lisbin A, Keens TG, et al. Incidence of sudden infant death syndrome in infants with sickle cell trait. *J Pediatr.* 1994; **124**(2): 211-4.
187. Greengross P, Hickman M, Gill M, Dugan B, Davies SC. Outcomes of universal antenatal screening for haemoglobinopathies. *J Med Screen.* 1999; **6**(1): 3-10.
188. Greenwood BM, Bradley AK, Blakebrough IS, Whittle HC, Marshall TF, Gilles HM. The immune response to a meningococcal polysaccharide vaccine in an African village. *Trans R Soc Trop Med Hyg.* 1980; **74**(3): 340-6.
189. Griffiths SB. Absence of the sickle cell trait in the Bushmen of South-West Africa. *Nature.* 1953; **171**(4352): 577-8.
190. Griffiths SB. The distribution of the sickle-cell trait in Africa. *S Afr J Med Sci.* 1954; **19**: 56-7.
191. Gulbis B, Cotton F, Ferster A, Ketelslegers O, Dresse MF, Ronge-Collard E, et al. Neonatal haemoglobinopathy screening in Belgium. *J Clin Pathol.* 2009; **62**(1): 49-52.
192. Guler E, Karacan M. Prevalence of beta-thalassemia and sickle cell anemia trait in premarital screening in Konya urban area, Turkey. *J Pediatr Hematol Oncol.* 2007; **29**(11): 783-5.
193. Haj Khelil A, Laradi S, Miled A, Omar Tadmouri G, Ben Chibani J, Perrin P. Clinical and molecular aspects of haemoglobinopathies in Tunisia. *Clin Chim Acta.* 2004; **340**(1-2): 127-37.
194. Halberstein RA, Davies JE, Mack AK. Hemoglobin variations on a small Bahamian island. *Am J Phys Anthropol.* 1981; **55**(2): 217-21.
195. Hamza S, Kamel K, Moafy N, Ibrahim WN, Selim O, Azim A, et al. Hereditary blood factors of North Sinai inhabitants. *Human biology; an international record of research.* 1976; **48**(1): 193-202.
196. Harley JD, Agar NS, Turner TB. Letter: sickle-cell anaemia and trait in Sydney. *The Medical journal of Australia.* 1976; **1**(23): 894.
197. Hassan MK, Taha JY, Al-Naama LM, Widad NM, Jasim SN. Frequency of haemoglobinopathies and glucose-6-phosphate dehydrogenase deficiency in Basra. *East Mediterr Health J.* 2003; **9**(1-2): 45-54.
198. Heijboer H, Van Den Tweel XW, Peters M, Knuist M, Prins J, Heymans BSA. [One year of neonatal screening for sickle cell disease in the emma kinderziekenhuis/academisch medisch centrum, Amsterdam]. *Ned Tijdschr Geneesk.* 2001; **145**(37): 1795-9.
199. Henthorn J, Anionwu E, Brozovic M. Screening cord blood for sickle haemoglobinopathies in Brent. *British Medical Journal (Clinical research ed).* 1984; **289**(6443): 479-80.
200. Herzog P, Bohatova J, Drdova A. Genetic polymorphisms in Kenya. *Am J Hum Genet.* 1970; **22**(3): 287-91.
201. Hewitt R, Krause A, Goldman A, Campbell G, Jenkins T. Beta-globin haplotype analysis suggests that a major source of Malagasy ancestry is derived from Bantu-speaking Negroids. *Am J Hum Genet.* 1996; **58**(6): 1303-8.
202. Hiernaux J. Blood polymorphism frequencies in the Sara Majingay of Chad. *Ann Hum Biol.* 1976; **3**(2): 127-40.
203. Horsfall WR, Lehman H. Absence of the sickle cell trait in seventy-two Australian aboriginals. *Nature.* 1953; **172**(4379): 638.

204. Horsfall WR, Lehmann H. Absence of abnormal haemoglobins in some Australian aboriginals. *Nature*. 1956; **177**(4497): 41-2.
205. Ibarra B, Vaca G, Franco-Gamboa E, Garcia-Cruz D, de la Mora E, Castro-Felix LP, et al. Abnormal hemoglobins in Northwestern Mexico. *Acta Anthropogenet*. 1982; **6**(4): 217-23.
206. Ibrahim WN, Kamel K, Selim O, Azim A, Gaballah MF, Sabry F, et al. Hereditary blood factors and anthropometry of the inhabitants of the Egyptian Siwa Oasis. *Human biology; an international record of research*. 1974; **46**(1): 57-68.
207. Idowu OA, Mafiana CF, Dapo S. Anaemia in pregnancy: a survey of pregnant women in Abeokuta, Nigeria. *Afr Health Sci*. 2005; **5**(4): 295-9.
208. Iyer SR, Iyer RR, Oza GD, Rane RM, Khandwala RM, Desai PK, et al. Sick cell syndromes in and around Bardoli. *J Assoc Physicians India*. 1994; **42**(11): 885-7.
209. Jacob GF. A study of the survival rate of cases of sickle-cell anaemia. *Br Med J*. 1957; **1**(5021): 738-9.
210. Jain AP, Khan N, Gupta OP. A survey of glucose-6-phosphate dehydrogenase deficiency and some of its correlates in a Maharashtra village. *J Indian Med Assoc*. 1981; **76**(1-2): 1-3.
211. Jain RC. Sickle cell and thalassaemic genes in Libya. *Trans R Soc Trop Med Hyg*. 1985; **79**(1): 132-3.
212. Jain RC, Mehta J, Mehta NL, Joshi KC, Gupta OP, Andrew AM. Sickle cell trait, thalassaemia and glucose-6-phosphate dehydrogenase deficiency in the Bhil tribe of southern Rajasthan. *Indian J Med Res*. 1981; **73**: 548-53.
213. Jelliffe DB, Bennett FJ, Stroud CE, Novotny ME, Karrach HA, Musoke LK, et al. Field survey of the health of Bachiga children in the Kayonza district of Kigezi. Uganda. *Am J Trop Med Hyg*. 1961; **10**: 435-45.
214. Jelliffe DB, Bennett FJ, Stroud CE, Welbourn HF, Williams MC, Jelliffe EF. The Health of Acholi Children. (with Special Reference to Congenital Abnormalities Following an Epidemic of "O'nyong-Nyong"). *Trop Geogr Med*. 1963; **15**: 411-21.
215. Jelliffe DB, Bennett FJ, White RH, Cullinan TR, Jelliffe EF. The children of the Lugbara. A study in the techniques of paediatric field survey in tropical Africa. *Trop Geogr Med*. 1962; **14**: 33-50.
216. Jelliffe DB, Stuart KL, Wills VG. The sickle cell trait in Jamaica. *Blood*. 1954; **9**(2): 144-52.
217. Jenkins T. Sickle Cell Anaemia in Wankie, Southern Rhodesia. *Cent Afr J Med*. 1963; **40**: 307-19.
218. Jenkins T, Blecher SR, Smith AN, Anderson CG. Some hereditary red-cell traits in Kalahari Bushmen and Bantu: hemoglobins, glucose-6-phosphate dehydrogenase deficiency, and blood groups. *Am J Hum Genet*. 1968; **20**(4): 299-309.
219. Jeremiah ZA. Abnormal haemoglobin variants, ABO and Rh blood groups among student of African descent in Port Harcourt, Nigeria. *Afr Health Sci*. 2006; **6**(3): 177-81.
220. Joyanes B, Moro M, Roperio P, Briceno O, Dulin E, Villegas A. [Screening of hemoglobinopathies in a cohort of newborns in Madrid]. *Med Clin (Barc)*. 2006; **126**(8): 290-2.
221. Junien C, Chaventre A, Fofana Y, Lapoumeroulie C, Floury B, Duflo B, et al. Glucose-6-phosphate dehydrogenase and hemoglobin variants in Kel Kummer Tuareg and related groups. Indirect evidence for alpha-thalassemia trait. *Hum Hered*. 1982; **32**(5): 318-28.
222. Kadkhodaei Elyaderani M, Cinkotai KI, Hyde K, Waters HM, Howarth J, Goldstone S, et al. Ethnicity study and non-selective screening for haemoglobinopathies in the antenatal population of central Manchester. *Clin Lab Haematol*. 1998; **20**(4): 207-11.
223. Kaine WN, Udeozo I. Incidence of sickle cell trait and anemia in Ibo, preschool children Nigerian *Journal of Paediatrics*. 1981; **8**: 87-9.
224. Kalmus H. Defective colour vision, P.T.C. tasting and drepanocytosis in samples from fifteen Brazilian populations. *Ann Hum Genet*. 1957; **21**(4): 313-7.
225. Kamel K, Chandy R, Mousa H, Yunis D. Blood groups and types, hemoglobin variants, and G-6-PD deficiency among Abu Dhabians in the United Arab Emirates. *Am J Phys Anthropol*. 1980; **52**(4): 481-4.
226. Kamel K, Umar M, Ibrahim W, Mansour A, Gaballah F, Selim O, et al. Anthropological studies among Libyans. Erythrocyte genetic factors, serum haptoglobin phenotypes and anthropometry. *Am J Phys Anthropol*. 1975; **43**(1): 103-11.

227. Kaptue-Noche L, Mbantenkhu JF, Nsangow JFI. Geographic distribution of human hemoglobins and thalassemia in Cameroon, Middle and East Africa. In: Bowman JE, editor. *Distribution and Evolution of the Haemoglobin and Globin Loci*. New York: Elsevier; 1983. p. 159-66.
228. Kar BC. Sickle cell disease in India. *J Assoc Physicians India*. 1991; **39**(12): 954-60.
229. Kate SL, Mukherjee BN, Malhotra KC, Phadke MA, Mutalik GS, Sainani GS. Red cell glucose-6-phosphate dehydrogenase deficiency and haemoglobin variants among ten endogamous groups of Maharashtra and West Bengal. *Hum Genet*. 1978; **44**(3): 339-43.
230. Kaufman M, Steier W, Applewhaite F, Ruggiero S, Ginsberg V. Sickle-Cell Trait in Blood Donors. *Am J Med Sci*. 1965; **249**: 56-61.
231. Keskin A, Turk T, Polat A, Koyuncu H, Saracoglu B. Premarital screening of beta-thalassemia trait in the province of Denizli, Turkey. *Acta Haematol*. 2000; **104**(1): 31-3.
232. Kifude C, Waitumbi J. Sickle cell and alpha thalassemia in children participating in a malaria vaccine clinical trial in Kisumu, Kenya. *International Journal of Laboratory Hematology*. 2007; **29**: 107-.
233. Kirk RL, Lai LY, Vos GH, Vidyarthi LP. A genetical study of the Oraons of the Chota Nagpur Plateau (Bihar, India). *Am J Phys Anthropol*. 1962; **20**: 375-85.
234. Kirk RL, Lai LY, Vos GH, Wickremasinghe RL, Perera DJ. The blood and serum groups of selected populations in South India and Ceylon. *Am J Phys Anthropol*. 1962; **20**: 485-79.
235. Kobbe R, Kreuzberg C, Adjei S, Thompson B, Langefeld I, Thompson PA, et al. A randomized controlled trial of extended intermittent preventive antimalarial treatment in infants. *Clinical infectious diseases : an official publication of the Infectious Diseases Society of America*. 2007; **45**(1): 16-25.
236. Kofi Ekue JM, Wurapa FK, Rwabwogo-Atenyi J. Haemoglobin genotypes, glucose - 6 - phosphate dehydrogenase deficiency and bronchial asthma. *East Afr Med J*. 1983; **60**(10): 676-8.
237. Konate L, Zwetyenga J, Rogier C, Bischoff E, Fontenille D, Tall A, et al. The epidemiology of multiple *Plasmodium falciparum* infections - 5. Variation of *Plasmodium falciparum* msp1 block 2 and msp2 allele prevalence and of infection complexity in two neighbouring Senegalese villages with different transmission conditions. *Trans R Soc Trop Med Hyg*. 1999; **93**: S21-S8.
238. Kreuels B, Kobbe R, Adjei S, Kreuzberg C, von Reden C, Bater K, et al. Spatial variation of malaria incidence in young children from a geographically homogeneous area with high endemicity. *J Infect Dis*. 2008; **197**(1): 85-93.
239. Kulkarni AG, Jekeme SD. Cord blood screening for haemoglobinopathies in northern Nigeria. *Ann Trop Med Parasitol*. 1986; **80**(5): 549-51.
240. Kumar N, Ghosh AK. ABO blood groups and sickle-cell trait investigations in Madhya Pradesh, Ujjain and Dewas Districts. *Acta Genet Stat Med*. 1967; **17**: 55-61.
241. Kumar N, Mukherjee DP. Genetic distances among the Ho tribe and other groups of Central Indians. *Am J Phys Anthropol*. 1975; **42**: 489-94.
242. Labie D, Richin C, Pagnier J, Gentilini M, Nagel RL. Hemoglobins S and C in Upper Volta. *Hum Genet*. 1984; **65**(3): 300-2.
243. Lallemand M, Galacteros F, Lallemand-Lecoeur S, Feingold J, Carnevale P, Boukila V, et al. Hemoglobin abnormalities. An evaluation on new-born infants and their mothers in a maternity unit close to Brazzaville (P.R. Congo). *Hum Genet*. 1986; **74**(1): 54-8.
244. Languillon J, Delas A. Not Available. *Médecine Tropicale : Revue du Corps de Santé Colonial*. 1957; **17**(6): 830-5.
245. Languillon J, Linhard J, Diebolt G. [Blood groups: abnormal hemoglobins and leprosy]. *Bull Soc Med Afr Noire Lang Fr*. 1971; **16**(4): 581-4.
246. Lauder JR, Ibrahim SA. Sickling in south-west Kordofan. *Sud Med J*. 1970; **8**: 207-14.
247. Laurens A, Diakhate L, Blavy G, Diebolt G, Linhard J. [Drepanocytosis and genetics]. *Bull Soc Med Afr Noire Lang Fr*. 1978; **23**(4): 441-4.
248. Layrisse M, Layrisse Z, Wilbert J. Blood group antigens among the Paraujano. *Am J Phys Anthropol*. 1960; **18**: 131-9.

249. Le Gallais D, Lonsdorfer J, Fabritius H, Bogui P, Sangare A, Cabannes R. Prevalence of the sickle cell trait among students in a physical education college in Cote-d'Ivoire. *Nouv Rev Fr Hematol*. 1989; **31**(6): 409-12.
250. Le Hesran JY, Personne I, Personne P, Fievet N, Dubois B, Beyeme M, et al. Longitudinal study of *Plasmodium falciparum* infection and immune responses in infants with or without the sickle cell trait. *International Journal of Epidemiology*. 1999; **28**(4): 793-8.
251. Lefranc MP, Lefranc G, Farhat M, Jmour R, Boukef K, Beuzard Y, et al. Frequency of human A gamma 75Thr globin chain in a population from Tunisia. *Hum Genet*. 1981; **59**(1): 89-91.
252. Lehmann H. Distribution of the Sickle cell gene. *Eugen Rev*. 1954; **46**: 101-21.
253. Lehmann H, Maranjian G, Mourant AE. Distribution of sickle-cell hemoglobin in Saudi Arabia. *Nature*. 1963; **198**: 492-3.
254. Lehmann H, Raper AB. Maintenance of high sickling rate in an African community. *Br Med J*. 1956; **2**(4988): 333-6.
255. Lelong M, Kaddari F, Hanichi A, Porte P. Interet du depistage neonatal systematique des hemoglobinopathies a l'Hopital des Saint-Denis (93). *Revue Francaise des Laboratoires*. 2001; **2001**(329): 19-21.
256. Liljestrand J, Bergstrom S, Birgegard G. Anaemia of pregnancy in Mozambique. *Trans R Soc Trop Med Hyg*. 1986; **80**(2): 249-55.
257. Lima AMMD, Azevedo E, Krieger H, Cabello PH, Pollitzer WS. Admixture and relationships of the population of Jacobina, Bahia, Brazil. *Am J Hum Biol*. 1996; **8**(4): 483-8.
258. Linhard J, Diebolt G, Baylet R, Diop S. [Diagnosis of hemoglobinopathies in 2 Serer populations]. *Bull Soc Med Afr Noire Lang Fr*. 1973; **18**(4): 587-9.
259. Lisker R, Cordova MS, Graciela Zarate QB. Studies on several genetic hematological traits of the Mexican population. XVI. Hemoglobin, S and glucose-6-phosphate dehydrogenase deficiency in the east coast. *Am J Phys Anthropol*. 1969; **30**(3): 349-54.
260. Lisker R, Loria A, Cordova MS. Studies on Several Genetic Hematological Traits of the Mexican Population. 8. Hemoglobin S, Glucose-6-Phosphate Dehydrogenase Deficiency, and Other Characteristics in a Malarial Region. *Am J Hum Genet*. 1965; **17**: 179-87.
261. Lisker R, Zarate G, Loria A. Studies on several genetic hematologic traits of Mexicans IX. Abnormal hemoglobins and erythrocytic glucose-6-phosphate dehydrogenase deficiency in several Indian tribes. *Blood*. 1966; **27**(6): 824-30.
262. Lorey FW, Arnopp J, Cunningham GC. Distribution of hemoglobinopathy variants by ethnicity in a multiethnic state. *Genet Epidemiology*. 1996; **13**(5): 501-12.
263. Magana MT, Ongay Z, Tagle J, Bentura G, Cobian JG, Perea FJ, et al. Analysis of betaS and betaA genes in a Mexican population with African roots. *Blood cells, molecules & diseases*. 2002; **28**(2): 121-6.
264. MalGEN. Data for Burkina Faso, Cameroon, Gambia, Ghana, Malawi and Tanzania. 2009.
265. Marsh K, Otoo L, Hayes RJ, Carson DC, Greenwood BM. Antibodies to blood stage antigens of *Plasmodium falciparum* in rural Gambians and their relation to protection against infection. *Trans R Soc Trop Med Hyg*. 1989; **83**(3): 293-303.
266. Marti HR, Schoepf K, Gsett OR. Frequency of hemoglobin S and glucose-6-phosphate dehydrogenase deficiency in Southern Tanzania. *Br Med J*. 1965; **1**: 1476-7.
267. Martinez G, Canizares ME. Genetic hemoglobin abnormalities in 2363 Cuban newborns. *Hum Genet*. 1982; **62**(3): 250-1.
268. Masmans TN, Garly ML, Lisse IM, Rodrigues A, Petersen PT, Birgens H. Inherited hemoglobin disorders in Guinea-Bissau, West Africa: a population study. *Hemoglobin*. 2006; **30**(3): 355-64.
269. Matson GA, Sutton HE, Swanson J, Robinson A. Distribution of hereditary blood groups among Indians in South America. II. In Peru. *Am J Phys Anthropol*. 1966; **24**(3): 325-49.
270. Matson GA, Sutton HE, Swanson J, Robinson AR. Distribution of haptoglobin, transferrin, and hemoglobin types among Indians of Middle America: in British Honduras, Costa Rica and Panama. *Am J Phys Anthropol*. 1965; **23**(2): 123-9.

271. Mauran-Sendrail A, Bouloux C, Gomila J, Langaney A. Comparative study of haemoglobin types of two populations of eastern Senegal--Bedik and Niokholonko. *Ann Hum Biol.* 1975; **2**(2): 129-36.
272. Medina JW, de Escobar DM, de Vizcaino MA, Sanchez OG, Ballas SK. Characteristics of a donor population in western Venezuela. *Transfusion (Paris).* 1987; **27**(6): 488-90.
273. Mendonçal AC, Garcia JL, Almeida CM, Megidi TBC, Fabron Júnior A. Muito além do "Teste do Pezinho". *Revista Brasileira de Hematologia e Hemoterapia.* 2009; **31**(2): 88-93.
274. Menendez C, Todd J, Alonso PL, Francis N, Lulat S, Ceesay S, et al. The response to iron supplementation of pregnant women with the haemoglobin genotype AA or AS. *Trans R Soc Trop Med Hyg.* 1995; **89**(3): 289-92.
275. Mercier J, Romana G, Le Correller Y. Prevalence de la drepanocytose en Guadeloupe. *Med Trop (Mars).* 1982; **42**: 611-5.
276. Merghoub T, Sanchez-Mazas A, Tamouza R, Lu CY, Bouzid K, Ardjoun FZ, et al. Haemoglobin D-Ouled Rabah among the Mozabites: a relevant variant to trace the origin of Berber-speaking populations. *Eur J Hum Genet.* 1997; **5**(6): 390-6.
277. Millan J, Dodin A. Premiers resultats d'une enquete hematologique sur la population comorienne de Moroni. *Ann Univ Madagascar Med.* 1965; **7**: 95-7.
278. Miller JM, Davis DC. Experience of a sickle cell screening program in Baltimore. *J Natl Med Assoc.* 1979; **71**(9): 839-41.
279. Mitchell R, Fupi F. Sickling in Tanzania. *East Afr Med J.* 1973; **49**: 638-42.
280. Mockenhaupt FP, Rong B, Gunther M, Beck S, Till H, Kohne E, et al. Anaemia in pregnant Ghanaian women: importance of malaria, iron deficiency, and haemoglobinopathies. *Trans R Soc Trop Med Hyg.* 2000; **94**(5): 477-83.
281. Modica R, Livadiotti M, Macaluso AS. Incidenza della sicklemlia progressa malaria a distribuzione razziale nell'gasi costiera di Tauorga. *Arch Ital Sci Med Trop Parassitol.* 1960; **41**: 595-604.
282. Modica RE, Flores JR. Sickle-cell haemoglobin in Equatorial Guinea. *Trans R Soc Trop Med Hyg.* 1970; **64**(5): 730-2.
283. Monekosso GL. Clinical Survey of a Yoruba Village. *The West African medical journal.* 1964; **13**: 47-59.
284. Monekosso GL, Ibiama AA. Splenogamy and sickle-cell trait in a malaria-endemic village. *Lancet.* 1966; **1**(1347-1348).
285. Monplaisir N, Casius de Linval JC, Sellaye M, Galacteros F, Braconnier F, Beuzard Y, et al. [Detection of haemoglobinopathies at birth, using isoelectric focalization (author's transl)]. *La Nouvelle presse medicale.* 1981; **10**(38): 3127-30.
286. Monteiro C, Rueff J, Falcao AB, Portugal S, Weatherall DJ, Kulozik AE. The frequency and origin of the sickle cell mutation in the district of Coruche/Portugal. *Hum Genet.* 1989; **82**(3): 255-8.
287. Moormann AM, Embury PE, Opondo J, Sumba OP, Ouma JH, Kazura JW, et al. Frequencies of sickle cell trait and glucose-6-phosphate dehydrogenase deficiency differ in highland and nearby lowland malaria-endemic areas of Kenya. *Trans R Soc Trop Med Hyg.* 2003; **97**(5): 513-4.
288. Moreno JL, Baribwira C. The Epidemiology of Neonatal Sickle-Cell-Anemia in Bujumbura (Burundi). *Ann Pediatr (Paris).* 1994; **41**(4): 215-8.
289. Motulsky AG, Vandepitte J, Fraser GR. Population genetic studies in the Congo. I. Glucose-6-phosphate dehydrogenase deficiency, hemoglobin S, and malaria. *Am J Hum Genet.* 1966; **18**(6): 514-37.
290. Mukherjee B, Kate SL, Bhanu BV, Kurian JC. Etude de douze marqueurs genetiques sanguins chez les Santals du Bengale occidental et les Madias de Maharashtra (Inde). *L'Anthropologie (Paris).* 1981; **85**: 119-24.
291. Mutesa L, Boemer F, Ngendahayo L, Rulisa S, Rusingiza EK, Cwinya-Ay N, et al. Neonatal screening for sickle cell disease in Central Africa: a study of 1825 newborns with a new enzyme-linked immunosorbent assay test. *J Med Screen.* 2007; **14**(3): 113-6.
292. Nasr A, Elghazali G, Giha H, Troye-Blomberg M, Berzins K. Interethnic differences in carriage of haemoglobin AS and Fcγ receptor IIa (CD32) genotypes in children living in eastern Sudan. *Acta Trop.* 2008; **105**(2): 191-5.



293. Nasserullah Z, Al Jame A, Abu Srair H, Al Qatari G, Al Naim S, Al Aqib A, et al. Neonatal screening for sickle cell disease, glucose-6-phosphate dehydrogenase deficiency and  $\alpha$ -thalassemia in Qatif and Al Hasa. *Ann Saudi Med.* 1998; **18**(4): 289-92.
294. Nasserullah Z, Alshammari A, Abbas MA, Abu-Khamseen Y, Qadri M, Jafer SA, et al. Regional experience with newborn screening for sickle cell disease, other hemoglobinopathies and G6PD deficiency. *Ann Saudi Med.* 2003; **23**(6): 354-7.
295. Nayudu NV. Field survey for sickle cell disease in the tribal population of East Godavari District, Andhra Pradesh. *J Assoc Physicians India.* 1990; **38**(7): 479-81.
296. Negi RS. The incidence of sickle-cell trait in two Bastar tribes. *Man.* 1962; **62**: 142.
297. Negi RS. The incidence of sickle-cell trait in Bastar. II. *Man.* 1963; **63**: 22.
298. Negi RS. The incidence of sickle-cell trait in Bastar. III. *Man.* 1964; **64**: 214.
299. Nguematcha R, Savina JF, Juhan I, Boche R, Ravisse P. Recherche de latare drepanocytaire dans un groupe Pygmee du Sud Cameroun. *Medecine d'Afrique Noire.* 1973; **20**: 605-6.
300. Nhonoli AM, Kujwalile JM, Kigoni EP, Masawe AE. Correlation of glucose-6-phosphate dehydrogenase (G-6-PD) deficiency and sickle cell trait (Hb-AS). *Trop Geogr Med.* 1978; **30**(1): 99-101.
301. Nieuwenhuis F, Wolf B, Bomba A, De Graaf P. Haematological study in Cabo Delgado province, Mozambique; sickle cell trait and G6PD deficiency. *Trop Geogr Med.* 1986; **38**(2): 183-7.
302. North ML, Piffaut MC, Duwig I, Locoh-Donou AG, Locoh-Donou AM. Detection of haemoglobinopathies at birth in Togo. *Nouv Rev Fr Hematol.* 1988; **30**(4): 237-41.
303. Ntoumi F, Mercereau-Puijalon O, Ossari S, Luty A, Reltien J, Georges A, et al. *Plasmodium falciparum*: sickle-cell trait is associated with higher prevalence of multiple infections in Gabonese children with asymptomatic infections. *Exp Parasitol.* 1997; **87**(1): 39-46.
304. Nurse GT, Jenkins T. Serogenetic studies on the Kavango peoples of South West Africa. *Ann Hum Biol.* 1977; **4**: 465-78.
305. Nurse GT, Jenkins T, David JH, Steinberg AG. The Njinga of Angola: a serogenetic study. *Ann Hum Biol.* 1979; **6**(4): 337-48.
306. Odunvbun ME, Okolo AA, Rahimy CM. Newborn screening for sickle cell disease in a Nigerian hospital. *Public Health.* 2008; **122**(10): 1111-6.
307. Ogala WN. Haematological values in healthy Nigerian infants. *Ann Trop Paediatr.* 1986; **6**(1): 63-6.
308. Ohene-Frempong K, Oduro J, Tetteh H, Nkrumah F. Screening newborns for sickle cell disease in Ghana. *Pediatrics.* 2008; **121**: S120-S1.
309. Omer A, Ali M, Omer AH, Mustafa MD, Satir AA, Samuel AP. Incidence of G-6-PD deficiency and abnormal haemoglobins in the indigenous and immigrant tribes of the Sudan. *Trop Geogr Med.* 1972; **24**(4): 401-5.
310. Omotade OO, Kayode CM, Falade SL, Ikpeme S, Adeyemo AA, Akinkugbe FM. Routine screening for sickle cell haemoglobinopathy by electrophoresis in an infant welfare clinic. *West Afr J Med.* 1998; **17**(2): 91-4.
311. Ondo A. [La drepanocytose au Gabon. Aspects epidemiologiques et preventifs]. *Clinical Respiratory Physiology.* 1983; **19**: 383.
312. Oomen JM, Meuwissen JH, Gemert W. Differences in blood status of three ethnic groups inhabiting the same locality in Northern Nigeria. Anaemia, splenomegaly and associated causes. *Trop Geogr Med.* 1979; **31**(4): 587-606.
313. Orbell SF, Bell RM. Sickle cell trait and intellectual ability. *Cent Afr J Med.* 1977; **23**(8): 179-82.
314. Ozsoylu S, Sahinoglu M. Haemoglobinopathy survey in an Eti-Turk village. *Hum Hered.* 1975; **25**(1): 50-9.
315. Pales L, Gallais P, Bert J, Fourquet R. La sicklémie (sickle cell trait) chez certaines populations nigero-tchadiennes de l'Afrique Occidentale française. *L'Anthropologie.* 1954; **58**: 472-80.
316. Pandey PL, Gupta RB, Tiwary RS. A Study of Sickle-Cell Hemoglobin and Glucose-6-Phosphate-Dehydrogenase Deficiency among the Tribals of Madhya-Pradesh. *Man in India.* 1992; **72**(4): 485-90.
317. Papiha SS. Haptoglobin and abnormal haemoglobin types in Sinhalese and Punjabis. *Hum Hered.* 1973; **23**(2): 147-53.

318. Parent J. Sickle cell anemia. *Ann Soc Belg Med Trop.* 1950; **30**(1): 47-52.
319. Parikh S, Dorsey G, Rosenthal PJ. Host polymorphisms and the incidence of malaria in Ugandan children. *Am J Trop Med Hyg.* 2004; **71**(6): 750-3.
320. Pegelow CH, Mack AK. Incidence of hemoglobins S and C in infants born in Miami to recent Haitian immigrants. *Trop Geogr Med.* 1989; **41**(4): 316-9.
321. Penaloza-Espinosa RI, Buentello-Malo L, Hernandez-Maya MA, Nieva-Garcia B, Lisker-Yurkowitzki R, Salamanca-Gomez F. [Hemoglobin S frequency in five Mexican populations and its importance in public health]. *Salud Publica Mex.* 2008; **50**(4): 325-9.
322. Peres MJ, Carreiro MH, Machado MC, Seixas T, Picanco I, Batalha L, et al. [Neonatal screening of hemoglobinopathies in a population residing in Portugal]. *Acta Med Port.* 1996; **9**(4-6): 135-9.
323. Perine PL, Michael MT. A preliminary survey for glucose-6-phosphate dehydrogenase deficiency and haemoglobin S in Ethiopia. *Ethiop Med J.* 1974; **12**(4): 179-84.
324. Perrine RP, John P, Pembrey M, Perrine S. Sickle cell disease in Saudi Arabs in early childhood. *Arch Dis Child.* 1981; **56**(3): 187-92.
325. Perutelli P, Scuderi F, Ragazzini G, Arigliani R, Bottini W, Mori PG. [Epidemiologic research for thalassemia and hemoglobinopathy traits in the territory of a local health unit in Liguria]. *La Pediatria Medica e Chirurgica.* 1988; **10**(1): 77-9.
326. Piliszek TS. Hb Bart's and its significance in the South African Negro. *Acta Haematol.* 1979; **61**(1): 33-8.
327. Pinheiro LS, Gonçalves RP, Sousa Tome CA, Evangelista Alcântara AE, Cintra Marques AR, Da Silva MM. The prevalence of hemoglobin S in newborns from Fortaleza, Brazil: The importance of neonatal research. *Revista Brasileira de Ginecologia e Obstetricia.* 2006; **28**(2): 122-5.
328. Plato CC, Rucknagel DL, Gershowitz H. Studies on the Distribution of Glucose-6-Phosphate Dehydrogenase Deficiency, Thalassemia, and Other Genetic Traits in the Coastal and Mountain Villages of Cyprus. *Am J Hum Genet.* 1964; **16**: 267-83.
329. Platt OS, Brambilla DJ, Rosse WF, Milner PF, Castro O, Steinberg MH, et al. Mortality In Sickle Cell Disease -- Life Expectancy and Risk Factors for Early Death. *New England Journal of Medicine.* 1994; **330**(23): 1639-44.
330. Poindexter HA. Epidemiological survey among the Gola tribe in Liberia. *Am J Trop Med Hyg.* 1953; **2**(1): 30-8.
331. Pollitzer WS, Chernoff AI, Horton LL, Froehlich M. Hemoglobin patterns in American Indians. *Science.* 1959; **129**(3343): 216.
332. Pollitzer WS, Namboodiri KK, Elston RC, Brown WH, Leyshon WC. The Seminole Indians of Oklahoma: morphology and serology. *Am J Phys Anthropol.* 1970; **33**(1): 15-29.
333. Pollitzer WS, Rucknagel D, Tashian R, Shreffler DC, Leyshon WC, Namboodiri K, et al. The Seminole Indians of Florida: morphology and serology. *Am J Phys Anthropol.* 1970; **32**(1): 65-81.
334. Polunin I, Sneath PHA. Studies of blood groups in South-East Asia. *Journal of the Royal Anthropological Institute of Britain and Ireland.* 1953; **83**: 215-51.
335. Raccurt CP, Seytor S, Saint-Martin C, Kernizan MS, Duverseau YT, Helmcke MS, et al. [Prevalence of abnormal hemoglobins in Haiti. Survey among a rural population of Plaine du Cul-de-Sac]. *Ann Soc Belg Med Trop.* 1983; **63**(3): 241-6.
336. Rachmilewitz EA, Tamari H, Liff F, Ueda Y, Nagel RL. The interaction of hemoglobin O Arab with Hb S and beta+ thalassemia among Israeli Arabs. *Hum Genet.* 1985; **70**(2): 119-25.
337. Rahbar S, Blume K. Hemoglobinopathies in the Los Angeles area. *Hemoglobin.* 1983; **7**(3): 291-5.
338. Rahgozar S, Poorfathollah AA, Moafi AR, Old JM. Beta s gene in Central Iran is in linkage disequilibrium with the Indian-Arab haplotype. *Am J Hematol.* 2000; **65**(3): 192-5.
339. Ramesh M, Balakrishna A, Veerraju P. Sickle cell haemoglobin and glucose-6-phosphate dehydrogenase deficiency among Dhobis of Visakhapatnam, Andhra Pradesh, India. *Anthropologischer Anzeiger; Bericht über die biologisch-anthropologische Literatur.* 1993; **51**(2): 173-7.

340. Ramesh M, Veerraju P. Sickle cell haemoglobin and glucose-6-phosphate dehydrogenase deficiency among Rellis of Visakhapatnam, Andhra Pradesh, South India. *Anthropologischer Anzeiger; Bericht uber die biologisch-anthropologische Literatur*. 1997; **55**(3-4): 289-93.
341. Rao PM, Blake NM, Veerraju P. Genetic studies on the Savara and Jatapu Tribes of Andhra Pradesh, India. *Hum Hered*. 1978; **28**(2): 122-31.
342. Rao PR, Goud JD. Sickle-cell haemoglobin and glucose-6-phosphate dehydrogenase deficiency in tribal populations of Andhra Pradesh. *Indian J Med Res*. 1979; **70**: 807-13.
343. Rao VR, Sathe MS, Gorakshakar AC, Vasantha K. Genetic heterogeneity and population structure of Gond-related tribes in the Vidarbha region of Maharashtra. *Hum Biol*. 1992; **64**(6): 903-17.
344. Ravisse P. Recherches sur la sicklémie chez les Pygmées de l'Afrique Equatoriale Française. *L'Anthropologie*. 1952; **56**: 491-3.
345. Reddy PH, Modell B. Reproductive behaviour and natural selection for the sickle gene in the Baiga tribe of central India: the role of social parenting. *Ann Hum Genet*. 1996; **60**(Pt 3): 231-6.
346. Reddy PH, Petrou M, Reddy PA, Tiwary RS, Modell B. Hereditary anaemias and iron deficiency in a tribal population (the Baiga) of central India. *Eur J Haematol*. 1995; **55**(2): 103-9.
347. Reyes Cruz G, Hernandez Acasiete M, Ruiz Reyes G. [Identification of a focus of beta-thalassemia in Tamiahua, Veracruz]. *Rev Invest Clin*. 1990; **42**(3): 189-92.
348. Reys L, Manso C, Stamatoyannopoulos G, Giblett E. Genetic studies on southeastern Bantu of Mozambique. II. Serum groups, hemoglobins and red cell isozyme phenotypes. *Humangenetik*. 1972; **16**(3): 227-33.
349. Rizzotti G. Falcemia c malattia falcemia. Prime osservazioni circa la loro diffusione nella regione di Addis Abeba. *Arch Ital Sci Med Trop Parassitol*. 1955; **36**: 555-63.
350. Roberts DF, Boyo AE. Abnormal haemoglobins in childhood among the Yorba. *Hum Biol*. 1962; **34**: 20-37.
351. Roberts DF, Lehmann H. A search for abnormal haemoglobins in some southern Sudanese peoples. *Br Med J*. 1955; **1**(4912): 519-21.
352. Roberts DF, Papiha SS. Les polymorphismes genetiques des Sukuma (Tanzania). *L'Anthropologie*. 1978; **82**: 565-74.
353. Ropero P, Molina L, Gonzalez FA, Villegas A. [Incidence of sickle cell disease in Equatorial Guinea.]. *Medicina clinica (Barcelona)*. 2009.
354. Rowley PT, Loader S, Sutera CJ, Walden M, Kozyra A. Prenatal screening for hemoglobinopathies. I. A prospective regional trial. *Am J Hum Genet*. 1991; **48**(3): 439-46.
355. Ruffie J, Lefevre-Witier P, Benabadji M, vergnes H, Marty Y, Blanc H, et al. Genetic markers of blood in some populations of North Sahara (1967). *Yearbook of Physical Anthropology* 1976. 1977; **20**: 181-202.
356. Sadek SH. Sickle cell trait in North Nigeria. *J Trop Med Hyg*. 1974; **77**(3): 61-4.
357. Saha N, Kirk RL, Shanbhag S, Joshi SH, Bhatia HM. Genetic studies among the Kadar of Kerala. *Hum Hered*. 1974; **24**(2): 198-218.
358. Saha N, Kirk RL, Shanbhag S, Joshi SR, Bhatia HM. Population genetic studies in kerala and the nilgiris (South West India). *Hum Hered*. 1976; **26**(3): 175-97.
359. Saha N, Patgunarajah N. Phenotypic and quantitative relationship of red cell acid phosphatase with haemoglobin, haptoglobin, and G6PD phenotypes. *J Med Genet*. 1981; **18**(4): 271-5.
360. Saha N, Tay J, Piplai C, Gupta R, Roy SK. Genetic studies among the sedentes and migrant Oraons of eastern India. *Am J Phys Anthropol*. 1988; **76**(3): 321-30.
361. Salazar Leite A, Jorge Janz G, Gandara AF. Relatorio da Missao do Instituto de Medicina Tropical a Angola (1954) Em colaboracao com a Missao de Prospeccao de endemias de Angola. *An Inst Med Trop (Lisb)*. 1954; **12**: 129-254.
362. Salzano FM. Incidence, effects, and management of sickle cell disease in Brazil. *Am J Pediatr Hematol Oncol*. 1985; **7**(3): 240-4.
363. Salzano FM, Tondo CV. Hemoglobin types of Brazilian Indians. *Am J Phys Anthropol*. 1968; **28**(3): 355-9.

364. Samuel AP, Saha N, Omer A, Hoffbrand AV. Quantitative expression of G6PD activity of different phenotypes of G6PD and haemoglobin in a Sudanese population. *Hum Hered.* 1981; **31**(2): 110-5.
365. Sansarricq H, Marill G, Portier A, Cabannes R. Les hemoglobinopathies en Haute Volta. *Sangre (Barc).* 1959; **30**: 503-11.
366. Santos David JH. *A Drepanocitomie e a Anthropologica.* Lisbon; 1960.
367. Santos-David J, Moura Pires F, Trincao C. Abnormal haemoglobins in the District of Lunda and the neighbouring District of Songo, Angola. *Man.* 1962; **62**: 48.
368. Saraswathy KN, Sachdeva MP. G6PD deficiency, sickle cell trait, haptoglobin and transferrin polymorphisms among Koyadoras and Nayakpods of Andhra Pradesh. *Anthropologist.* 2008; **10**(2): 163-5.
369. Sarr JB, Pelleau S, Toly C, Guitard J, Konate L, Deloron P, et al. Impact of red blood cell polymorphisms on the antibody response to *Plasmodium falciparum* in Senegal. *Microbes Infect.* 2006; **8**(5): 1260-8.
370. Saugrain J. [New research on drepanocytosis in Madagascar.]. *Bull Soc Pathol Exot Filiales.* 1957; **50**(3): 480-6.
371. Schedlbauer LM, Pass KA. Cellulose acetate/citrate agar electrophoresis of filter paper hemolysates from heel stick. *Pediatrics.* 1989; **83**(5 SUPPL.): 839-42.
372. Schiliro G, Di Gregorio F, Romeo MA, Testa R, Russo A. Incidence of hemoglobin S carriers in Sicily. *Hemoglobin.* 1986; **10**(1): 95-9.
373. Schuler L, Salzano FM, Franco MHL, de Melo e Freitas MJ, Mestriner MA, Simoes AL. Demographic and blood genetic characteristics in an Amazonian population. *J Hum Evol.* 1982; **11**: 549-58.
374. Segbena AY, Prehu C, Wajcman H, Bardakdjian-Michau J, Messie K, Feteke L, et al. Hemoglobins in Togolese newborns: Hb S, Hb C, Hb Bart's, and alpha-globin gene status. *Am J Hematol.* 1998; **59**(3): 208-13.
375. Selim O, Kamel K, Azim AA, Gaballah F, Sabry FH, Ibrahim W, et al. Genetic markers and anthropometry in the populations of the Egyptian oases of El-Kharga and El-Dakhla. *Hum Hered.* 1974; **24**(3): 259-72.
376. Sen R, Chakrabarti S, Sengupta B, De M, Haldar A, Poddar S, et al. Alpha-thalassemia among tribal populations of Eastern India. *Hemoglobin.* 2005; **29**(4): 277-80.
377. Sepha GC, Tiwari SK, Gupta GB, Mehta RS, Agarwal SD, Prasan NG. Problems of haemoglobin anomalies in Raipur (M.P.). *J Assoc Physicians India.* 1979; **27**(4): 291-7.
378. Shukla RN, Solanki BR. Sickle-cell trait in Central India. *Lancet.* 1958; **1**(7015): 297-8.
379. Silva Wdos S, Lastra A, de Oliveira SF, Klautau-Guimaraes N, Grisolia CK. [Evaluation of coverage by a neonatal screening program for hemoglobinopathies in the Reconcavo region of Bahia, Brazil]. *Cad Saude Publica.* 2006; **22**(12): 2561-6.
380. Silva Wdos S, Lastra A, de Oliveira SF, Klautau-Guimaraes N, Grisolia CK. [Evaluation of coverage by a neonatal screening program for hemoglobinopathies in the Reconcavo region of Bahia, Brazil]. *Cadernos de saude publica / Ministerio da Saude, Fundacao Oswaldo Cruz, Escola Nacional de Saude Publica.* 2006; **22**(12): 2561-6.
381. Simbeye AG. An analysis of some hemoglobin and haptoglobin phenotypes in Blantyre, Malawi. *Am J Hum Genet.* 1971; **23**(5): 510-2.
382. Simpoire J, Ilboudo D, Damintoti K, Sawadogo L, Maria E, Binet S, et al. Glucose-6-phosphate dehydrogenase deficiency and sickle cell disease in Burkina Faso. *Pakistan Journal of Biological Sciences.* 2007; **10**(3): 409-14.
383. Singer R, Budtz-Olsen OE, Brain P, Saugrain J. Physical features, sickling and serology of the Malagasy of Madagascar. *Am J Phys Anthropol.* 1957; **15**(1): 91-124.
384. Sokhna CS, Rogier C, Dieye A, Trape JF. Host factors affecting the delay of reappearance of *Plasmodium falciparum* after radical treatment among a semi-immune population exposed to intense perennial transmission. *Am J Trop Med Hyg.* 2000; **62**(2): 266-70.
385. Sommer CK, Goldbeck AS, Wagner SC, Castro SM. [Neonatal screening for hemoglobinopathies: a one-year experience in the public health system in Rio Grande do Sul State, Brazil]. *Cad Saude Publica.* 2006; **22**(8): 1709-14.

386. Spedini G, Capucci E, Rickards O, Fuciarelli M, Giaccaia L, Aebischer ML, et al. Some genetic erythrocyte polymorphisms in the Mbugu and other populations of the Central African Republic with an analysis of genetic distances. *Anthropologischer Anzeiger; Bericht uber die biologisch-anthropologische Literatur*. 1981; **39**(1): 10-9.
387. Spedini G, Fuciarelli M, Rickards O. Blood polymorphism frequencies in the Tofinu, the "Water Men" of Southern Benin. *Anthropologischer Anzeiger; Bericht uber die biologisch-anthropologische Literatur*. 1980; **38**(2): 121-30.
388. Spitz AJ. Health and morbidity survey, Seychelles, 1956-57. *Bull World Health Organ*. 1960; **22**: 439-67.
389. Spivak VA, Sou A, Lutsenko IN. [Distribution of abnormal hemoglobins S and C in the Republic of Guinea]. *Genetika*. 1992; **28**(8): 159-65.
390. Stirnadel HA, Stockle M, Felger I, Smith T, Tanner M, Beck HP. Malaria infection and morbidity in infants in relation to genetic polymorphisms in Tanzania. *Trop Med Int Health*. 1999; **4**(3): 187-93.
391. Storey J, Fleming AF, Cornille-Brogger R, Molineaux L, Matsushima T, Kagan I. Abnormal haemoglobins in the Sudan savanna of Nigeria. IV. Malaria, immunoglobulins and antimalarial antibodies in haemoglobin AC individuals. *Ann Trop Med Parasitol*. 1979; **73**(4): 311-5.
392. Suarez RM, Buso R, Meyer LM, Olavarrieta ST. Distribution of abnormal hemoglobins in Puerto Rico and survival studies of red blood cells using Cr51. *Blood*. 1959; **14**(3): 255-61.
393. Sukumaran PK, Sanghvi LD, Vyas GN. Sick cell trait in some tribes of western India. *Curr Sci*. 1956; **25**: 290-1.
394. Sunna EI, Gharaibeh NS, Knapp DD, Bashir NA. Prevalence of hemoglobin S and beta-thalassemia in northern Jordan. *J Obstet Gynaecol Res*. 1996; **22**(1): 17-20.
395. Suzuki A, Hamano S, Shirakawa T, Watanabe K, Endo T, Sharma S, et al. The distribution of hereditary erythrocytic disorders associated with malaria, in a lowland area of Nepal: a micro-epidemiological study. *Ann Trop Med Parasitol*. 2007; **101**(2): 113-22.
396. Swindler DR. The absence of the sickle cell gene in several Melanesian societies and its anthropologic significance. *Hum Biol*. 1955; **27**(4): 284-93.
397. Theodoridou S, Alemayehou M, Prappas N, Karakasidou O, Aletra V, Plata E, et al. Carrier screening and prenatal diagnosis of hemoglobinopathies. A study of indigenous and immigrant couples in northern Greece, over the last 5 years. *Hemoglobin*. 2008; **32**(5): 434-9.
398. Torres-Guerra E, Torres-Guerra T, Valbuena G, Arteaga Vizcaino M, Soto L. [Frequency of sickle-cell anemia in the population of "Cuatro Bocas," Parroquia Ricaurte, Mara municipality, Zulia state, Venezuela]. *Invest Clin*. 1993; **34**(2): 99-105.
399. Tosun F, Bilgin A, Kizilok A, Arpacı A, Yu?reg?ir GT. Five-year evaluation of premarital screening program for hemoglobinopathies in the province of Mersin, Turkey. *Turkish Journal of Haematology*. 2006; **23**(2): 84-9.
400. Trabuchet G, Dahmane M, Benabadji M. [Abnormal hemoglobins in Algeria]. *Sem Hop*. 1977; **53**(16): 879-81.
401. Trincao C. Hemoglobinas anormais nos territorios Portuguesas. *Boletim Clínico dos Hospitais Civis de Lisboa*. 1957; **21**: 813-27.
402. Trincao C, De Melo JM. Hemoglobin S rates in as heterozygotes. *Isr J Med Sci*. 1965; **1**(4): 772-6.
403. Trincao C, Pinto AR, de AC, Gouveia E. [Drepanocytthemia in the papel tribe of Portuguese Guinea]. *An Inst Med Trop (Lisb)*. 1950; **7**: 125-9.
404. Trowell HC, Raper AB, Welbourn HF. The natural history of homozygous sickle-cell anaemia in Central Africa. *The Quarterly journal of medicine*. 1957; **26**(104): 401-22.
405. Tshilolo L, Gulbis B, Barlow P, Damis E, Denis-Song R, Ferster A, et al. [Neonatal screening for hemoglobinopathies in the Brussels region]. *Rev Med Brux*. 1997; **18**(2): 70-3.
406. Tshilolo L, Kafando E, Sawadogo M, Cotton F, Vertongen F, Ferster A, et al. Neonatal screening and clinical care programmes for sickle cell disorders in sub-Saharan Africa: lessons from pilot studies. *Public Health*. 2008; **122**(9): 933-41.

407. Vafa M, Troye-Blomberg M, Anchang J, Garcia A, Migot-Nabias F. Multiplicity of *Plasmodium falciparum* infection in asymptomatic children in Senegal: relation to transmission, age and erythrocyte variants. *Malaria J.* 2008; **7**(1): 17.
408. van den Berghe LJ, Janssen P. Maladie a sickle cells en Afrique noire. *Ann Soc Belg Med Trop.* 1950; **30**: 1553-66.
409. Van der Dijs FPL, Van den Berg GA, Schermer JG, Muskiet FD, Landman H, Muskiet FAJ. Screening cord blood for hemoglobinopathies and thalassemia by HPLC. *Clin Chem.* 1992; **38**(9): 1864-9.
410. van Heyningen AM, Levenston MJ, Tamminga N, Scoop-Martijn EG, Wever RM, Verhagen AA, et al. Estimated incidence of sickle-cell disease in Aruba and St. Maarten suggests cost-effectiveness of a universal screening programme for St. Maarten. *The West Indian medical journal.* 2009; **58**(4): 301-4.
411. Vandepitte J, Dherte P. [Inquiry on abnormal hemoglobins in Stanleyville.]. *Ann Soc Belg Med Trop.* 1959; **39**: 711-5.
412. Vandepitte J, Motulsky AG. Abnormal haemoglobins in the Kasai province of the Belgian Congo. *Nature.* 1956; **177**(4512): 757.
413. Vella F. Abnormal haemoglobins, thalassaemia, and erythrocyte glucose-6-phosphate dehydrogenase deficiency in Singapore and Malaya. *Oceania.* 1962; **32**: 219-25.
414. Vella F. Haemoglobin S and sickling in Khartoum Province. *Trans R Soc Trop Med Hyg.* 1966; **60**: 48-52.
415. Vella F. Hemoglobin variants in Saskatchewan. *Clin Biochem.* 1967; **1**: 118-34.
416. Vella F. The human hemoglobin variants in Canada. *Clin Biochem.* 1975; **8**(5): 341-52.
417. Vyas GN, Bhatia HM, Sukumaran PK, Balkrishnan V, Sanghvi LD. Study of blood groups, abnormal hemoglobins and other genetical characters in some tribes of Gujarat. *Am J Phys Anthropol.* 1962; **20**: 255-65.
418. Walter H, Neumann S, Nemeskeri J. [Population genetic studies on the distribution of hemoglobin S and glucose-6-phosphate-dehydrogenase deficiency in Bodroghoz (Northeast Hungary)]. *Humangenetik.* 1965; **1**(7): 561-67.
419. Walters JH, Lehmann H. Distribution of the S and C haemoglobin variants in two Nigerian communities. *Trans R Soc Trop Med Hyg.* 1956; **50**(3): 204-8.
420. Wambua S, Mwacharo J, Uyoga S, Macharia A, Williams TN. Co-inheritance of alpha+-thalassaemia and sickle trait results in specific effects on haematological parameters. *Br J Haematol.* 2006; **133**(2): 206-9.
421. Weatherall DJ. Data for Sri Lanka. 2010.
422. Weatherall DJ, Gilles HM, Clegg JB, Blankson JA, Mustafa D, Boi-Doku FS, et al. Preliminary surveys for the prevalence of the thalassaemia genes in some African populations. *Ann Trop Med Parasitol.* 1971; **65**(2): 253-65.
423. Welch SG, Aidley DJ, Barry JV, Carter ND, Culliford BJ, Huntsman RG, et al. Blood group, serum protein and red cell enzyme polymorphisms in a population from the Seychelle Islands. *Hum Hered.* 1975; **25**(5): 346-53.
424. Wen-pin C, Li-hsia T. Two D-group abnormal hemoglobin found in Mongolian herdsmen. *Acta Genet Sin.* 1978; **5**(4): 263-9.
425. White JM, Byrne M, Richards R, Buchanan T, Katsoulis E, Weerasingh K. Red cell genetic abnormalities in Peninsular Arabs: sickle haemoglobin, G6PD deficiency, and alpha and beta thalassaemia. *J Med Genet.* 1986; **23**(3): 245-51.
426. Willcox MC. Thalassaemia in northern Liberia. A survey in the Mount Nimba area. *J Med Genet.* 1975; **12**(1): 55-63.
427. Willcox MC, Beckman L. Haemoglobin variants, beta-thalassaemia and G-6-PD types in Liberia. *Hum Hered.* 1981; **31**(6): 339-47.
428. Williams T. Data for Kenya. 2009.
429. Woodd RB, Smith HM, Clarke VA. The blood groups of the Timuri and related tribes in Afghanistan. *Am J Phys Anthropol.* 1967; **27**: 195-204.
430. Yang YM, Andrews S, Peterson R, Shah A, Cepeda M. Prenatal sickle cell screening education effect on the follow-up rates of infants with sickle cell trait. *Patient Educ Couns.* 2000; **39**(2-3): 185-9.

431. Yawson G, Marbell EC. Abnormal haemoglobins in 4000 blood donors at Korle Bu. Ghana Med J. 1973; **12**: 22-6.
432. Yorke D, Mitchell J, Clow C, Nuguid E, Cadogan R, Sinclair D, et al. Newborn screening for sickle cell and other hemoglobinopathies: a Canadian pilot study. Clin Invest Med. 1992; **15**(4): 376-83.
433. Yuregir GT, Arpacı A, Aksoy K, Tuli A, Dikmen N, Ozgunen FT, et al. Population at risk for hemoglobinopathies in Cukurova, Turkiye: Need for prenatal diagnosis. Annals of Medical Sciences. 1995; **4**(2): 61-9.
434. Yuregir GT, Kilinc M, Ekerbic?er H, Bilalog?lu N, Tekin N. Screening of hemoglobinopathies in Kahramanmaras?, Turkey. Turkish Journal of Haematology. 2001; **18**(2): 79-83.
435. Zago MA, Costa FF, Tone LG, Bottura C. Hereditary hemoglobin disorders in a Brazilian population. Hum Hered. 1983; **33**(2): 125-9.
